# Supplementary material for: Structural assembly of the bacterial essential interactome
Source: eLife. 2024 Jan 16;13:e94919. doi: 10.7554/eLife.94919 (PMC10863985; doi:10.7554/eLife.94919)
Supplement: Source data 1. [file elife-94919-data1.xlsx]

## Sheet: Summary_statistics
Supplementary Data, File 1. Summary statistics for the essential proteins used in the study, excluding ribosomal proteins, tRNA ligases and proteins unique to a particular specie.
Specie	# essential genes	Gene essentiality characterization	References
Escherichia coli	187	Single-gene knockout mutants, transposoon mutagenesis, Transposon-directed insertion site sequencing	(Baba et al., 2006; Gerdes et al., 2003; Goodall et al., 2018)
Pseudomonas aeruginosa	169	Tn-seq	(Liberati et al., 2006; Gallagher et al., 2011; Poulsen et al., 2019)
Klebsiella pneumoniae	154	Sequence-defined transposon mutagenesis	(Ramage et al., 2017)
Acinetobacter baumannii	107	High-density transposon mutagenesis and CRISPRi	(Bai et al., 2021)
Bacillus subtilis	105	CRISPRi, gene deletion libraries, Inseq	(Commichau et al., 2013)
Clostridium difficile	94	Tn-seq	(Dembek et al., 2015)
Staphylococcus aureus	140	Conditional phenotypes generated by antisense RNA, Transposon-mediated differential hybridisation, Phage-based transposon mutagenesis	(Ji et al., 2001; Chaudhuri et al., 2009; Santiago et al., 2015)
Streptococcus pneumoniae	130	CRISPRi	(Liu et al., 2017)

## Sheet: Gram-negative_annotations
Supplementary Data, File 1. Gram-negative essential proteins used in this study in E. coli, P. aeruginosa, K. pneumoniae and A. baumannii. The gene names and the uniprot_ID are provided.
Gene_name_coli	Uniprot_coli	Gene_name_pseudomonas	Uniprot_pseudomonas	Gene_name_klebsiella	Uniprot_klebsiella	Gene_name_baumannii	Uniprot_baumannii
acca	P0ABD5	acca	Q02RB1	acca	A6T4Y7	acca	A0A059ZJY6
accb	P0ABD8	accb	A0A0H2ZIA1	accb	A6TES2	accc	A0A432ANZ3
accc	P24182	accd	Q02PS5	accc	A6TES3	accd	A0A858S2X4
accd	P0A9Q5	adk	Q02RF8	accd	A6TC02	acpp	A0A059ZU64
acpp	P0A6A8	arob	Q02EX9	acpp	A6T7F4	arob	A0A0J8V157
acps	P24224	aroc	Q02KH1	acps	A6TCH7	aroc	A0A081GZ37
adk	P69441	asd	A0A0H2ZDK9	adk	A6T5N7	atpa	A0A1S2FUI0
asd	P0A9Q9	atpa	Q02DF2	asd	A6TF52	atpb	A0A6H3SV39
atpc	P0A6E6	atpb	Q02DE8	bama	A6T4X9	atpc	A0A2G8WS56
atpf	P0ABA0	atpd	Q02DF4	bamd	A6TCK3	atpd	A0A3R9S7R2
bama	P0A940	atpe	Q02DE9	bira	A6TGN0	atpe	A0A429MU96
bamd	P0AC02	atpf	Q02DF0	cdsa	A6T4X7	atpf	A0A335DF76
bira	P06709	atpg	Q02DF3	coaa	A6TGN1	atpg	A0A245ZZJ7
cdsa	P0ABG1	atph	Q02DF1	coabc	A6TFN0	atph	A0A6F8TL56
cmk	P0A6I0	bira	A0A0H2ZGL0	coad	A6TFM5	cdsa	A0A059ZMK7
coaa	P0A6I3	cmk	Q02PW9	coae	A6T4P5	cmk	A0A0D5YJJ4
coad	P0A6I6	coabc	A0A0H2ZJE6	dapa	A6TCA1	dapa	A0A0B9XHI3
coae	P0A6I9	coad	Q02U51	dapb	A6T4H8	dapb	A0A059ZJ34
dapa	P0A6L2	coae	A0A0H2ZFX2	dapd	A6T4W8	dapd	Q5DL43
dapb	P04036	dapb	Q02FR3	dape	A6TC94	dapf	A0A0D8GNZ8
dapd	P0A9D8	dapd	A0A0H2ZEK0	dapf	A6TGJ2	dnaa	A0A059ZTB3
dape	P0AED7	dape	Q02IY2	dnaa	A6TG04	dnab	A0A2G1TQH7
dapf	P0A6K1	dapf	Q02E84	dnab	A6TGW0	dnag	A0A059ZJT7
dnaa	P03004	dnaa	Q02V80	dnac	A6THX3	dnax	A0A0D5YGJ9
dnab	P0ACB0	dnag	A0A0H2ZLR9	dnae	A6T4Y6	eno	A0A333VG30
dnac	P0AEF0	dnak	Q02FR1	dnag	A6TE48	fabb	V5VFT6
dnae	P10443	dnan	A0A0H2ZIW1	dnan	A6TG03	fabd	A0A077GD21
dnag	P0ABS5	dnaq	A0A0H2ZA09	dnax	A6T5N3	fabg	A0A081H0G0
dnak	P0A6Y8	dnax	A0A0H2Z990	dxr	A6T4X5	fabz	A0A380UNQ5
dnan	P0A988	dut	Q02E41	dxs	A6T5F3	fbp	A0A077GML8
dnaq	P03007	dxr	Q02RC2	eno	A6TD53	fdx	A0A0M3FHI6
dnax	P06710	dxs	Q02SL1	era	A6TCI0	fola	A0A098SJI9
dut	P06968	era	Q02HS3	faba	A6T748	fold	A0A081H219
dxr	P45568	erpa	Q02TA1	fabb	A6TC09	fpr	V5VBK8
dxs	P77488	faba	Q02K95	fabd	A6T7F2	ftsa	A0A3S1BNK9
eno	P0A6P9	fabb	Q02K94	fabg	A6T7F3	ftsb	A0A1E3MAZ9
erpa	P0ACC3	fabd	A0A0H2ZBT9	fabi	A6T7Z6	ftsi	A0A0D5YDP0
faba	P0A6Q3	fabg	A0A0H2ZD54	fabz	A6T4Y2	ftsl	A0A5P1AW01
fabb	P0A953	fabz	Q02RB7	folb	A0A5C2LMY5	ftsq	A0A059ZIX6
fabd	P0AAI9	fbp	Q02EQ6	folc	A6TC01	ftsy	A0A0D5YHX9
fabg	P0AEK2	fola	A0A0H2ZJZ7	fold	A6T5R4	ftsz	A0A0Q1QKQ6
fabi	P0AEK4	folb	A0A0H2ZKJ2	fole	A6TBN8	glmm	A0A059ZEY9
fabz	P0A6Q6	folc	A0A0H2ZDG0	folk	A6T4T1	glmu	A0A077GS64
fdx	P0A9R4	fold	Q02KT7	ftsa	A6T4N7	gmk	A0A059ZQZ9
fola	P0ABQ4	fpr	A0A0H2ZE93	ftsb	A6TD40	guab	A0A059ZJE9
folb	P0AC16	ftsa	A0A0H2ZGN1	ftse	A6TF82	gyrb	Q43907
folc	P08192	ftsk	A0A0H2ZC79	ftsh	A6TEJ7	hola	A0A2P1AS29
fold	P24186	ftsl	A0A0H2ZFM0	ftsi	A6T4M7	hsca	A0A077GVZ7
fole	P0A6T5	ftsq	A0A0H2ZGP2	ftsl	A6T4M6	ispb	A0A335UPS8
folk	P26281	ftsw	A0A0H2ZGG8	ftsq	A6T4N6	ispd	A0A090BA60
ftsa	P0ABH0	ftsy	A0A0H2ZKT5	ftsw	A6T4N2	ispe	A0A1C9CRD2
ftsb	P0A6S5	ftsz	A0A0H2ZM25	ftsy	A6TF83	ispg	A0A6H3TG74
ftse	P0A9R7	glmm	Q02FS3	ftsz	A6T4N8	kdsa	A0A335MXL7
ftsh	P0AAI3	glms	A0A0H2ZDW3	glmm	A6TEJ5	kdsb	A0A059ZLN7
ftsi	P0AD68	glmu	Q02DF6	glms	A6TG33	lepb	A0A0J8W1C1
ftsk	P46889	gmha	Q02H15	glmu	A6TG34	lolb	A0A081H968
ftsl	P0AEN4	gmk	A0A0H2ZJE1	gmk	A6TFP7	lold	A0A0M4BQB2
ftsq	P06136	grpe	Q02FR0	grpe	A6TCM1	lpta	A0A2I8CPR7
ftsw	P0ABG4	guab	A0A0H2ZEW8	gyra	A6TBT6	lptb	A0A429MLB0
ftsy	P10121	gyra	A0A0H2ZCA6	gyrb	A6TG01	lptc	A0A2I8CPT2
ftsz	P0A9A6	gyrb	A0A0H2ZJS1	hemb	A6T597	lptf	A0A241ZAG1
glmm	P31120	hemb	A0A0H2ZIV9	hemc	A6TGI8	lpxa	A0A1E3MBH3
glms	P17169	hemc	Q02EA3	hemd	A6TGI7	lpxb	A0A059ZK65
glmu	P0ACC7	hemd	A0A0H2ZIY8	heme	A6TGQ4	lpxc	A0A059ZJD9
gmha	P63224	heme	Q02EY3	hemg	A6TGM8	lpxd	A0A0E1FPL0
gmk	P60546	hemh	Q02G19	hemh	A0A3F3BIK6	lpxh	A0A090B9C3
grpe	P09372	heml	Q02SE5	heml	A6T4V8	lysc	A0A6F8THX2
gyra	P0AES4	hola	A0A0H2ZEJ7	hola	A6T6A1	metk	A0A241ZDG4
gyrb	P0AES6	holb	A0A0H2ZD49	holb	A6T7F9	mray	A0A1S2G639
hemb	P0ACB2	hsca	Q02RW4	infa	A6T6Y1	msba	A0A098SJ45
hemc	P06983	hscb	Q02RW5	ispb	A6TEK6	mura	A0A0R0VXX6
hemd	P09126	infa	Q02NB1	ispd	A6TD39	murc	A0A219CIG5
heme	P29680	ispb	A0A0H2ZGA4	ispe	A6TAP2	murd	A0A0B9W6J3
hemg	P0ACB4	ispd	Q02RA5	ispf	A6TD38	mure	A0A059ZKH5
hemh	P23871	ispe	Q02G05	ispg	A6TCD4	murf	A0A0D5YEC3
heml	P23893	ispf	Q02R99	isph	A6T4G3	murg	A0A0G4QVA1
hola	P28630	ispg	Q02RV7	kdsa	A6TAN5	nade	A0A0Q1HU19
holb	P28631	isph	Q02GC0	kdsb	A6T710	nusa	A0A059ZHA0
hsca	P0A6Z1	kdsa	Q02RA8	lepb	A6TCI2	nusb	A0A241ZH32
hscb	P0A6L9	kdsb	Q02PE2	lexa	A6TGV2	nusg	A0A059ZCX7
ispb	P0AD57	lgt	Q02U74	lgt	A6TDG4	parc	A0A075TJT0
ispd	Q46893	liga	Q02K12	liga	A6TC47	pare	A0A0J8TU69
ispe	P62615	lipa	Q02SG3	lnt	A6T6B1	pdxa	A0A0D5YD85
ispf	P62617	lnt	Q02SF2	lola	A6T6Y8	pdxj	A0A0D5YEU4
ispg	P62620	lola	Q02NA6	lolb	A6TAP1	pgk	A0A059ZHN5
isph	P62623	lolb	Q02G06	lolc	A6T7H7	pyrd	A0A059ZKK0
kdsa	P0A715	lolc	A0A0H2ZCX8	lold	A6T7H6	pyrf	A0A059ZRY3
kdsb	P04951	lold	A0A0H2ZD68	lole	A6T7H7	pyrh	A0A380UP49
lepb	P00803	lpta	A0A0H2ZGK2	lpta	A6TEL9	rho	A0A335T3C0
lexa	P0A7C2	lptc	A0A0H2ZFQ0	lptc	A6TEL8	ribf	A0A059ZGB5
lgt	P60955	lptd	Q02TG8	lptd	A6T4J0	rpia	A0A2I8CRS4
liga	P15042	lpte	A0A0H2ZFQ7	lpte	A6T6A2	rpoa	A0A7X1SF27
lipa	P60716	lptf	A0A0H2ZF09	lpxa	A6T4Y3	rpob	A0A060GUH1
lnt	P23930	lgtg	A0A0H2ZE46	lpxb	A6T4Y4	rpoc	A0A059ZHD8
lola	P61316	lpxa	Q02RB6	lpxc	A6T4N9	rpoh	A0A2P1APN5
lolb	P61320	lpxb	Q02RB5	lpxd	A6T4Y1	rsmh	A0A0D5YCQ2
lolc	P0ADC3	lpxc	Q02H34	lpxh	A6T5R0	seca	A0A059ZR97
lold	P75957	lpxd	Q02RB8	lpxk	A6T707	secd	A0A0J8TSV6
lole	P75958	lpxh	Q02KT3	lspa	A6T4G1	sece	A0A059ZGU8
lpta	P0ADV1	lpxk	Q02PE4	metk	A6TDV1	secy	A0A090B767
lptb	P0A9V1	lysc	A0A0H2Z678	mray	A6T4N0	suca	A0A8B4MT60
lptc	P0ADV9	metk	Q02TL9	msba	A6T706	sucb	A0A0D5YFF8
lptd	P31554	mray	Q02H25	mukb	A6T716	thil	A0A077GVQ1
lpte	P0ADC1	mrda	A0A0H2ZEK5	mukf	A6T714	tpia	A0A059ZM17
lptf	P0AF98	mrdb	A0A0H2ZFR6	mura	A6TEK8	ubia	A0A077GFJ9
lptg	P0ADC6	mreb	A0A0H2ZGL8	murb	A6TGM9	yajc	V5V9Y6
lpxa	P0A722	mrec	A0A0H2ZFS3	murc	A6T4N4	zipa	A0A0D5YKH6
lpxb	P10441	mred	A0A0H2ZGU8	murd	A6T4N1
lpxc	P0A725	msba	A0A0H2ZHD7	mure	A6T4M8
lpxd	P21645	mura	Q02GZ1	murf	A6T4M9
lpxh	P43341	murb	A0A0H2ZD69	murg	A6T4N3
lpxk	P27300	murc	Q02H29	murj	A6T7E2
lspa	P00804	murd	A0A0H2ZGX6	nadd	A6T6A0
metk	P0A817	mure	A0A0H2ZGP8	nade	A6T7U0
mray	P0A6W3	murf	A0A0H2ZGN5	nadk	A6TCM2
mrda	P0AD65	murg	Q02H28	nrda	A6TBT8
mrdb	P0ABG7	muri	Q02G12	nrdb	A6TBT9
mreb	P0A9X4	nade	Q02F98	parc	A6TE12
mrec	P16926	nadk	Q02PQ1	pare	A6TE19
mred	P0ABH4	ndk	Q02RW1	pgk	A6TDT1
msba	P60752	nrda	A0A0H2Z855	pgsa	A6TB62
mukb	P22523	nrdb	A0A0H2Z7Z1	plsb	A6TGV0
mukf	P60293	nusa	A0A0H2ZI23	plsc	A6TE11
mura	P0A749	nusb	A0A0H2ZFV5	ppa	A6T9L2
murb	P08373	nusg	A0A0H2ZF93	prfa	A6TAN9
murc	P17952	parc	A0A0H2ZL55	pria	A6TGC5
murd	P14900	pare	A0A0H2ZIJ2	psd	A6TH77
mure	P22188	pdxa	A0A0H2ZLL0	pssa	A6TCJ7
murf	P11880	pdxj	Q02HS5	pyrg	A6TD54
murg	P17443	pgsa	A0A0H2ZBV5	pyrh	A6T4X3
muri	P22634	pnp	Q02FT2	riba	A6T7Y5
murj	P0AF16	ppa	A0A0H2ZFK1	ribb	A6TE29
nadd	P0A752	prfa	Q02G09	ribc	A6TA10
nade	P18843	pria	A0A0H2ZIE1	ribf	A6T4F9
nadk	P0A7B3	psd	Q02F61	rimm	A6TCL6
ndk	P0A763	pssa	A0A0H2ZHS5	rpoc	A6TGP1
nrda	P00452	pyrd	Q02PL5	seca	A6T4P1
nrdb	P69924	pyrg	Q02RA9	secb	A6TFK4
parc	P0AFI2	pyrh	Q02RC6	secd	A6T5E0
pare	P20083	rep	A0A0H2ZJC9	sece	A6TGN3
pdxj	P0A794	rho	A0A0H2ZHW8	secf	A6T5E1
pgk	P0A799	riba	Q02SL4	secy	A6TEV2
pgsa	P0ABF8	ribf	A0A0H2ZHL4	thil	A6T5F0
plsb	P0A7A7	rimm	Q02RL7	tmk	A6T7F8
plsc	P26647	rnha	Q02KV8	topa	A6T7Y2
pnp	P05055	rpe	A0A0H2ZKY8	tsf	A6T4X2
ppa	P0A7A9	rpia	Q02U86	ubia	A6TGU9
pria	P17888	rpoc	Q02T86	ubib	A6TGL5
psd	P0A8K1	rpoh	A0A0H2ZK26	ubid	A6TGM1
pssa	P23830	seca	Q02H37	ubie	A6TGL3
pyrf	P08244	secd	A0A0H2ZF84	waaa	A6TFM3
pyrg	P0A7E5	secf	A0A0H2ZFD4	yajc	A6T5D9
pyrh	P0A7E9	secy	A0A0H2ZGC8	yidc	A6TG08
rep	P03856	suca	A0A0H2Z9D0	zipa	A6TC48
riba	P0A7I7	sucb	A0A0H2Z8W8
ribb	P0A7J0	thil	A0A0H2ZFU2
ribc	P0AFU8	thya	Q02U73
ribf	P0AG40	tmk	Q02PC5
rnha	P0A7Y4	tonb	A0A0H2ZJP3
rpe	P0AG07	tpia	Q02FS4
rpoa	P0A7Z4	tsf	Q02RC7
rpob	P0A8V2	ubia	Q02E04
rpoc	P0A8T7	ubib	Q02EV2
rpoh	P0AGB3	ubie	Q02EV4
rsmh	P60390	ubig	Q02PX7
secb	P0AG86	ubih	A0A0H2ZIS9
secd	P0AG90	waaa	A0A0H2ZIK5
sece	P0AG96	yidc	Q02DE0
secf	P0AG93	zipa	Q02K11
secy	P0AGA2
suca	P0AFG3
sucb	P0AFG6
thil	P0AGG0
thya	P0A884
tmk	P0A720
tonb	P02929
topa	P06612
tsf	P0A6P1
ubia	P0AGK1
ubib	P0A6A0
ubid	P0AAB4
ubie	P0A887
ubig	P17993
ubih	P25534
waaa	P0AC75
yidc	P25714
zipa	P77173

## Sheet: Gram-positive_annotations
Supplementary Data, File 1. Gram-positive essential proteins used in this study in S. aureus, B.subtilis, S. pneumoniae and C. difficile. The gene names and the uniprot_ID are provided.
Gene_name_aureus	Uniprot_aureus	Gene_name_subtilis	Uniprot_subtilis	Gene_name_streptococcus	Gene_name_streptococcus	Gene_name_clostridium	Uniprot_clostridium
acca	A0A0D3Q8K8	acca	O34847	acca	A0A064BZA7	acca	A0A069AQW2
accb	A0A090LU16	accb	P49786	accb	A0A0B7L8W2	accb	A0A069AT81
accc	A0A0U1MM39	accc	O34544	accd	A0A064C516	accc	A0A031WEA4
accd	A0A380E528	accd	C0SP93	acka	A0A062WRF6	accd	A0A031WDT9
acka	A0A0U1MMU7	acps	P96618	acpp	A0A062WR66	acps	A0A069AUW9
acpp	A0A0D1JMR1	adk	P16304	acps	A0A0B7KVQ1	adk	A0A068EZP8
acps	A0A0D1IAN7	asd	P94552	adk	A0A062WNZ5	asd	A0A031WJ53
adk	A0A133PYB9	bira	P0CI75	atpd	A0A064BXA9	atpg	A0A031WJD9
atpd	A0A0D1IRI8	cdsa	O31752	atpe	A0A4M3JKT9	cdsa	A0A031WJ94
atpe	A0A0D1GSZ4	cmk	P38493	atpf	A0A064C340	clpx	A0A031WCN0
atpf	A0A0D1J368	coabc	O35033	atpg	A0A064BYZ5	coabc	A0A069A9K9
bira	A0A0E7NXW5	coad	O34797	cdsa	A0A064C083	coad	A0A031WCG6
cdsa	A0A811I4M0	coae	O34932	clpx	A0A064C077	coae	A0A031WG49
clpx	A0A0D1IFN3	dapf	O32114	cmk	A0A064C099	dapf	A0A031WCK0
cmk	A0A0U1MLA9	dapg	Q04795	coad	A0A062WU92	dapg	A0A031WHA0
coad	A0A0D1K1G7	daph	O34981	coae	A0A064C4Y1	daph	A0A031WKF5
coae	A0A0U1MMV9	ddl	P96612	daca	A0A064BWG7	ddl	A0A060PLB0
daca	A0A0Z4LY14	divib	P16655	divib	A0A098ZCW2	dnac	A0A031WG82
ddl	A0A0S3E1Z1	dnaa	P05648	dnaa	A0A064BYH4	dnad	A0A031WI07
divib	A0A0U1MKE3	dnab	P07908	dnab	A0A062WMW9	dnae	A0A069AG07
dnaa	P68867	dnac	P37469	dnae	A0A0T7SVU6	dnai	A0A381I6I3
dnab	A0A113RDX4	dnad	P39787	dnag	A0A064BYR7	dnak	A0A031WHV7
dnac	A0A113RDX4	dnae	O34623	dnai	A0A064C6C2	dnax	A0A031WGN5
dnae	A0A0E7W397	dnag	P05096	dnak	A0A062WLP4	efp	A0A031WD52
dnag	O05338	dnai	P06567	dnan	A0A0B7KSQ6	eno	A0A069AEA0
dnai	A0A0U1MMS5	dnan	P05649	dnax	A0A064BWZ4	fabd	A0A069AX93
dnak	P45554	dnax	P09122	efp	A0A064C520	fabf	A0A031WGM3
dnan	P0A024	eno	P37869	eno	A0A064C0W5	fabh	A0A031WGL7
dnax	A0A0D6G9X7	fabd	P71019	ezra	A0A098Z358	fabk	A0A031WIF2
efp	A0A380EKQ6	fabf	O34340	fabd	A0A098ZIZ5	fabz	A0A031WCJ2
eno	O69174	fabg	P51831	fabf	A0A0B7M2M4	fba	A0A031WAY2
ezra	A0A0U1MND5	fabz	P94584	fabg	A0A064C3C5	ffh	A0A031WDB6
fabd	Q93QD4	ffh	P37105	fabh	A0A064BZ99	folb	A0A069AEL9
fabf	Q5TKS0	folb	P28823	fabk	A0A064C254	folc	A0A069AX18
fabg	A0A0D1H721	folc	Q05865	fabz	A0A098Z5C5	fole	A0A031WEP4
fabh	A0A0D1H8Z3	folk	P29252	fba	A0A062WRW9	folk	A0A069AVC5
fabz	A0A898CN24	folp	A0A6M3Z6J5	ffh	A0A062WVI8	folp	A0A069AC30
ffh	A0A090LVU9	ftsa	P28264	fni	A0A064C0I4	ftsy	A0A069AD67
fni	P58052	ftsl	Q07867	fole	A0A062WL35	ftsz	A0A069AT72
folp	O05701	ftsy	P51835	ftsa	A0A0B7MDU8	fusa	A0A031WAZ7
ftsa	A0A0U1MIS1	ftsz	P17865	ftsh	A0A064BWR2	gapa	A0A031WJM9
ftsh	A0A0E7WS66	gapa	P09124	ftsl	A0A0T8C727	glmm	A0A069A0M2
ftsl	A0A1D5A7E9	glmm	O34824	ftsy	A0A064C017	glms	A0A031WEL3
ftsy	A0A090LPV1	glms	P0CI73	ftsz	A0A098ZPN0	glmu	A0A069AMW2
ftsz	P0A031	gmk	O34328	fusa	A0A062WQ96	gmk	A0A031WAH1
fusa	P68790	gyra	P05653	glmm	A0A062WN73	gpmi	A0A069AST4
glmm	A0A0D6H967	gyrb	P05652	glms	A0A064BYE5	gpsa	A0A031WB15
glms	A0A0D1HZM1	infb	P17889	glmu	A0A064C233	grea	A0A031WEF1
glmu	A0A0U1MG39	ispd	Q06755	gmk	A0A0B7M1Y0	grol	Q9KKF0
gmk	A0A090LPQ2	ispe	P37550	gpsa	A0A064BY83	grpe	A0A031WHE4
gpmi	A0A0U1MG71	ispf	Q06756	gpsb	A0A064C2W2	guaa	A0A031WEK2
gpsa	A0A0D6GYQ6	ispg	P54482	grea	A0A064C345	guab	A0A031WJB8
gpsb	A0A0D1GR49	isph	P54473	grol	A0A064BWR1	infb	A0A031WCZ0
grea	A0A380DTN8	liga	O31498	guaa	A0A064C0Q1	infc	A0A031WFZ3
grol	Q08854	mena	P39582	guab	A0A062WMW0	ispd	A0A031WDD9
grpe	P63191	menb	P23966	gyra	A0A064C152	ispe	A0A031WFF4
guaa	A0A0D6GB61	metk	P54419	gyrb	A0A064BXI7	ispf	A0A031WD39
guab	A0A2X2LVM5	mray	Q03521	hprk	A0A064C117	ispg	A0A069A8Y2
gyra	P20831	mrec	Q01466	infb	A0A064C0Z1	isph	A0A031WEY8
gyrb	P0A0K8	murb	P18579	infc	A0A098ZGX6	liga	A0A031WCM6
hprk	A0A0D1IQ37	murc	P40778	ispd	A0A0I7S6U2	metk	A0A031WEM0
infb	A0A0D3Q6N7	murd	Q03522	map	A0A064C1Y1	mray	A0A031WBM4
infc	A0A0D1J2E1	mure	Q03523	metk	A0A064C0N3	mrec	A0A031WIA8
liga	Q9AIU7	murf	P96613	mray	A0A098Z983	murb	A0A069AKN4
map	Q53599	murg	P37585	mrec	A0A064C1J4	murc	A0A069AXD2
mena	A0A0U1MHP2	nadd	P54455	murc	A0A098ZKG9	murd	A0A031WCS1
menb	A0A0D1H2U8	nade	P08164	murd	A0A098ZCL1	mure	A0A069AJK9
metk	P50307	nrde	P50620	mure	A0A064C357	murf	A0A069ACP8
mray	P0C1R8	nrdf	P50621	murf	A0A0B4ZKP2	murg	A0A031WAP5
murb	P61431	nrdi	P50618	murg	A0A098ZNS4	muri	A0A031WF02
murc	O31211	nusa	P32727	muri	A0A062WWL4	nadd	A0A031WHB9
murd	P0A091	parc	Q45066	mvad	A0A098Z9B2	nade	A0A031WDW9
mure	A0A0E7MX78	pare	Q59192	nade	A0A064BZH5	pfka	A0A031WC37
murf	A0A0E8J639	pcra	O34580	nrde	A0A0B7LYQ0	pgi	A0A069AF18
murg	A0A0D6HLK7	pgsa	P46322	nrdf	A0A062WM39	pgk	A0A031WJX1
muri	A0A0U1MK70	plsx	P71018	nusa	A0A098Z252	pgsa	A0A069A5I8
mvad	A0A0U1MG73	plsy	Q45064	nusb	A0A098ZJ03	plsx	A0A031WGB1
nadd	A0A0D6HJE2	polc	P13267	nusg	A0A062WNF2	plsy	A0A031WAM0
nade	A0A0D1K0R6	ppac	P37487	parc	A0A0D6J961	polc	A0A031WJG5
nrde	A0A0U1MGD0	prfa	P39792	pare	A0A064BYZ7	ppac	A0A069A222
nrdf	A0A6J9VCD0	prfb	P28367	pcra	A0A064BXT9	prfa	A0A031WJF2
nrdi	P0C1S2	pria	P94461	pfka	A0A064C3A6	prfb	A0A031WCU9
nusa	A0A0U1MJR3	pyrg	P13242	pgi	A0A064C3W1	pria	A0A069AJ54
nusb	A0A0U1MLV3	pyrh	O31749	pgk	A0A098ZCA1	pyrh	A0A031WKE8
nusg	A0A6B2IXS5	recu	P39792	plsx	A0A064C1D4	rny	A0A069A5J1
parc	P0C1U9	rpoa	P20429	plsy	A0A062WV64	rpob	A0A031WAF8
pare	P0C1S7	rpob	P37870	pola	A0A0B4ZG19	rpoc	A0A031WA07
pcra	A0A0D1JME1	rpoc	P37871	polc	A0A098ZQC5	rpoz	A0A031WAW9
pfka	A0A0Z4V5F8	seca	P28366	ppac	A0A064C372	secy	A0A031WA37
pgi	A0A0Y8YTG1	sece	Q06799	prfa	A0A064C4T9	sepf	A0A031WAU9
pgk	P68820	secy	P16336	prfb	A0A064C1B1	smpb	A0A031WAJ4
pgsa	A0A0D1HHM1	smc	P51834	pria	A0A064C694	tmk	A0A069AHI9
plsx	A0A0D1JWV8	sufb	O32162	ptsi	A0A0B7LFZ1	tsf	A0A031WJ99
plsy	A0A0D6HMV0	sufc	P80866	pyk	A0A064C0M3	upps	A0A031WEH3
pola	A0A0U1MPI0	sufd	O32165	pyrc	A0A064C3Q2
polc	P0C1P9	sufs	O32164	pyrf	A0A064BYX1
ppac	A0A7R6PCZ3	tagg	P42953	pyrh	A0A0B7LE88
prfa	Q8GN53	tagh	P42954	reca	A0A062WS62
prfb	A0A0U1MHM5	tmk	P37537	recf	A0A064C1I4
pria	A0A0D6HR61	trxa	P14949	recu	A0A064BUZ3
ptsi	P51183	trxb	P80880	rny	A0A064C1Z7
pyk	A0A0U1MPJ9	tsf	P80700	rpoa	A0A062WQC1
pyrc	A0A0B6XPB5	upps	O31751	rpob	A0A0B7L1K2
pyrf	A0A0C5HR57	walk	Q45614	rpoc	A0A0B7L6C1
pyrg	A0A0U1MRK8	walr	P37478	rpod	A0A098Z3G9
pyrh	A0A0D1IVL3			rpoz	A0A0B4ZNL8
reca	P68845			ruva	A0A064C5K2
recf	P68863			ruvb	A0A064C2G2
recu	Q8GN53			seca	A0A064C3L7
rny	A0A0Y9Q1L5			sece	A0A062WLP2
rpoa	A0A0D1GTM7			secy	A0A062WQC4
rpob	A0A0N7FMU2			smc	A0A064C284
rpoc	P0C1T4			ssb	A0A098Z6J6
rpod	A0A0D1G603			sufb	A0A0B4ZPE4
ruva	A0A2I7Y4V0			sufc	A0A064C136
ruvb	A0A0D1I8Z6			sufd	A0A064C146
sece	A0A0D1I1U7			sufs	A0A0B7L420
secy	A0A0U1MRG0			tarj	A0A062WP44
sepf	Q9ZHA2			thya	A0A062WLI5
smc	A0A0D1HPG3			tkt	A0A0B7KS33
smpb	A0A2C9TS59			tmk	A0A062WLV3
ssb	A0A090M1W2			topa	A0A064C052
tagg	A0A090LR59			tpia	A0A062WQE6
tagh	Q9LC44			tsf	A0A062WLF2
tarj	A0A0D1EYX3			tuf	A0A062WSP2
thya	P0A0M5			upps	A0A062WRF8
tkt	A0A0D6HN74			uvra	A0A098ZCF0
tmk	A0A0D1IIC9			uvrb	A0A064C029
topa	Q06AK7			uvrc	A0A064C2N6
tpia	P68823			zwf	A0A064C288
trxa	P0A0K6
trxb	A0A2S6DRY9
tsf	A0A2X2JWB8
tuf	A0A089VA15
uvra	A0A0B4NAE1
uvrb	A0A0U1MG22
uvrc	Q9ZEH3
walk	Q9RDT3
walr	Q9RDT5
zwf	A0A0D1FJV3

## Sheet: Selected_Gram-negative_PPIs
Supplementary Data, File 1. List of selected Gram-negative essential PPIs modeled by AF2. Protein1 and Protein2 are the two proteins involved in the binary interaction. For each protein pair, the ipTM, pDockQ and pDockQ2 scores corresponding to the best model is provided.
Protein1	Protein2	ipTM	pDockQ	min pDockQ2			Function
acca	accb	0.804135	0.215	0.0134335			FA synthesis
acca	accc	0.437531	0.019	0.00734779			DNA replication
acca	accd	0.916124	0.718	0.696065			OMP transport
acca	dnae	0.337008	0	0.00734779			Cell division and elongation
acca	eno	0.264313	0.155	0.0094782			LPS synthesis
acca	fabb	0.352926	0.032	0.00954335			LPS transport
acca	fabd	0.288198	0.03	0.00834082			Lipoprotein transport
acca	fabz	0.272263	0.036	0.0172039			Other
accb	accc	0.585749	0.354	0.121292
accb	accd	0.265018	0.091	0.0102981
accb	bira	0.841458	0.585	0.740109
accb	fabd	0.586234	0.354	0.0279691
accb	fabz	0.227428	0.111	0.0101611
accc	accd	0.561655	0.2	0.0169408
accc	bira	0.321551	0.279	0.00958871
accc	eno	0.283395	0.171	0.00967853
accc	fabd	0.246423	0.274	0.0100576
accc	hola	0.228425	0.094	0.0103566
accd	acpp	0.350833	0.1	0.0110295
accd	eno	0.261124	0.244	0.00975088
accd	fabd	0.260962	0.028	0.0106806
accd	fabg	0.226545	0.022	0.00958659
accd	fabz	0.416039	0.215	0.00922957
accd	folc	0.275083	0.488	0.0093346
acpp	acps	0.857357	0.325	0.681642
acpp	atpc	0.222078	0.123	0.0111761
acpp	faba	0.850226	0.135	0.653497
acpp	fabb	0.837767	0.071	0.577635
acpp	fabd	0.693932	0.191	0.155701
acpp	fabg	0.757271	0.051	0.432923
acpp	fabi	0.75308	0.093	0.255308
acpp	fabz	0.761144	0.155	0.327205
acpp	lpxa	0.450324	0.054	0.0586601
acpp	lpxd	0.725764	0.081	0.241598
acpp	mukb	0.760101	0.078	0.316863
acpp	ribf	0.903623	0.315	0.754977
acpp	seca	0.407195	0.045	0.00932134
acps	coae	0.261116	0.265	0.00966038
adk	dut	0.239075	0.223	0.00916483
adk	gyrb	0.292314	0.052	0.00854544
adk	ndk	0.25269	0.273	0.0105199
adk	nrda	0.337582	0.059	0.0087029
adk	nrdb	0.441177	0.086	0.015347
adk	pnp	0.29125	0.052	0.00902941
adk	ppa	0.275475	0.196	0.0102851
adk	secy	0.292998	0.081	0.00945827
adk	thil	0.247434	0.228	0.00853166
arob	aroc	0.264708	0	0.00734779
aroc	ubia	0.277351	0.058	0.00981327
asd	dapa	0.231424	0.049	0.00961489
asd	dapb	0.196192	0.019	0.00734779
asd	dapd	0.209584	0.704	0.00984935
asd	rpoc	0.326628	0.251	0.00986432
atpa	atpb	0.264678	0.033	0.00857324
atpa	atpd	0.863324	0.657	0.403525
atpa	atpe	0.322771	0.022	0.00986474
atpa	atpf	0.231995	0	0.00734779
atpa	atpg	0.719732	0.212	0.0960008
atpa	atph	0.488326	0.108	0.0147348
atpa	fbp	0.288571	0.071	0.00938455
atpa	hsca	0.240998	0.209	0.00895724
atpa	msba	-	-	-
atpa	pyrd	0.307621	0.118	0.00959788
atpa	secy	0.233556	0.067	0.0089502
atpa	suca	0.297652	0.087	0.00946899
atpb	atpd	0.351585	0.067	0.00921918
atpb	atpe	0.611659	0.137	0.0374443
atpb	atpf	0.551769	0.25	0.0672282
atpb	atpg	0.404869	0.049	0.0272715
atpb	atph	0.192527	0.023	0.00943998
atpc	atpf	0.146141	0.025	0.00908334
atpd	atpe	0.263655	0	0.00734779
atpd	atpf	0.230008	0	0.00734779
atpd	atpg	0.632157	0.272	0.0122817
atpd	atph	0.266893	0.069	0.00891308
atpd	fabd	0.263	0.181	0.01
atpd	gmk	0.267616	0.267	0.0094205
atpd	gyrb	0.261758	0.073	0.0105295
atpd	rpoc	0.516279	0.136	0.00956518
atpd	ubia	0.239387	0.092	0.00905707
atpe	atpf	0.325261	0.104	0.0167579
atpe	atpg	0.297057	0.072	0.0176237
atpe	atph	0.184557	0.022	0.0152781
atpf	atpg	0.440549	0.302	0.0109378
atpf	atph	0.381308	0.286	0.0580211
atpf	ppa	0.177994	0	0.00734779
atpf	rpoa	0.194549	0	0.00734779
atpf	secy	0.285457	0.054	0.00991031
atpf	yidc	0.278945	0.055	0.00932729
atpg	atph	0.238891	0.14	0.00951826
atpg	msba	-	-	-
atpg	rpia	0.295327	0.072	0.0292439
bama	bamd	0.822161	0.589	0.60002
bama	cdsa	0.406	0.021	0.008
bama	lepb	0.255	0.154	0.009
bama	lola	0.626	0.159	0.009
bama	lolb	0.684	0.187	0.009
bama	lolc	0.52	0.034	0.009
bama	lole	0.268	0.054	0.009
bama	lptd	0.272	0.201	0.009
bama	lpte	0.333	0.069	0.01
bama	lpxd	0.265	0.182	0.009
bama	yidc	0.332902	0.142	0.00996127
bamd	lola	0.435	0.12	0.026
bamd	lptd	0.309	0.035	0.009
bamd	lpte	0.257	0.122	0.014
bira	dapb	0.210256	0.35	0.00979264
bira	fabd	0.230488	0.113	0.00844075
bira	fola	0.307938	0.295	0.0119633
bira	hemd	0.228876	0.107	0.00975163
bira	metk	0.31335	0.074	0.00905522
bira	murb	0.308313	0.459	0.0105942
bira	nade	0.237609	0.412	0.00980231
cdsa	lpxd	0.213611	0.136	0.00931695
cdsa	pgsa	0.262279	0.028	0.00912291
cdsa	plsc	0.812961	0.235	0.0151239
cdsa	pssa	0.299278	0.142	0.00934874
cmk	dnaq	0.703564	0.281	0.0220167
cmk	isph	0.255627	0.235	0.00949228
cmk	ndk	0.274731	0.166	0.0100065
cmk	nrda	0.366454	0.066	0.00904267
cmk	nrdb	0.273646	0.192	0.00857384
cmk	pnp	0.276915	0.054	0.00959298
cmk	pyrh	0.204011	0.195	0.00972491
cmk	ribf	0.237579	0.275	0.00975281
coaa	coad	0.307707	0.098	0.0095468
coabc	coad	0.209	0.099	0.009
coabc	coae	0.209499	0.105	0.00933502
coad	coae	0.291444	0.206	0.0104694
coad	pdxj	0.237239	0.025	0.00995943
coad	ribf	0.264065	0.073	0.00990759
coad	waaa	0.309358	0.174	0.013787
coae	folc	0.286476	0.312	0.00957018
coae	ribf	0.264416	0.22	0.00875482
dapa	dapb	0.265746	0	0.00734779
dapa	dapd	0.266844	0.087	0.00990709
dapa	dapf	0.328192	0.11	0.0121991
dapb	dapd	0.192519	0.045	0.00939027
dapb	dape	0.21632	0.055	0.0100812
dapb	dapf	0.213397	0.081	0.00961912
dapb	lysc	0.1973	0.028	0.0088302
dapd	dape	0.26948	0.061	0.00961987
dapd	dapf	0.298382	0.311	0.0133942
dape	dapf	0.561458	0	0.00734779
dape	glms	0.277316	0.186	0.0107836
dapf	mure	0.268672	0.204	0.0103173
dapf	murf	0.251383	0.302	0.009306
dapf	muri	0.246027	0.277	0.0107571
dnaa	dnab	0.291385	0.287	0.00912887
dnaa	dnac	0.218954	0.124	0.00941008
dnaa	dnae	0.302219	0.037	0.00985521
dnaa	dnag	0.209878	0.216	0.00920102
dnaa	dnan	0.239329	0.192	0.00950672
dnaa	dnax	0.301555	0.273	0.00906747
dnaa	ftsz	0.288497	0.125	0.00961472
dnaa	gyra	0.265384	0.151	0.0096004
dnaa	gyrb	0.227806	0.119	0.00928658
dnaa	yidc	0.224575	0.024	0.0100592
dnab	dnac	0.650406	0.511	0.443602
dnab	dnae	0.294003	0.058	0.00985659
dnab	dnag	0.369937	0.134	0.020488
dnab	dnan	0.232865	0.296	0.00945334
dnab	dnax	0.449629	0.18	0.0427336
dnab	hola	0.197388	0.077	0.00948903
dnab	murj	0.251979	0.18	0.00900065
dnab	pria	0.275839	0.243	0.0100146
dnac	dnag	0.246206	0.156	0.0090508
dnae	dnag	0.294389	0.141	0.00946685
dnae	dnan	0.782541	0.259	0.595446
dnae	dnax	0.505984	0.586	0.426979
dnae	hola	0.404745	0.093	0.00949872
dnae	holb	0.28907	0.054	0.00907751
dnae	lexa	0.362326	0.061	0.00936663
dnae	lpxb	0.555041	0.068	0.0113802
dnae	rpoc	-	-	-
dnag	dnan	0.400316	0.156	0.0109726
dnag	dnax	0.330497	0.182	0.0270407
dnag	holb	0.198049	0.179	0.00942499
dnag	rpob	0.543785	0.506	0.0102388
dnag	rpoc	-	-	-
dnag	sucb	0.252881	0.12	0.0110318
dnag	tsf	0.232783	0.372	0.0100042
dnak	grpe	0.654165	0.417	0.0241837
dnak	gyra	0.245865	0.414	0.00911085
dnak	gyrb	0.498362	0.494	0.00902905
dnak	hscb	0.822928	0.443	0.634072
dnak	pnp	0.280299	0.172	0.00893841
dnak	rpoc	0.35635	0.147	0.00976272
dnak	rpoh	0.552	0.227	0.016
dnak	secy	0.335	0.1	0.015
dnan	dnaq	0.720612	0.266	0.511139
dnan	dnax	0.78582	0.389	0.115184
dnan	dut	0.287127	0.085	0.0103379
dnan	gyra	0.276158	0.036	0.0114096
dnan	gyrb	0.24497	0.131	0.00938959
dnan	hemd	0.281613	0.231	0.01173
dnan	hola	0.727265	0.282	0.424936
dnan	holb	0.8348	0.451	0.723936
dnan	ndk	0.62636	0.158	0.0283605
dnan	nrda	0.331451	0.042	0.00932164
dnan	pola	0.813	0.15	0.475751
dnan	rep	0.294731	0.16	0.0100402
dnan	rpoc	0.353555	0.022	0.00895056
dnan	suca	0.283795	0.091	0.010036
dnan	thya	0.258246	0.112	0.0104663
dnan	yidc	0.369409	0.134	0.00994773
dnaq	dnax	0.217423	0.143	0.00820404
dnaq	hola	0.185767	0.024	0.0112973
dnaq	holb	0.250866	0.282	0.00925102
dnaq	rnha	0.226821	0.066	0.00961127
dnax	dxs	0.274848	0.071	0.00953833
dnax	gyra	0.500375	0.236	0.0109137
dnax	gyrb	0.41574	0.049	0.00890574
dnax	hola	0.779094	0.281	0.699045
dnax	holb	0.811082	0.572	0.208748
dut	ndk	0.194727	0.032	0.00931442
dut	nrda	0.33121	0.043	0.00982435
dut	thya	0.216032	0.019	0.00734779
dut	tmk	0.244076	0.026	0.00888195
dxr	dxs	0.266615	0.12	0.00915815
dxr	ispd	0.294893	0.032	0.0098217
dxr	ispe	0.244149	0.15	0.00934721
dxr	ispf	0.23488	0.37	0.0100335
dxr	ispg	0.206504	0	0.00734779
dxr	isph	0.890097	0.423	0.0103813
dxs	ispd	0.292951	0.115	0.00986847
dxs	ispe	0.271537	0.149	0.00965349
dxs	ispf	0.36402	0.194	0.0115575
dxs	ispg	0.247459	0.354	0.00950297
dxs	isph	0.863804	0.256	0.0168966
dxs	ribf	0.282155	0.104	0.00904866
eno	pgk	0.243758	0.158	0.00947113
eno	pyrg	0.280652	0.24	0.00958151
era	murb	0.225034	0.191	0.00980518
erpa	hsca	0.366226	0.184	0.0152397
erpa	hscb	0.334852	0.1	0.0147495
faba	fabb	0.271844	0	0.00734779
faba	fabd	0.277488	0.018	0.00734779
faba	fabg	0.223079	0.112	0.00975039
faba	fabi	0.236808	0	0.00734779
faba	fabz	0.933954	0.645	0.872542
faba	lpxa	0.316467	0	0.00734779
fabb	fabd	0.301182	0.019	0.00734779
fabb	fabg	0.25921	0.024	0.00953467
fabb	fabi	0.246161	0.018	0.00734779
fabb	fabz	0.273944	0	0.00734779
fabb	lipa	0.261812	0.071	0.00845303
fabd	fabg	0.268101	0.109	0.00996249
fabd	fabi	0.2568	0	0.00734779
fabd	fabz	0.288852	0	0.00734779
fabg	fabi	0.917848	0.666	0.227606
fabg	fabz	0.196076	0	0.00734779
fabi	fabz	0.225657	0	0.00734779
fabz	lpxa	0.289719	0	0.00734779
fabz	lpxb	0.305362	0.066	0.00916087
fabz	lpxc	0.266526	0.108	0.0100459
fabz	lpxd	0.21746	0.029	0.00971362
fabz	lpxh	0.262362	0.073	0.0100607
fabz	pyrh	0.23515	0.018	0.00734779
fdx	hsca	0.305575	0.095	0.0094113
fola	folc	0.308401	0.23	0.0103999
fola	hsca	0.376692	0.191	0.00988492
fola	pdxa	0.26995	0.22	0.0107853
fola	thya	0.28236	0.249	0.0100157
folb	folc	0.313419	0.135	0.0113687
folb	fole	0.265262	0.042	0.0105015
folb	folk	0.466472	0.259	0.0119612
folc	fold	0.255692	0.324	0.00943543
folc	fole	0.256126	0.265	0.00942004
folc	folk	0.34224	0.218	0.0102521
folc	thya	0.240863	0.304	0.00938058
fold	thya	0.211083	0.262	0.00910289
fole	folk	0.271305	0.156	0.00953202
fole	riba	0.228974	0	0.00734779
fpr	ispg	0.676523	0.164	0.139949
ftsa	ftsb	0.266832	0.038	0.0122892
ftsa	ftsi	0.23031	0.698	0.00937735
ftsa	ftsk	0.526323	0.059	0.00954358
ftsa	ftsl	0.291671	0.041	0.0106473
ftsa	ftsq	0.2594	0.155	0.00957386
ftsa	ftsw	0.422602	0.084	0.0128887
ftsa	ftsz	0.602152	0.394	0.0180531
ftsa	mray	0.309491	0.109	0.0112561
ftsa	mrdb	0.322315	0.242	0.00873445
ftsa	mreb	0.721925	0.226	0.0103038
ftsa	mrec	0.312768	0.186	0.00935007
ftsa	murc	0.424921	0.128	0.00984955
ftsa	murd	0.246823	0.424	0.00934152
ftsa	mure	0.404417	0.221	0.0138979
ftsa	murf	0.238074	0.315	0.00871905
ftsa	murg	0.238	0.231	0.009
ftsa	rho	0.247305	0.142	0.00966359
ftsa	zipa	0.73708	0.243	0.0115751
ftsb	ftsi	0.659179	0.034	0.0224153
ftsb	ftsl	0.671798	0.666	0.437961
ftsb	ftsq	0.613207	0.434	0.387847
ftsb	ftsw	0.636004	0.183	0.048778
ftsb	ftsz	0.222308	0.02	0.0102621
ftsb	ispd	0.237013	0.127	0.00962831
ftsb	ispf	0.222946	0.064	0.0117758
ftse	ftsy	0.358505	0.216	0.0142245
ftse	ftsz	0.44379	0.228	0.0103591
ftsh	glmm	0.224782	0.121	0.0100216
ftsh	grpe	0.252512	0.03	0.0095625
ftsh	secy	0.481518	0.102	0.0100801
ftsh	yidc	0.307809	0.044	0.00873828
ftsi	ftsl	0.685104	0.242	0.0687385
ftsi	ftsq	0.244092	0.066	0.0102766
ftsi	ftsw	0.802541	0.6	0.554542
ftsi	ftsz	0.373484	0.162	0.0285901
ftsi	mray	0.470654	0.072	0.0104225
ftsi	mura	0.234456	0.425	0.00873938
ftsi	murc	0.251082	0.168	0.00953501
ftsi	murd	0.260889	0.054	0.00980577
ftsi	mure	0.428694	0.328	0.00981857
ftsi	murf	0.231537	0.587	0.0092382
ftsi	murg	0.252889	0.249	0.0088432
ftsi	rsmh	0.260238	0.211	0.00945154
ftsk	ftsq	0.671597	0.567	0.0847105
ftsk	ftsw	0.295446	0.095	0.00899253
ftsk	ftsz	0.276589	0.064	0.00850825
ftsk	lola	0.368196	0.09	0.0103331
ftsk	parc	0.598071	0.243	0.00914952
ftsk	pare	0.264037	0.019	0.00734779
ftsk	zipa	0.223211	0.07	0.00909744
ftsl	ftsq	0.27246	0.031	0.00833065
ftsl	ftsw	0.741519	0.325	0.405081
ftsl	ftsz	0.249803	0.035	0.00872913
ftsl	lptc	0.220454	0.055	0.0207015
ftsl	mray	0.307353	0.084	0.0102524
ftsl	mrda	0.363872	0.027	0.0101311
ftsl	mreb	0.322246	0.046	0.0119083
ftsl	murc	0.266	0.034	0.01
ftsl	murd	0.300514	0.075	0.0208096
ftsl	mure	0.570002	0.06	0.0115516
ftsl	murf	0.330025	0.101	0.0115132
ftsl	murg	0.264885	0.034	0.014974
ftsl	rsmh	0.25717	0.068	0.012217
ftsl	zipa	0.291147	0.13	0.0114825
ftsq	ftsw	0.290618	0.078	0.00984115
ftsq	ftsz	0.244192	0.265	0.0094632
ftsq	mray	0.294252	0.108	0.00926415
ftsq	mrda	0.251073	0.165	0.00859805
ftsq	mreb	0.265352	0.244	0.0111271
ftsq	murc	0.253703	0.299	0.0088393
ftsq	murd	0.271958	0.359	0.0100531
ftsq	mure	0.270455	0.477	0.0102859
ftsq	murf	0.239762	0.297	0.0102332
ftsq	murg	0.250337	0.253	0.0104519
ftsq	seca	0.260941	0.019	0.00911969
ftsq	sece	0.286837	0.078	0.014116
ftsq	secy	0.25626	0.061	0.00957894
ftsq	yidc	0.269585	0.07	0.0105446
ftsq	zipa	0.227984	0.056	0.0145971
ftsw	ftsz	0.239045	0.053	0.00822306
ftsw	mray	0.2601	0.114	0.00997557
ftsw	mrda	0.792748	0.54	0.511446
ftsw	mreb	0.237425	0.202	0.00930395
ftsw	mura	0.313818	0.05	0.00858864
ftsw	murb	0.252061	0.133	0.00975422
ftsw	murc	0.268114	0.04	0.00926473
ftsw	murd	0.38994	0.079	0.0134502
ftsw	mure	0.268625	0.212	0.00819308
ftsw	murf	0.258738	0.089	0.0105023
ftsw	murg	0.239955	0.069	0.0087311
ftsw	zipa	0.271079	0.22	0.00946257
ftsy	lold	-	-	-
ftsy	rpoh	0.482319	0.124	0.0129622
ftsy	seca	0.423885	0.211	0.0169193
ftsy	secb	0.255746	0.147	0.011581
ftsy	secd	0.210267	0	0.00734779
ftsy	sece	0.511936	0.059	0.0909492
ftsy	secy	0.305898	0.054	0.00865827
ftsy	yajc	0.270574	0.026	0.00824294
ftsy	yidc	0.241969	0.062	0.00893393
ftsz	gyra	0.264693	0.068	0.00907563
ftsz	gyrb	-	-	-
ftsz	lpxc	0.25107	0.324	0.0101681
ftsz	mray	0.249335	0.111	0.0100967
ftsz	mrdb	0.28208	0.081	0.0108228
ftsz	mreb	0.249717	0.241	0.00952129
ftsz	mrec	0.219211	0.147	0.00892035
ftsz	murc	0.238366	0.663	0.00956487
ftsz	murd	0.714235	0.573	0.015684
ftsz	mure	0.437513	0.22	0.0172037
ftsz	murf	0.2429	0.269	0.00911247
ftsz	murg	0.241545	0.255	0.00947209
ftsz	parc	0.552647	0.256	0.0497623
ftsz	seca	0.410447	0.244	0.0106048
ftsz	zipa	0.439249	0.286	0.0193077
glmm	glms	0.326047	0.115	0.00977447
glmm	glmu	0.287821	0.019	0.00934982
glmm	mura	0.628593	0.162	0.00993619
glmm	murc	0.275016	0.137	0.00911552
glmm	tpia	0.235514	0.057	0.00976533
glms	glmu	0.463055	0.021	0.018474
glmu	lpxa	0.669142	0.487	0.0098145
glmu	mura	0.218877	0.049	0.00945033
gmha	kdsb	0.197131	0	0.00734779
gmk	guab	0.409559	0.144	0.0101233
gmk	ndk	0.241321	0.127	0.0116032
gmk	nrda	0.357462	0.036	0.00978448
gmk	nrdb	0.34065	0.125	0.0102514
gmk	pnp	0.310707	0.091	0.00937073
gmk	pyrd	0.253661	0.548	0.00957502
gmk	pyrh	0.199233	0.022	0.0091066
gmk	tmk	0.23096	0.174	0.00934915
grpe	hola	0.229868	0.077	0.0103153
grpe	hsca	0.302738	0.043	0.0105077
grpe	rpoh	0.174628	0.144	0.00990661
grpe	sucb	0.191325	0.03	0.00734779
guab	pyrd	0.262695	0.094	0.00992964
guab	pyrh	0.283412	0.05	0.0106856
guab	rpoh	0.379513	0.054	0.011066
gyra	folp	0.847	0.238	0.219
gyra	gyrb	0.714821	0.652	0.45883
gyra	liga	0.233538	0.101	0.00908708
gyra	metk	0.268759	0.025	0.0132391
gyra	mreb	0.312353	0.094	0.0109026
gyra	parc	0.780048	0.673	0.793161
gyra	pare	0.569326	0.599	0.075813
gyra	rpoc	-	-	-
gyra	seca	0.36203	0.083	0.00841967
gyra	secy	0.304721	0.047	0.00927957
gyra	topa	0.731281	0.317	0.00960842
gyrb	holb	0.221171	0.383	0.00920063
gyrb	liga	0.215379	0.19	0.00885704
gyrb	metk	0.359072	0.024	0.00970348
gyrb	parc	0.704432	0.479	0.193765
gyrb	pyrg	0.267432	0.245	0.00862851
gyrb	rnha	0.297516	0.065	0.00915157
gyrb	rpob	-	-	-
gyrb	rpoc	-	-	-
gyrb	rpoh	-	-	-
gyrb	seca	0.2589	0.09	0.00886326
gyrb	topa	0.257732	0.049	0.00842472
gyrb	ubia	0.281741	0.27	0.0108378
gyrb	yidc	0.258657	0.026	0.00836521
hemb	hemc	0.31526	0.146	0.012741
hemb	hemd	0.239093	0.275	0.00982414
hemb	heme	0.210573	0.019	0.00734779
hemb	heml	0.216726	0	0.00734779
hemc	hemd	0.411647	0.184	0.0151762
hemc	heme	0.715558	0.098	0.0104124
hemc	heml	0.237915	0.202	0.00844772
hemd	heme	0.236742	0.511	0.0106508
hemd	hemh	0.255203	0.21	0.0132716
hemd	heml	0.594053	0.106	0.00972753
heme	hemh	0.268753	0.21	0.00934716
heme	heml	0.223148	0.066	0.00944552
heme	tonb	0.319865	0.157	0.0118427
hemg	hemh	0.274547	0.458	0.0109483
hola	holb	0.8143	0.41	0.773244
hola	lpte	0.307601	0.194	0.0101093
hola	nadd	0.299698	0.164	0.0155637
holb	pare	0.257994	0.287	0.00956299
holb	tmk	0.224092	0.1	0.00919181
hsca	hscb	0.843694	0.435	0.421426
hsca	parc	0.253541	0.112	0.00909246
hsca	pgk	0.227752	0.28	0.00957177
hsca	rpoa	0.276983	0.134	0.00959564
hsca	rpob	0.594481	0.361	0.00927725
hsca	rpoh	0.277643	0.139	0.0108812
hsca	secy	0.445369	0.105	0.00975115
infa	prfa	0.40557	0.051	0.0235272
infa	rpoc	0.377152	0	0.00734779
infa	secy	0.359911	0.052	0.00850519
infa	tsf	0.465702	0.064	0.0110416
ispb	ubia	0.227907	0.048	0.00945088
ispd	ispe	0.227736	0.251	0.00969684
ispd	ispf	0.423879	0.038	0.0231589
ispd	ispg	0.227127	0.124	0.00952988
ispd	isph	0.855676	0.24	0.725256
ispd	murc	0.261246	0.301	0.00949807
ispe	ispf	0.302071	0.083	0.0141731
ispe	ispg	0.243931	0.071	0.00945093
ispe	isph	0.261873	0.2	0.0125926
ispe	lolb	0.264883	0.26	0.00996415
ispf	ispg	0.27616	0.1	0.0101387
ispf	isph	0.810277	0.306	0.0327998
ispf	metk	0.347055	0.065	0.0137379
ispf	murc	0.244658	0.134	0.0101259
ispg	isph	0.242846	0.129	0.00959131
isph	lspa	0.317589	0.06	0.0120238
isph	ribf	0.403893	0.365	0.00949351
kdsa	kdsb	0.192621	0.028	0.00971853
kdsa	lpxa	0.273846	0.021	0.00977994
kdsa	lpxb	0.371	0.123	0.0124537
kdsa	lpxc	0.343962	0.105	0.0137346
kdsa	lpxd	0.194338	0.051	0.00961517
kdsa	lpxk	0.241467	0.137	0.00958492
kdsa	waaa	0.283795	0.12	0.010519
kdsb	lpxa	0.193335	0.455	0.00995685
kdsb	lpxb	0.257813	0.072	0.0100985
kdsb	lpxc	0.239941	0.187	0.00958796
kdsb	lpxd	0.269327	0.019	0.00927405
kdsb	lpxk	0.227274	0.098	0.0090352
kdsb	waaa	0.312445	0.09	0.0105452
lepb	pdxj	0.244369	0.122	0.00950691
lepb	secy	0.245647	0.123	0.00880958
lepb	yidc	0.370273	0.229	0.015488
lgt	lnt	0.25522	0.276	0.00974955
lgt	thya	0.259031	0.238	0.0121609
liga	zipa	0.246099	0.223	0.00923741
lnt	lola	0.374295	0.177	0.00893122
lnt	lolb	0.357317	0.144	0.00996836
lola	lolb	0.838207	0.562	0.737876
lola	lolc	0.809225	0.419	0.453011
lola	lold	-	-	-
lola	lole	0.424651	0.163	0.0129493
lola	lpta	0.487715	0.192	0.0540011
lola	lptd	0.335946	0.122	0.00907919
lola	lpte	0.254289	0.156	0.0113648
lola	lptf	0.342028	0.119	0.00995259
lolb	lolc	0.335486	0.162	0.0144823
lolb	lold	-	-	-
lolb	lole	0.264398	0.084	0.00863971
lolb	lptd	0.6493	0.217	0.00946717
lolb	lptf	0.221108	0.046	0.0112271
lolc	lold	-	-	-
lolc	lole	0.689631	0.51	0.137229
lold	lole	-	-	-
lpta	lptb	0.273739	0.125	0.00870469
lpta	lptc	0.715561	0.511	0.566987
lpta	lptd	0.724871	0.404	0.392781
lpta	lpte	0.397065	0.165	0.0134476
lptb	lptc	-	-	-
lptb	lptf	-	-	-
lptc	lptd	0.69502	0.369	0.0429425
lptc	lpte	0.298065	0.07	0.0184409
lptc	lptf	0.675467	0.35	0.211184
lptc	lptg	0.366791	0.065	0.0147629
lptd	lpte	0.862827	0.719	0.855434
lptd	lptf	0.274722	0.091	0.0105805
lptd	lptg	0.265367	0.185	0.00939037
lptd	lpxc	0.345451	0.257	0.00937932
lptd	lpxh	0.387715	0.058	0.00934675
lpte	lptf	0.22508	0.201	0.00898648
lpte	lptg	0.342133	0.066	0.00920903
lpte	nadd	0.249317	0.102	0.0105816
lptf	lptg	0.678586	0.435	0.18544
lpxa	lpxb	0.233715	0.066	0.00967496
lpxa	lpxc	0.26624	0.179	0.0109061
lpxa	lpxd	0.608127	0.491	0.0390308
lpxa	lpxh	0.216901	0.31	0.0106096
lpxa	lpxk	0.226723	0.31	0.0105857
lpxa	mura	0.262121	0.087	0.00949879
lpxa	pyrh	0.227798	0.089	0.00849497
lpxa	waaa	0.254088	0.156	0.0104181
lpxb	lpxc	0.301215	0.138	0.00929546
lpxb	lpxd	0.227607	0.23	0.00846504
lpxb	lpxh	0.260153	0.178	0.00903371
lpxb	lpxk	0.231364	0.132	0.00924003
lpxb	waaa	0.533849	0.121	0.00894636
lpxc	lpxd	0.227324	0.135	0.00937432
lpxc	lpxh	0.451624	0.176	0.0100738
lpxc	lpxk	0.304383	0.109	0.00949818
lpxc	mray	0.322222	0.061	0.0103238
lpxc	murd	0.303592	0.238	0.0102088
lpxc	mure	0.273068	0.166	0.0100019
lpxc	murg	0.263515	0.305	0.0104033
lpxc	rpoh	0.243631	0.228	0.0106708
lpxc	waaa	0.697036	0.213	0.0105745
lpxd	lpxh	0.213418	0.018	0.00734779
lpxd	lpxk	0.224592	0.195	0.00973358
lpxd	pyrh	0.191116	0.325	0.00975073
lpxd	waaa	0.223439	0.219	0.00943908
lpxh	lpxk	0.217139	0.096	0.0126652
lpxh	waaa	0.219655	0.172	0.00967951
lpxk	waaa	0.227129	0.137	0.0204343
lspa	murj	0.395861	0.149	0.0122703
lspa	ribf	0.244613	0.071	0.00870987
metk	mreb	0.257858	0.048	0.00934047
metk	parc	0.275596	0.021	0.00983225
metk	pgk	0.243602	0.155	0.00943722
metk	pyrg	0.27144	0.05	0.00980431
metk	rpe	0.29124	0.055	0.0137973
metk	sucb	0.319746	0.027	0.01249
metk	tpia	0.275862	0	0.00734779
mray	mrec	0.260983	0.064	0.00870737
mray	mred	0.24633	0.068	0.00905753
mray	mura	0.484391	0.046	0.0215185
mray	murc	0.532063	0.1	0.0108394
mray	murd	0.307223	0.064	0.0137477
mray	mure	0.282822	0.065	0.0100684
mray	murf	0.301387	0.158	0.0106352
mray	murg	0.229439	0.227	0.0090476
mray	rsmh	0.255682	0.036	0.00857083
mrda	mrdb	0.862226	0.649	0.730502
mrda	mreb	0.289778	0.218	0.00880165
mrda	mrec	0.608042	0.334	0.100976
mrda	mred	0.419179	0.105	0.0107075
mrdb	mreb	0.565921	0.1	0.011118
mrdb	mrec	0.514352	0.058	0.00967262
mrdb	mred	0.258272	0.174	0.00881539
mrdb	mura	0.311999	0.047	0.00933236
mrdb	murf	0.307142	0.099	0.0114762
mrdb	murg	0.267546	0.087	0.00931763
mreb	mrec	0.236486	0.213	0.00903404
mreb	mred	0.288856	0.147	0.0113194
mreb	murg	0.243904	0.244	0.00980029
mreb	nrdb	0.238071	0.041	0.0103426
mrec	mred	0.799108	0.508	0.324377
mrec	murg	0.255504	0.17	0.00942678
mred	murg	0.308051	0.083	0.00971062
msba	secy	-	-	-
mukb	mukf	-	-	-
mukb	parc	-	-	-
mura	murb	0.298166	0.3	0.00978692
mura	murc	0.275626	0.198	0.00983806
mura	murd	0.68994	0.259	0.0283979
mura	mure	0.414025	0.274	0.0140813
mura	murf	0.253734	0.15	0.00943263
mura	murg	0.283385	0.127	0.00987571
murb	murc	0.240689	0.696	0.00943975
murb	murd	0.240185	0.644	0.00936269
murb	mure	0.233932	0.521	0.00922277
murb	murf	0.232746	0.38	0.00939011
murb	murg	0.660335	0.379	0.00947501
murb	muri	0.233778	0.336	0.0100231
murc	murd	0.246933	0.57	0.00939122
murc	mure	0.236425	0.523	0.00919637
murc	murf	0.232385	0.362	0.00922933
murc	murg	0.251929	0.511	0.00960494
murc	rsmh	0.263135	0.108	0.00913509
murd	mure	0.247612	0.594	0.00979044
murd	murf	0.246847	0.561	0.00949057
murd	murg	0.273197	0.301	0.00938888
murd	muri	0.269721	0.332	0.00957508
mure	murf	0.24457	0.346	0.00909906
mure	murg	0.264494	0.52	0.00944359
mure	rsmh	0.748071	0.146	0.235032
murf	murg	0.243702	0.252	0.00917713
murf	parc	0.271082	0.088	0.00955957
murf	rsmh	0.234275	0.141	0.00931526
murj	ribf	0.267832	0.202	0.00997053
nadd	nade	0.243628	0.243	0.00977087
nadd	nadk	0.373617	0.124	0.0101305
nade	nadk	0.195318	0.227	0.00960459
ndk	nrda	0.734813	0.15	0.00996421
ndk	nrdb	0.708691	0.21	0.0606223
ndk	pnp	0.308236	0.174	0.0104301
ndk	pyrg	0.527638	0.031	0.0186615
ndk	pyrh	0.278929	0.03	0.0106616
ndk	riba	0.280795	0.066	0.00959983
ndk	rpoc	0.36533	0	0.00734779
ndk	tmk	0.302611	0.146	0.0103131
nrda	nrdb	0.850848	0.668	0.324175
nrda	pnp	0.279	0.283	0.009
nrda	pyrh	0.384531	0.033	0.012562
nrda	thya	0.329315	0.138	0.0092059
nrda	tmk	0.336081	0.084	0.0091737
nrdb	pnp	0.247898	0.066	0.00981982
nrdb	pyrh	0.233578	0.033	0.0101821
nrdb	tmk	0.258609	0.136	0.00934705
nusa	nusb	0.314291	0.597	0.00910453
nusa	nusg	0.649434	0.315	0.00953137
nusa	rpoc	0.33632	0.068	0.00957189
nusa	rpoh	0.316742	0.103	0.00967701
nusb	nusg	0.386885	0.095	0.0170762
nusb	rpoc	0.389164	0	0.00734779
nusb	thil	0.334323	0	0.00734779
nusg	rho	0.5947	0.101	0.0490136
nusg	rpoc	0.812235	0.196	0.157821
parc	pare	0.665424	0.603	0.417302
pare	rnha	0.226068	0.489	0.00876407
pare	rpoh	0.24176	0.174	0.00893724
pare	topa	0.262872	0.191	0.00868876
pare	ubia	0.227962	0.313	0.0102711
pdxa	pdxj	0.248011	0.03	0.00978552
pgk	rpob	0.315064	0.028	0.00734779
pgsa	plsc	0.319755	0.067	0.0132851
pgsa	psd	0.263307	0.058	0.00921685
pgsa	pssa	0.313081	0.025	0.0101464
plsb	plsc	0.3123	0.031	0.00947541
pnp	pyrh	0.258168	0.03	0.00985001
pnp	rpoc	0.323552	0.018	0.0100754
prfa	tsf	0.313054	0.167	0.0107218
pria	rnha	0.29297	0.036	0.0096604
psd	pssa	0.328091	0.198	0.0116804
pyrf	pyrh	0.201323	0	0.00734779
pyrg	pyrh	0.254461	0	0.00734779
pyrg	rpoc	-	-	-
pyrg	tsf	0.264067	0.182	0.0089152
pyrh	topa	0.307562	0.058	0.00823406
pyrh	tsf	0.233063	0.038	0.00870481
rho	rpoc	0.510815	0.054	0.00886742
riba	ribb	0.203496	0.102	0.00866617
riba	ribc	0.287028	0.203	0.00920949
riba	rpoc	0.344006	0.027	0.00944443
ribb	ribc	0.208612	0.249	0.00928399
ribc	ribf	0.250153	0.148	0.00934648
rimm	secy	0.258104	0.073	0.00963155
rimm	tsf	0.259117	0.088	0.0130567
rpoa	rpob	0.8713	0.626	0.388225
rpoa	rpoc	0.762171	0.393	0.576664
rpoa	rpoh	0.199422	0.076	0.00915649
rpoa	secy	0.300235	0.045	0.00898825
rpob	rpoc	0.917164	0.739	0.812945
rpob	rpoh	0.818884	0.461	0.00953943
rpob	secy	0.38854	0.13	0.00887627
rpoc	rpoh	0.865613	0.619	0.205545
rpoc	secy	0.384503	0	0.00734779
rpoc	thya	0.334939	0.02	0.00734779
rpoh	seca	0.296335	0.076	0.00931065
rpoh	secy	0.247421	0.074	0.00886562
rpoh	yidc	0.277221	0.044	0.00887431
seca	secd	0.297772	0.338	0.00927054
seca	sece	0.320576	0.019	0.00872702
seca	secy	0.750575	0.501	0.1356
seca	yajc	0.362181	0.026	0.012701
seca	yidc	0.300654	0.023	0.0084214
secb	secd	0.222196	0.097	0.0091468
secb	sece	0.17946	0.018	0.00734779
secb	secf	0.309209	0.036	0.0169009
secb	secy	0.268893	0.056	0.0159512
secb	yidc	0.580898	0.166	0.0117084
secd	sece	0.505594	0.064	0.0127142
secd	secf	0.799334	0.67	0.46111
secd	secy	0.549818	0.043	0.0482581
secd	yajc	0.368055	0.056	0.0112244
secd	yidc	0.364768	0.073	0.00933716
sece	secf	0.239986	0.032	0.00956135
sece	secy	0.713155	0.501	0.329191
sece	yajc	0.268945	0.06	0.0253628
sece	yidc	0.339752	0.067	0.00978119
secf	secy	0.228076	0.078	0.0100909
secf	yidc	0.464244	0.047	0.0104793
secy	tsf	0.249922	0.063	0.00857826
secy	yajc	0.312212	0.058	0.012193
secy	yidc	0.629144	0.076	0.0363223
suca	sucb	0.613997	0.46	0.015341
thya	tmk	0.238279	0.158	0.00953972
tsf	yidc	0.435338	0.082	0.0103384
ubia	ubib	0.27372	0.05	0.00870648
ubia	ubid	0.295723	0.09	0.00955496
ubia	ubie	0.238934	0.145	0.0102725
ubia	ubig	0.276843	0.083	0.0101542
ubia	ubih	0.30992	0.091	0.010728
ubib	ubie	0.29383	0.066	0.0103796
ubib	ubig	-	-	-
ubie	ubig	-	-	-
ubie	ubih	0.301268	0.102	0.0100211
ubig	ubih	0.820083	0.195	0.743331

## Sheet: Random_Gram-negative_PPIs
Supplementary Data, File 1. List of randomly generated Gram-negative PPIs modeled by AF2. Protein1 and Protein2 are the two proteins involved in the binary interaction. For each protein pair, the ipTM, pDockQ and pDockQ2 scores corresponding to the best model is provided.
Protein1	Protein2	ipTM	pDockQ	min pDockQ2
acca	dnab	0.229	0.1	0.00932321
acca	faba	0.239	0	0.00734779
acca	ftsw	0.576	0.043	0.00993794
acca	lepb	0.369	0.211	0.00943169
acca	lpxa	0.355	0.024	0.0103797
acca	nadd	0.312	0.15	0.00973462
acca	nadk	0.249	0.031	0.0124902
accb	cdsa	0.649	0.238	0.0157521
accb	coq7	0.255	0.108	0.0186095
accb	dxr	0.276	0	0.00734779
accb	faba	0.225	0.381	0.00993215
accb	gyrb	0.284	0.042	0.0109433
accb	lnt	0.431	0.058	0.0118086
accb	lolb	0.259	0.189	0.0139968
accb	mura	0.516	0.156	0.0180533
accb	nrda	0.65	0.157	0.0099482
accb	ribf	0.242	0.139	0.0105224
accb	rpoh	0.202	0.093	0.0100444
accb	sucb	0.293	0.236	0.0119545
accb	zipa	0.499	0.381	0.0131348
accc	coae	0.32	0.253	0.00874634
accc	folc	0.304	0.219	0.00989253
accc	ftsl	0.367	0.047	0.0153361
accc	ftsq	0.268	0.131	0.011979
accc	liga	0.252	0.279	0.00937762
accc	murj	0.244	0.318	0.00948664
accc	pyrg	0.238	0.382	0.00958347
accc	rimp	0.31	0.221	0.00922517
accd	acps	0.493	0.058	0.0102211
accd	cdsa	0.289	0.02	0.00734779
accd	coabc	0.19	0.097	0.00918934
accd	dnae	0.314	0.123	0.00934298
accd	plsc	0.255	0.044	0.0155418
accd	rpia	0.236	0.055	0.0103814
accd	tsf	0.348	0.091	0.010233
acpp	ftsq	0.444	0.09	0.0218251
acpp	hscb	0.314	0.062	0.0153744
acpp	ispb	0.314	0.065	0.0107978
acpp	mukf	0.432	0.132	0.00996853
acpp	suca	0.505	0.04	0.0100583
acps	accc	0.327	0.115	0.0103306
acps	cdsa	0.23	0	0.00734779
acps	def	0.218	0.052	0.0104406
acps	ftsa	0.309	0.122	0.0097426
acps	psd	0.543	0.276	0.0126306
acps	purb	0.348	0	0.00734779
acps	secd	0.209	0.101	0.00921623
adk	dapd	0.233	0.298	0.0098899
adk	ftsl	0.252	0.046	0.0155486
adk	heme	0.516	0.142	0.0298845
adk	hscb	0.362	0.099	0.0132558
adk	ispf	0.244	0.239	0.00961638
adk	lpte	0.468	0.157	0.0144463
adk	murg	0.295	0.313	0.00928215
adk	rpoc	0.344	0.018	0.00919513
adk	secf	0.277483	0.102	0.0123799
asd	era	0.246	0.31	0.00940868
asd	hscb	0.316	0.426	0.0099046
asd	lptf	0.282	0.135	0.00992279
asd	lysc	0.321	0.292	0.099689
asd	prla	0.234	0.284	0.00902466
asd	rpia	0.212	0.152	0.00982495
atpa	pgk	0.244	0.522	0.00962545
atpb	coq7	0.241	0.145	0.0119254
atpb	dnax	0.249	0.019	0.00734779
atpb	ftsi	0.335	0.047	0.00928802
atpb	gyrb	0.353	0.053	0.0092732
atpb	hemg	0.319	0.043	0.0120389
atpb	heml	0.257	0.032	0.00964582
atpb	ubid	0.278	0.021	0.0094761
atpc	murj	0.325	0.168	0.00923354
atpd	dape	0.256	0.273	0.00970315
atpd	dapf	0.265	0.318	0.00954767
atpd	grpe	0.235	0.044	0.00956238
atpd	guab	0.241	0.144	0.00962326
atpd	nrda	0.304	0.033	0.00888562
atpd	ppa	0.242	0.038	0.00920643
atpf	ispb	0.237	0.036	0.00944391
atpg	dapf	0.227	0.115	0.00902219
atpg	der	0.242	0.074	0.0123824
atpg	hemd	0.233	0.176	0.00928139
atpg	lpxc	0.229	0.132	0.00894174
atpg	rpoc	0.359	0	0.00734779
atpg	ubid	0.257	0.037	0.0114506
atpg	waaa	0.253	0.104	0.0100878
atph	dape	0.235	0.101	0.00988135
atph	ispd	0.312	0.131	0.0204846
atph	ispf	0.224	0.075	0.0103901
atph	lola	0.28	0.211	0.012513
bama	bira	0.253	0.465	0.00936107
bama	ftsh	0.279	0.035	0.00904295
bama	hscb	0.275	0.102	0.00891781
bama	pgsa	0.3	0.029	0.00974699
bama	plsb	0.294	0.033	0.00877055
bama	ppa	0.339	0.348	0.00964407
bama	sucb	0.261	0.135	0.00901731
bama	upps	0.324	0.151	0.00964018
bamd	dapa	0.277	0.078	0.0109913
bamd	eno	0.263	0.205	0.0102708
bamd	heml	0.273	0.09	0.00991162
bamd	lpxh	0.228	0.141	0.00988905
bira	hemg	0.28	0.117	0.0095881
bira	kdsb	0.259	0.226	0.00980093
bira	plsb	0.265	0.034	0.00922992
bira	thya	0.209	0.382	0.00955479
cdsa	coabc	0.183	0.503	0.00940017
cdsa	gyrb	0.255	0.05	0.00899262
cdsa	nade	0.212	0.02	0.00985869
cdsa	tmk	0.27	0.051	0.00895868
cdsa	tpia	0.228	0.06	0.0108785
cmk	dnab	0.236	0.289	0.00926639
cmk	ftsi	0.299	0.185	0.00893039
cmk	kdsa	0.286	0.153	0.0104886
cmk	lpxc	0.387	0.24	0.00976164
cmk	pare	0.232	0.305	0.00927889
cmk	rsmh	0.436	0.261	0.00939788
coaa	folb	0.338	0.064	0.00999998
coaa	lola	0.471	0.263	0.0108872
coabc	folc	0.231	0.312	0.0096163
coabc	ftsk	0.237	0.223	0.00940376
coabc	lpxd	0.194	0.543	0.00941861
coabc	pare	0.197	0.663	0.00944452
coabc	seca	0.257	0.187	0.00937922
coad	dnag	0.22	0.024	0.00875965
coad	folc	0.284	0.099	0.00938205
coad	glmm	0.33	0.148	0.0101035
coad	lepb	0.279	0.065	0.00893324
coad	lpte	0.218	0.091	0.00872406
coad	murg	0.237	0.291	0.00922251
coae	dnac	0.236	0.083	0.0101012
coae	fole	0.215	0.365	0.00911674
coae	lpte	0.431	0.235	0.0224616
coae	lysc	0.237	0.344	0.00928284
coae	mukf	0.21	0.112	0.00803408
coae	nadk	0.316	0.261	0.0104321
coae	parc	0.304	0.159	0.00894946
coae	prfa	0.564	0.263	0.332916
coq7	ftsa	0.31	0.206	0.00913024
coq7	ftsi	0.334	0.122	0.00873722
coq7	lysc	0.29	0.121	0.0145755
coq7	nadk	0.274	0.103	0.0110824
dapa	dnaa	0.226	0.225	0.0100551
dapa	gyrb	0.271	0.398	0.0100097
dapa	ispf	0.357	0.113	0.0107442
dapa	mrdb	0.31	0.09	0.156626
dapb	kdsa	0.249	0	0.00734779
dapb	liga	0.345	0.159	0.0102876
dapb	lptc	0.231	0.335	0.0100121
dapb	rne	0.226	0.02	0.00920355
dapb	seca	0.262	0.067	0.0102195
dapd	iscs	0.228	0.057	0.00959213
dapd	mray	0.225	0.238	0.00903445
dapd	murf	0.243	0.131	0.00902567
dapd	nadd	0.271	0.132	0.00938715
dapd	pdxj	0.221	0	0.00734779
dapd	pssa	0.284	0.07	0.0114919
dapd	ubia	0.25	0.239	0.0097851
dape	dnaj	0.211	0.056	0.00945119
dape	fabd	0.306	0.193	0.00961852
dape	holb	0.201	0.147	0.00941276
dape	kdsa	0.256	0.066	0.0093323
dape	kdsb	0.283	0.39	0.0107992
dape	mrec	0.245	0.079	0.00925543
dape	secf	0.471	0.305	0.00911033
dape	secy	0.236	0.181	0.00984931
dapf	fold	0.242	0.16	0.0100262
dapf	ftsa	0.304	0.225	0.0129207
dapf	gyra	0.274	0.125	0.0107229
dapf	lpte	0.231	0.183	0.0105367
dapf	metk	0.378	0.11	0.0108598
dapf	secf	0.336	0.078	0.00912464
def	folk	0.238	0.19	0.0120019
def	ftsw	0.261	0.037	0.00922507
def	muri	0.542	0.277	0.0191425
def	rsmh	0.355	0.077	0.0134841
def	sucb	0.541	0.046	0.0588625
der	dnac	0.521	0.055	0.0718126
der	dnae	0.367388	0.389	0.00931617
der	fabd	0.231	0.142	0.0103838
der	ftsw	0.307	0.142	0.0094117
der	hemc	0.221	0.238	0.00933323
der	hemg	0.244	0.123	0.00961589
der	ispg	0.2	0.149	0.00938592
der	nrda	0.322	0.095	0.00853189
der	secd	0.257	0.203	0.00936081
dnaa	ftsk	0.307	0.071	0.00945963
dnaa	glms	0.234	0.182	0.00997539
dnaa	glna	0.234	0.031	0.00953744
dnaa	hemh	0.232	0.177	0.00951107
dnaa	muri	0.203	0.643	0.00999258
dnaa	waaa	0.233	0.267	0.0092006
dnab	eno	0.232	0.509	0.00941492
dnab	iscs	0.232	0.055	0.00915594
dnab	pare	0.2	0.297	0.00911582
dnab	pola	0.248	0.27	0.00924753
dnab	prfa	0.194	0.033	0.00970123
dnac	dnae	0.373	0.037	0.0115012
dnac	eno	0.29	0.046	0.00920814
dnac	ftsz	0.233	0.057	0.00875853
dnac	gyrb	0.244	0.043	0.00881675
dnac	hemb	0.254	0.071	0.00994391
dnac	holb	0.246	0.082	0.00999043
dnac	mukb	0.255	0.018	0.00734779
dnac	pgsa	0.214	0.025	0.0107444
dnac	ribf	0.356	0.154	0.00984816
dnac	rpoh	0.313	0.081	0.00949635
dnac	tmk	0.404	0.093	0.0113975
dnac	yfio	0.199	0.099	0.00956508
dnac	yidc	0.255	0.023	0.0086907
dnae	ftsl	0.376	0.025	0.0127831
dnae	guab	0.305	0.091	0.00930082
dnae	muri	0.359	0.164	0.0176332
dnae	pare	0.301	0.082	0.0081655
dnag	fabd	0.215	0.206	0.0104943
dnag	hemb	0.212	0.1	0.00965459
dnag	lexa	0.254	0.05	0.00921218
dnag	muri	0.219	0.071	0.00957062
dnag	pare	0.206	0.22	0.00858285
dnag	pnp	0.243	0.091	0.00911661
dnag	ppa	0.285	0.062	0.00935546
dnaj	ribb	0.2	0.049	0.00913709
dnan	glms	0.273	0.046	0.0121971
dnan	ispg	0.246	0.086	0.0109269
dnan	liga	0.224	0.339	0.00968622
dnan	lolb	0.342	0.183	0.0158702
dnan	mrdb	0.468	0.091	0.0135313
dnan	mukf	0.382	0.047	0.00908998
dnan	murb	0.262	0.393	0.0104855
dnan	rsmh	0.291	0.093	0.0119206
dnaq	folc	0.391	0.346	0.0155389
dnaq	ftsa	0.433	0.157	0.0094369
dnaq	glmm	0.251	0.057	0.00927834
dnaq	infa	0.337	0.071	0.0122723
dnaq	pdxj	0.207	0.18	0.0093611
dnaq	prfa	0.188	0.129	0.00931873
dnaq	secf	0.229	0.162	0.00930721
dnaq	yfio	0.358	0.092	0.00898967
dnax	fabz	0.321	0.023	0.00880012
dnax	isph	0.293	0.188	0.0103307
dnax	lolc	0.337	0.055	0.00830027
dnax	lpxh	0.221	0.143	0.00925042
dnax	riba	0.261	0.044	0.00912884
dnax	rpoc	0.336	0.07	0.0094638
dut	ribc	0.245	0.48	0.009
dut	rpoc	0.341	0	0.00734779
dxr	ftsb	0.274	0.116	0.0101658
dxr	kdsa	0.215	0.064	0.00934161
dxr	lola	0.278	0.205	0.0111187
dxr	metk	0.212	0	0.00734779
dxr	mura	0.264	0.082	0.008
dxr	pgsa	0.306	0.022	0.0102714
dxs	fabz	0.369	0.035	0.00866645
dxs	fusa	0.599	0.156	0.00951177
dxs	tsf	0.317	0.244	0.00908459
eno	ftsw	0.314	0.072	0.00844471
eno	ftsy	0.246	0.214	0.0088364
eno	lptd	0.317	0.042	0.00911932
eno	lpxk	0.274	0.263	0.00906761
eno	mreb	0.267	0.259	0.00935067
eno	murd	0.272	0.332	0.0103073
eno	murf	0.235	0.506	0.00923117
eno	nrdb	0.256	0.21	0.00946859
era	fabi	0.212	0.05	0.00883572
era	heml	0.227	0.194	0.00895936
era	infa	0.252	0.062	0.00880248
era	lptc	0.2	0.149	0.00911669
era	lptf	0.246	0.14	0.00937336
era	mura	0.275	0.181	0.0092217
erpa	hemb	0.369	0.135	0.0105192
erpa	murd	0.392	0.161	0.0124835
faba	ftsw	0.308	0.035	0.00876561
faba	lepb	0.3	0.093	0.0105396
faba	mrda	0.338	0.264	0.00923178
faba	secb	0.296	0.044	0.0284381
fabb	glmu	0.28	0.019	0.0104286
fabb	hola	0.345	0.165	0.0109895
fabb	nrda	0.402	0.039	0.0100957
fabb	thil	0.229	0.072	0.00967196
fabb	thya	0.22	0.548	0.00943012
fabd	folc	0.444	0.248	0.00989895
fabd	lpte	0.271	0.225	0.0150234
fabd	mukf	0.209	0.034	0.0102413
fabd	mura	0.291	0.288	0.00989865
fabd	nadd	0.266	0.105	0.00962406
fabd	nrdb	0.294	0.137	0.0102402
fabd	seca	0.271	0.319	0.00972294
fabd	waaa	0.336	0.069	0.012064
fabg	isph	0.268	0.32	0.0122115
fabg	lptf	0.242	0.021	0.0102474
fabi	kdsb	0.214	0.035	0.00946856
fabi	mrec	0.206	0	0.00734779
fabi	plsc	0.241	0.042	0.00896627
fabz	ftsk	0.279	0.025	0.00904092
fabz	glms	0.439	0	0.00734779
fabz	lptc	0.227	0.058	0.0097735
fabz	lpte	0.437	0.094	0.00972599
fabz	secf	0.541	0.188	0.0205315
fabz	yidc	0.318	0.019	0.00734779
fdx	dnax	0.703	0.253	0.0199603
fdx	lnt	0.484	0.103	0.0115032
fis	isph	0.359	0.083	0.0128675
fis	murb	0.285	0.095	0.0101218
fis	pyrg	0.313	0.023	0.0110421
fis	rpia	0.255	0.052	0.0135382
fola	dnac	0.227	0.056	0.0093962
fola	hemc	0.732	0.218	0.283228
fola	hola	0.422	0.225	0.0242864
fola	iscs	0.325	0.163	0.00969135
fola	lipa	0.27	0.157	0.0102132
fola	lptf	0.436885	0.072	0.022432
fola	lpxd	0.23	0.073	0.0103903
fola	murc	0.305	0.353	0.00956677
fola	rpoh	0.33	0.105	0.0245183
folb	dapa	0.34	0.132	0.0159477
folb	dnae	0.233	0.308	0.009
folb	lold	0.324	0.126	0.00958469
folb	lpxb	0.293	0.062	0.00857301
folb	mukb	0.265	0	0.00734779
folb	parc	0.308	0.196	0.00850829
folc	murb	0.602	0.252	0.023927
folc	nadd	0.316	0.243	0.0126707
fold	ftsk	0.345	0.081	0.008116
fold	lexa	0.238	0.207	0.00946882
fold	murc	0.25	0.057	0.00925207
fold	prla	0.227	0.17	0.00990557
fold	zipa	0.217	0.194	0.00967106
fole	ftsh	0.236	0.1	0.00909405
fole	ndk	0.265	0.102	0.0111913
folk	fusa	0.321	0.077	0.00872612
folk	rpoa	0.188957	0.333	0.00954405
folp	guab	0.271	0.098	0.00911803
folp	mrec	0.225	0.146	0.00885105
folp	ribf	0.231	0.119	0.00942439
folp	topa	0.324	0.046	0.0091287
folp	ubig	0.229	0.168	0.00900305
ftsa	hemc	0.489	0.078	0.0120293
ftsa	rpoh	0.315	0.15	0.00996184
ftsb	ftsw	0.598	0.19	0.0670894
ftsb	infa	0.167	0.05	0.0105003
ftsb	mura	0.481	0.076	0.0147162
ftsb	pssa	0.296	0.03	0.0105996
ftsb	waaa	0.31	0.052	0.0216901
ftse	glmm	0.349	0.112	0.0102426
ftse	hscb	0.239	0.193	0.0109417
ftse	lpte	0.256	0.1	0.0105309
ftse	lysc	0.239	0.04	0.00910892
ftse	pssa	0.293	0.145	0.00904104
ftse	rho	0.277	0.296	0.0092766
ftsh	lolc	0.435	0.163	0.00872584
ftsh	muri	0.231	0.119	0.00943825
ftsh	plsc	0.409	0.075	0.0107201
ftsh	topa	0.254	0.043	0.00829239
ftsi	glmu	0.227	0.067	0.0103629
ftsi	heml	0.253	0.221	0.00937743
ftsi	nadd	0.278	0.211	0.00900082
ftsi	nrdb	0.227	0.273	0.00966125
ftsi	ubib	0.236	0.234	0.0104072
ftsk	iscs	0.285	0.134	0.00932286
ftsk	lpta	0.23	0.02	0.00792247
ftsk	lptc	0.285	0.071	0.00918364
ftsk	lptf	0.476	0.18	0.012053
ftsl	ftsy	0.225	0.029	0.00987855
ftsl	infa	0.169	0.028	0.0100837
ftsl	psd	0.525	0.115	0.120222
ftsl	ribb	0.217	0	0.00734779
ftsl	rpoa	0.187	0.02	0.00988376
ftsl	rpoh	0.214	0.052	0.0090143
ftsl	ubig	0.238	0.04	0.0110448
ftsl	upps	0.228	0.06	0.0126036
ftsq	fold	0.229	0.131	0.00967264
ftsq	glmu	0.259	0.02	0.00969716
ftsq	heme	0.292	0.273	0.011299
ftsq	pare	0.228	0.112	0.00984799
ftsq	secd	0.252	0	0.00734779
ftsq	ubie	0.279	0.197	0.0100188
ftsq	waaa	0.226	0.182	0.00934972
ftsw	glms	0.255	0.026	0.0102667
ftsw	lptf	0.323	0.103	0.0108309
ftsw	nrdb	0.299	0.055	0.00938275
ftsw	pnp	0.311	0.02	0.013213
ftsw	upps	0.276	0.051	0.00928168
ftsy	lolc	0.251	0.035	0.00896205
ftsy	lptf	0.411	0.105	0.00967322
ftsy	mrec	0.221	0.176	0.0093957
ftsy	murd	0.312	0.243	0.00941577
ftsy	secf	0.22	0.041	0.00917091
ftsz	lpta	0.267	0.085	0.00862841
ftsz	rho	0.303	0.129	0.0135721
ftsz	secd	0.228	0.171	0.00954189
fusa	gyrb	0.238	0.024	0.00946754
fusa	mure	0.433	0.177	0.00938814
glmm	grpe	0.241	0.023	0.00734779
glmm	ispd	0.328	0.078	0.0126086
glmm	ispe	0.83	0.259	0.0103873
glmm	kdsa	0.332	0.035	0.00995517
glmm	lepb	0.26	0.339	0.0105482
glmm	lpxc	0.287	0.233	0.0109185
glmm	yidc	0.375	0.148	0.0230124
glms	iscs	0.216	0	0.00734779
glms	lpxk	0.236	0.229	0.00962586
glms	mrec	0.233	0.042	0.00938259
glms	plsc	0.278	0.063	0.00856428
glms	seca	0.263	0.065	0.0100608
glms	thil	0.232	0.102	0.00993327
glmu	lptd	0.261	0.092	0.00893802
glmu	mukf	0.22	0.064	0.00813857
glna	lpte	0.242	0.402	0.009701
glna	pare	0.231	0.184	0.00957751
glna	riba	0.238	0.169	0.00909366
gmha	prfa	0.259	0.055	0.00974834
gmk	parc	0.282	0.047	0.00901278
groel	pgk	0.234233	0.562	0.00937301
groes	murf	0.417783	0.148	0.0120016
grol	lptf	0.604289	0.218	0.0104877
gros_1	ispf	0.267745	0.104	0.0140049
grpe	iscs	0.245	0.019	0.00829226
grpe	isph	0.239	0.051	0.0100593
grpe	mray	0.223	0.031	0.00933223
grpe	pyrg	0.259	0.182	0.00983128
guab	hemd	0.562	0.15	0.0759622
guab	isph	0.736	0.101	0.0827961
guab	lpxh	0.282	0.083	0.00954343
guab	mure	0.248	0.099	0.00936532
guab	secd	0.311	0.185	0.00912731
guab	tsf	0.249	0.127	0.0101284
gyra	hemc	0.248	0.042	0.00814345
gyra	holb	0.234	0.103	0.00965132
gyra	nrdb	0.275	0.054	0.00904958
gyra	yfio	0.267	0.074	0.00921869
gyrb	lpxk	0.245	0.177	0.00829045
gyrb	rnha	0.294	0.076	0.009
gyrb	secd	0.223	0.059	0.00894949
gyrb	zipa	0.285	0.167	0.00791055
hemc	ispg	0.208	0.257	0.00973891
hemc	lpxh	0.247	0.223	0.00956321
hemd	pola	0.268	0.215	0.00901624
hemd	rimm	0.24	0.274	0.0105413
hemd	rimp	0.349	0.193	0.0189114
hemd	seca	0.277	0.164	0.00936812
hemd	topa	0.535	0.146	0.0236102
hemd	ubia	0.243	0.138	0.00907283
hemd	yidc	0.227	0.118	0.00954814
heme	heml	0.232	0.207	0.00950238
heme	liga	0.237	0.069	0.00949948
heme	lptc	0.311	0.256	0.0146819
heme	pare	0.215	0.154	0.00974714
heme	pyrg	0.587	0.187	0.229749
heme	secy	0.228	0.159	0.00984406
heme	tmk	0.557	0.087	0.0290691
heme	ubia	0.253	0.216	0.00978654
hemg	kdsa	0.248	0.258	0.0105525
hemg	mreb	0.259034	0.265	0.0111267
hemg	murg	0.262	0.161	0.0119199
hemg	nadk	0.297	0.177	0.0104443
hemg	ribb	0.215	0.212	0.00992196
hemg	seca	0.21	0.152	0.171395
hemg	secy	0.24	0.189	0.0106727
hemh	mrdb	0.285	0.081	0.00852719
hemh	ribb	0.29	0.284	0.00878431
hemh	ribc	0.304	0.113	0.0112064
heml	nadk	0.231	0.159	0.00891767
heml	pare	0.233	0.191	0.00951055
heml	prfa	0.264	0.158	0.0102227
heml	ribc	0.229	0	0.00734779
heml	ubig	0.603	0.166	0.0105327
hola	mray	0.224	0.104	0.00997204
hola	mura	0.247	0.15	0.0093917
hola	murd	0.252	0.307	0.00913583
hola	pola	0.497	0.15	0.0114428
hola	pyrg	0.246	0.421	0.00934865
hola	ubig	0.331	0.084	0.0132484
holb	lgt	0.209	0.148	0.0093859
holb	mrda	0.239	0.084	0.00943385
holb	mrec	0.355	0.164	0.0185348
holb	pria	0.257	0.058	0.00944661
holb	ribc	0.254996	0.134	0.0114492
holb	sece	0.238	0.048	0.0107657
hsca	ispd	0.257	0.454	0.00950932
hscb	riba	0.22	0.112	0.0105343
hscb	tmk	0.244	0.081	0.0100876
hscb	topa	0.311	0.2	0.00884986
imp	mukb	0.264	0.018	0.00734779
imp	muri	0.337	0.207	0.00948342
imp	pyrg	0.271	0.494	0.00909494
infa	lole	0.296	0.032	0.00991538
infa	mray	0.411	0.098	0.0155108
infa	nrda	0.439	0.032	0.00957278
infa	psd	0.424	0.107	0.0121196
infa	ubia	0.42	0.069	0.0185307
iscs	mreb	0.273	0.299	0.00922937
iscs	suhb	0.316	0.148	0.00924304
iscs	topa	0.287	0.038	0.00869141
iscs	upps	0.274	0.062	0.00963844
ispb	lolc	0.298	0.124	0.0116014
ispb	lpxd	0.196	0.029	0.00932877
ispb	murf	0.248	0.123	0.009785
ispb	thya	0.202	0.044	0.00921518
ispd	ftsq	0.234	0.14	0.010615
ispd	pare	0.222	0.101	0.00942129
ispd	pgsa	0.373	0.02	0.0107725
ispd	plsc	0.211	0.048	0.00971535
ispd	rne	0.359	0.144	0.0107638
ispd	rnha	0.325	0.082	0.0137059
ispd	rpe	0.26	0.022	0.00734779
ispe	lola	0.292	0.292	0.0128731
ispe	pgk	0.295	0.283	0.00966757
ispe	purb	0.246	0.282	0.00951162
ispe	sdsa	0.231	0.098	0.010168
ispg	lole	0.228	0.413	0.00966391
ispg	pgsa	0.222	0.034	0.00953382
ispg	plsc	0.222	0.101	0.00903875
ispg	pria	0.25	0.099	0.00932568
ispg	rpoc	0.329	0.085	0.00929581
isph	dapf	0.379	0.104	0.0146717
isph	liga	0.279	0.145	0.0104949
isph	nade	0.287	0.123	0.00955741
isph	riba	0.268	0.254	0.00943987
isph	ribb	0.301	0.142	0.0109016
isph	rpoh	0.275	0.064	0.0153819
kdsa	dnac	0.25	0.022	0.00850767
kdsa	lptf	0.332	0.034	0.00960069
kdsa	mure	0.354	0.121	0.0117753
kdsa	muri	0.231	0.074	0.00973674
kdsa	rpoc	0.394	0.02	0.00734779
kdsa	rpoh	0.202	0.058	0.00971123
kdsb	dxr	0.222	0.1	0.00917798
kdsb	lnt	0.327	0.18	0.0102752
kdsb	lptg	0.215	0.035	0.00940818
kdsb	ubie	0.214	0.225	0.0100381
lepb	lpte	0.291	0.165	0.0107785
lepb	lptg	0.237	0.095	0.00923924
lepb	lpxd	0.233	0.061	0.0101639
lepb	murc	0.26	0.509	0.00952654
lepb	rho	0.287	0.147	0.00900744
lepb	rimp	0.247	0.244	0.00977528
lepb	secf	0.277	0.117	0.0139197
lexa	dapa	0.257	0.171	0.00958434
lexa	lolc	0.253	0.131	0.00882446
lexa	lptc	0.312	0.422	0.455236
lexa	lysc	0.264	0.181	0.00902437
lexa	prfa	0.229	0.18	0.00940855
lexa	sece	0.16	0.074	0.0103295
lexa	ubid	0.236	0.036	0.00909227
lexa	ubie	0.214	0.187	0.00973531
lgt	mrec	0.372	0.071	0.0273099
lgt	murg	0.279	0.086	0.0115272
lgt	ppa	0.268	0.061	0.00911595
lgt	psd	0.281	0.091	0.00917102
lgt	upps	0.307	0.038	0.00884141
liga	lpxa	0.255	0.399	0.0102931
liga	mrdb	0.232	0.035	0.0100775
liga	ribb	0.275	0.449	0.00926387
liga	ribc	0.225	0.326	0.0096413
liga	ubid	0.226	0.528	0.00918636
lnt	nadd	0.61	0.081	0.0241229
lnt	plsc	0.535	0.156	0.00951669
lola	nrdb	0.763	0.333	0.0805656
lola	pare	0.302	0.188	0.00992092
lola	pola	0.394	0.146	0.00988155
lola	rpoc	0.452	0.31	0.00980906
lola	seca	0.369	0.082	0.0104236
lola	yidc	0.233	0.055	0.00972483
lolb	lpte	0.274	0.113	0.0101093
lolb	lpxh	0.328	0.261	0.01261
lolb	rlpb	0.346423	0.166	0.010218
lolb	secd	0.325	0.201	0.00903084
lolb	suca	0.31	0.079	0.00964323
lolc	parc	0.267	0.032	0.00839148
lolc	ribc	0.277	0.169	0.00867555
lole	mukb	0.272	0	0.00734779
lole	plsc	0.263	0.04	0.013391
lole	rimm	0.328	0.071	0.00910958
lpta	mukb	0.259	0	0.00734779
lpta	ppa	0.213	0.08	0.00926418
lpta	waaa	0.267	0.078	0.00987543
lptc	mrda	0.62	0.304	0.10891
lptc	mreb	0.669	0.304	0.171646
lptc	psd	0.298	0.154	0.0132417
lptc	pssa	0.263	0.108	0.00875749
lptc	ubih	0.247	0.106	0.00869209
lptd	mrdb	0.294	0.16	0.00964856
lptd	prfa	0.402	0.176	0.0132469
lptd	rpia	0.351	0.028	0.00915516
lptd	thya	0.316	0.037	0.00873084
lpte	riba	0.228	0.038	0.00950334
lpte	thil	0.267	0.233	0.00999916
lpte	zipa	0.544	0.283	0.0103096
lptf	mukb	0.338	0.02	0.00734779
lptf	murj	0.296	0.246	0.0103972
lptf	tmk	0.212	0.062	0.0100205
lptg	murd	0.293	0.098	0.0100571
lptg	pnp	0.26	0.021	0.00953515
lptg	rpia	0.633	0.198	0.0271041
lptg	ubig	0.281	0.054	0.00890202
lpxa	mrec	0.22	0.067	0.00878144
lpxa	murc	0.235273	0.195	0.00959838
lpxa	ribb	0.213	0.139	0.0101046
lpxa	rpoa	0.237	0.254	0.010256
lpxa	rsmh	0.27	0.038	0.0139747
lpxb	ribf	0.23	0.266	0.00908379
lpxb	sdsa	0.303	0.063	0.00922376
lpxc	murc	0.306	0.324	0.00931035
lpxc	rpoc	0.341	0	0.00734779
lpxc	ubib	0.231	0.155	0.00924448
lpxd	prla	0.265	0.058	0.00918254
lpxd	zipa	0.232	0.107	0.00963561
lpxh	murd	0.265	0.229	0.0109378
lpxk	accc	0.276	0.311	0.00920336
lpxk	mrec	0.217	0.093	0.00953546
lpxk	pnp	0.287	0.092	0.00916358
lpxk	pssa	0.267	0.087	0.0108495
lpxk	rimm	0.262	0.131	0.00914498
lpxk	secf	0.272	0.092	0.00896486
lysc	murd	0.246	0.279	0.00991939
lysc	sdsa	0.275	0.019	0.00907576
lysc	sece	0.275	0.034	0.0141312
metk	mrdb	0.338	0.028	0.0172721
metk	nade	0.21	0	0.00734779
metk	nadk	0.355	0.043	0.0165056
mrda	nrda	0.384	0.041	0.00847712
mrda	prfa	0.268	0.207	0.00849282
mrda	purb	0.474	0.156	0.00933329
mrda	rpoc	0.386	0.032	0.00885861
mrda	tonb	0.354	0.238	0.0120794
mrdb	pare	0.221	0.197	0.00948897
mrdb	yfio	0.243	0.031	0.00895584
mreb	gmha	0.26	0.043	0.00940443
mreb	rpoh	0.596	0.203	0.0404871
mreb	secd	0.251	0.292	0.0102406
mreb	sece	0.379	0.039	0.0172033
mukf	parc	0.399	0	0.00734779
mukf	pyrf	0.274	0.101	0.00974098
mukf	seca	0.312	0.047	0.00930445
mukf	secf	0.236	0.068	0.0114379
mura	upps	0.311	0.148	0.00943698
mura	yidc	0.227	0.125	0.00888794
murb	fabb	0.243	0.433	0.00972855
murb	parc	0.29	0.254	0.00855403
murc	tmk	0.29	0.157	0.00924555
murc	ubid	0.216	0.434	0.00975766
murd	pgsa	0.269	0.095	0.00834215
murd	purb	0.229	0.472	0.00932281
mure	murg	0.268	0.04	0.009
mure	rpoh	0.303	0.049	0.0101062
mure	zipa	0.248	0.175	0.00972123
murf	parc	0.273086	0.133	0.00970105
murf	plsc	0.243	0.28	0.00944087
murg	nade	0.268	0.242	0.00855758
murg	plsc	0.281	0.229	0.0141974
murg	rimm	0.264	0.125	0.00944257
murg	waaa	0.248	0.312	0.00969109
muri	folb	0.322	0.092	0.0111297
muri	nadk	0.28	0.07	0.0112065
muri	yfio	0.255	0.176	0.0112121
murj	nadk	0.267	0.216	0.00934386
murj	rimp	0.314	0.189	0.00931377
nadk	secd	0.213	0.024	0.00876301
ndk	ubia	0.336453	0.083	0.00924066
nrda	prfa	0.343	0.052	0.00871419
nrda	rsmh	0.373	0.087	0.0083593
nrdb	pssa	0.27244	0.049	0.00975041
nusb	tmk	0.273	0.104	0.0101817
pare	prfa	0.219	0.112	0.0105067
pdxj	fola	0.331	0.174	0.00988971
pgk	pyrg	0.275	0.087	0.00923823
pgsa	rho	0.26	0.029	0.00930681
pgsa	yidc	0.349	0.058	0.00878914
plsb	tmk	0.279	0.038	0.00920522
plsc	pyrh	0.245	0.139	0.00883895
plsc	suca	0.29	0.026	0.00932695
pola	purb	0.236	0	0.00734779
pola	sece	0.38	0.027	0.010034
pola	suca	0.274	0.057	0.00945465
pola	upps	0.284	0.246	0.00962657
ppa	ispe	0.312	0.121	0.00906656
ppa	rimm	0.211	0.102	0.00959223
prfa	topa	0.281	0.417	0.0096724
prfa	waaa	0.202	0.223	0.00933106
psd	fabg	0.225	0.102	0.0164347
psd	rpoa	0.311	0.267	0.00949992
pssa	heme	0.314	0.112	0.0114423
pssa	rho	0.255	0.667	0.00916658
pssa	rpe	0.293	0.081	0.0100571
pssa	thya	0.253	0.214	0.00954044
purb	rpoc	0.313	0	0.00734779
purb	secy	0.24	0.019	0.00734779
pyrd	ribb	0.279	0.208	0.0091495
pyrf	lspa	0.458	0.048	0.0117146
pyrh	ubie	0.268	0.115	0.0104465
riba	accd	0.207	0.059	0.00922306
ribb	tmk	0.26	0.134	0.00905163
ribb	ubid	0.233	0.186	0.00878869
ribc	sucb	0.176	0.406	0.00977555
ribf	rpoc	0.665	0.109	0.0144631
ribf	secd	0.274	0.072	0.00862974
ribf	thya	0.224	0.115	0.00928082
rimm	sece	0.171	0.029	0.00870746
rlpb	ubia	0.421462	0.073	0.00879653
rne	ubid	0.243	0.03	0.00888798
rpe	sece	0.22	0.02	0.00931739
rpe	tmk	0.233	0.038	0.00987398
rpoa	folk	0.189	0.201	0.00910234
rpoa	gyrb	0.236	0.333	0.00954405
rpoh	ubid	0.368	0.079	0.00865642
rsmh	ubig	0.533	0.092	0.0136989
sdsa	sece	0.253	0.02	0.0118446
seca	tmk	0.272	0.263	0.0093861
seca	ubie	0.307	0.05	0.0096992
secf	adk	0.277	0.102	0.0123799
secf	thya	0.285	0.117	0.0151486
secf	waaa	0.252	0.147	0.0154455
secy	dnan	0.271	0.075	0.011346
secy	metk	0.288	0.078	0.0121336
thil	glmm	0.245	0.177	0.00996545
thil	zipa	0.228	0.106	0.0101757
tonb	fdx	0.759	0.175	0.0168534
topa	ubih	0.271	0.039	0.00901309
topa	zipa	0.304	0.159	0.00843441
tsf	rpoh	0.276	0.079	0.0098681
ubia	ndk	0.336	0.083	0.00924066
ubid	nrdb	0.265	0.117	0.00928889
waaa	hemb	0.246	0.259	0.00980487

## Sheet: Selected_Gram-positive_PPIs
Supplementary Data, File 1. List of selected Gram-positive essential PPIs modeled by AF2. Protein1 and Protein2 are the two proteins involved in the binary interaction. For each protein pair, the ipTM, pDockQ and pDockQ2 scores corresponding to the best model is provided.
Protein1	Protein2	ipTM	pDockQ	min pDockQ2			Function
acca	accb	0.649439	0.195	0.0887809			FA synthesis
acca	accc	0.303841	0.165	0.00921832			DNA replication
acca	accd	0.939826	0.704	0.794947			Protein transport
acca	eno	0.281368	0.093	0.010646			Cell division and elongation
acca	fabd	0.28065	0.018	0.00734779			Other
acca	fabf	0.260977	0	0.00734779
acca	fabh	0.229261	0.122	0.00996473
acca	fabz	0.259969	0	0.00734779
acca	infb	0.2713	0.073	0.0100622
accb	accc	0.566083	0.172	0.174343
accb	accd	0.231733	0.038	0.00872039
accb	acpp	0.227159	0.105	0.0113859
accb	bira	0.816413	0.488	0.0168324
accb	eno	0.277891	0.148	0.012679
accb	fabd	0.834232	0.488	0.01059
accb	fabf	0.377153	0.141	0.0105211
accb	fabh	0.311196	0	0.00734779
accb	fabz	0.36454	0.107	0.0109163
accc	accd	0.29629	0.331	0.00956048
accc	bira	0.313929	0.249	0.00986336
accc	eno	0.312332	0.129	0.0102016
accc	fabd	0.258365	0.188	0.00970336
accc	fabf	0.337548	0.168	0.00971222
accc	fabh	0.684626	0.211	0.00951839
accc	fabz	0.328055	0.079	0.00956537
accc	grol	0.290105	0.28	0.00981709
accc	guab	0.262063	0.214	0.00899011
accc	nade	0.268382	0.508	0.0101679
accd	acpp	0.456055	0.077	0.0144066
accd	acps	0.278931	0.026	0.00734779
accd	asd	0.268879	0.186	0.00933235
accd	eno	0.296782	0.164	0.0104655
accd	fabd	0.260741	0.053	0.00998609
accd	fabf	0.241464	0.096	0.00993028
accd	fabg	0.199603	0.041	0.0118282
accd	fabh	0.251398	0.052	0.00940858
accd	fabz	0.258233	0.018	0.0101214
acka	ptsi	0.225047	0.401	0.00895152
acpp	acps	0.82907	0.265	0.488895
acpp	fabd	0.872052	0.27	0.647643
acpp	fabf	0.810685	0.079	0.393431
acpp	fabg	0.782145	0.067	0.37217
acpp	fabh	0.477388	0.072	0.0240166
acpp	fabz	0.764058	0.074	0.567352
acpp	prfb	0.579192	0.119	0.0451498
acps	coae	0.350377	0.27	0.0142969
acps	fabd	0.275857	0	0.00734779
acps	fabf	0.249598	0.027	0.0098423
acps	fabh	0.294597	0.151	0.0096289
acps	fabz	0.209654	0	0.00734779
acps	murc	0.262054	0.2	0.00969832
acps	plsx	0.288377	0	0.00734779
acps	plsy	0.215016	0.065	0.00954957
adk	atpg	0.371603	0.075	0.0113331
adk	dnak	0.345845	0.435	0.00910467
adk	fusa	0.261207	0.108	0.00909527
adk	gyrb	0.285621	0.179	0.00947013
adk	nrde	0.312926	0.038	0.0090764
adk	nrdf	0.480134	0.027	0.0116543
adk	pyk	0.344368	0.168	0.00956961
adk	rpoa	0.249697	0.086	0.010834
adk	secy	0.283231	0.098	0.00957673
adk	tmk	0.267692	0.143	0.010133
asd	dapf	0.20813	0.467	0.00932474
asd	dapg	0.208382	0.024	0.00831182
asd	daph	0.206205	0.02	0.00944888
asd	rpob	0.285006	0.105	0.00972201
asd	rpoc	0.303719	0	0.00734779
atpd	atpe	0.285363	0	0.00734779
atpd	atpf	0.269764	0	0.00734779
atpd	dnan	0.370444	0.078	0.0110503
atpd	fabd	0.379104	0.157	0.0121439
atpd	fusa	0.217296	0.037	0.00891685
atpd	glms	0.575905	0.146	0.0330088
atpd	guaa	0.218016	0.062	0.00981249
atpd	ppac	0.248469	0.057	0.0101443
atpd	rpob	0.273126	0.142	0.00977247
atpd	rpoc	0.349882	0	0.00734779
atpd	tuf	0.245729	0.131	0.00934116
atpe	atpf	0.246509	0.047	0.00939745
atpe	dnak	0.478586	0.051	0.0181041
atpf	ppac	0.186366	0	0.00734779
atpf	rpoa	0.178383	0	0.00734779
atpg	grol	0.228128	0.165	0.00923713
bira	fabd	0.218764	0.317	0.00936451
bira	fabf	0.213392	0.272	0.00922132
bira	nade	0.240987	0.104	0.0107244
cdsa	pgsa	0.247483	0.163	0.00918897
cdsa	plsy	0.283412	0.34	0.0107849
cdsa	pyrh	0.213354	0	0.00734779
cdsa	upps	0.30453	0.077	0.0124352
clpx	ftsz	0.232107	0.135	0.00921626
clpx	grol	0.279797	0.074	0.0100708
clpx	grpe	0.261346	0.074	0.00904754
clpx	metk	0.326054	0.07	0.0114898
clpx	reca	0.298646	0.126	0.00903321
cmk	nrde	0.290529	0.053	0.00878404
cmk	nrdf	0.239935	0.116	0.00951427
cmk	pyrh	0.233799	0.147	0.00902077
coabc	coad	0.26784	0.039	0.0089088
coabc	coae	0.249611	0.217	0.00910642
coabc	gmk	0.230551	0.037	0.00960609
coad	coae	0.248194	0.126	0.0099818
coae	fabg	0.46504	0.131	0.0108872
coae	glms	0.279513	0	0.00734779
coae	trxa	0.253473	0.123	0.0110458
daca	dnax	-	-	-
daca	glmm	0.833878	0.15	0.793428
dapf	mure	0.420579	0.281	0.00950565
daph	fabd	0.232553	0.156	0.00977057
ddl	divib	0.264811	0.218	0.0105855
ddl	ftsz	0.258132	0.245	0.0106777
ddl	murb	0.267172	0.201	0.00923144
ddl	murc	0.228869	0.403	0.00875443
ddl	murd	0.264577	0.264	0.0099679
ddl	mure	0.238548	0.46	0.00961352
ddl	murf	0.759116	0.243	0.2021
ddl	murg	0.572709	0.178	0.00937206
divib	ezra	0.34742	0.329	0.082705
divib	ftsa	0.584454	0.271	0.0332222
divib	ftsl	0.335928	0.08	0.031636
divib	ftsz	0.316854	0.242	0.00909624
divib	gpsb	0.25969	0.026	0.0147547
divib	murb	0.233983	0.24	0.00938408
divib	murd	0.294539	0.378	0.0100922
divib	murg	0.236685	0.183	0.0100819
divib	seca	0.292448	0.131	0.00969174
divib	sece	0.506291	0.135	0.0457568
divib	secy	0.365909	0.076	0.010594
dnaa	dnab	0.200882	0.026	0.00984267
dnaa	dnac	0.235799	0.229	0.0111925
dnaa	dnag	0.218302	0.104	0.00935587
dnaa	dnai	0.208923	0.148	0.0086247
dnaa	dnan	0.255314	0.165	0.00927409
dnaa	dnax	0.22308	0.108	0.0100233
dnaa	gyra	0.25312	0.237	0.0106325
dnaa	gyrb	0.248141	0.213	0.00910473
dnaa	pola	0.254544	0.112	0.00890636
dnaa	polc	0.530414	0.144	0.00949453
dnaa	reca	0.242185	0.113	0.00953918
dnaa	recf	0.263211	0.28	0.00967824
dnaa	rpob	0.236237	0.028	0.00911489
dnab	dnac	0.492662	0.615	0.0681154
dnab	dnae	0.280207	0.23	0.00938282
dnab	dnag	0.36648	0.293	0.0184588
dnab	dnai	0.750406	0.566	0.424268
dnab	dnax	0.467392	0.194	0.0596644
dnab	pcra	0.249438	0.109	0.00903545
dnab	pola	0.343758	0.063	0.0139627
dnac	dnad	0.185481	0.019	0.00734779
dnac	dnae	0.279948	0.079	0.00877796
dnac	dnag	0.404015	0.447	0.140316
dnac	dnai	0.593539	0.336	0.236279
dnac	dnan	0.212194	0.163	0.00906392
dnac	dnax	0.533678	0.189	0.0238882
dnac	fusa	0.220499	0.264	0.00901511
dnac	pcra	0.235428	0.093	0.0093928
dnac	polc	0.554899	0.523	0.0110674
dnac	pria	0.278677	0.136	0.0086627
dnad	dnai	0.422059	0.218	0.011709
dnae	dnag	0.644354	0.41	0.105457
dnae	dnan	0.58923	0.097	0.011211
dnae	dnax	0.459794	0.174	0.00923424
dnae	folc	0.343044	0.199	0.00908265
dnae	guaa	0.375719	0.019	0.00884448
dnae	gyra	0.624445	0.359	0.0121699
dnae	infb	0.268772	0.028	0.00946569
dnae	isph	0.336859	0.074	0.0118654
dnae	liga	0.348204	0.067	0.00905211
dnae	parc	0.2727	0.21	0.0103516
dnae	pola	0.293	0.098	0.009
dnae	polc	0.296	0.617	0.009
dnae	pyk	0.278866	0.032	0.00964576
dnae	rpob	0.316871	0.033	0.00942793
dnae	rpoc	0.305	0.258	0.009
dnae	ssb	0.323886	0.151	0.00851043
dnae	tpia	0.310352	0.334	0.010158
dnae	uvrb	0.285032	0.043	0.00938306
dnag	dnan	0.211502	0.142	0.00960171
dnag	dnax	0.244988	0.217	0.00909407
dnag	gpsb	0.248376	0.022	0.00853662
dnag	guab	0.461701	0.115	0.0104453
dnag	gyra	0.235353	0.275	0.00821436
dnag	gyrb	0.222918	0.343	0.00920995
dnag	liga	0.206259	0.336	0.00900214
dnag	nusg	0.29141	0.089	0.00927279
dnag	pare	0.232747	0.229	0.00887495
dnag	pola	0.269372	0.209	0.00910177
dnag	polc	0.653	0.228	0.039
dnag	rpob	0.223423	0.042	0.00786665
dnag	rpoc	0.328794	0.124	0.00938801
dnag	rpod	0.208404	0.09	0.00938515
dnag	ssb	0.236849	0.06	0.00855188
dnag	tsf	0.241763	0.033	0.00891937
dnai	dnan	0.241309	0.381	0.00970328
dnai	pola	0.277566	0.17	0.0095789
dnai	polc	0.309083	0.069	0.00932143
dnai	recf	0.229972	0.33	0.00924381
dnak	eno	0.232503	0.641	0.00999657
dnak	ffh	0.455796	0.15	0.0109701
dnak	ftsh	0.402093	0.196	0.00943442
dnak	ftsl	0.471537	0.123	0.0823826
dnak	ftsz	0.297925	0.396	0.011683
dnak	fusa	0.513291	0.151	0.0299935
dnak	grol	0.4311	0.201	0.0116468
dnak	grpe	0.68887	0.25	0.0798085
dnak	guaa	0.223787	0.039	0.00915533
dnak	gyra	0.294818	0.375	0.0111152
dnak	gyrb	0.265188	0.099	0.00929757
dnak	infb	-	-	-
dnak	parc	0.334676	0.1	0.0105679
dnak	pare	0.215633	0.684	0.00941766
dnak	pgk	0.27765	0.279	0.00934573
dnak	rpoa	0.231415	0.126	0.00966814
dnak	rpob	0.261658	0.123	0.00962318
dnak	rpoc	0.295642	0.211	0.0094989
dnak	rpod	0.257964	0.142	0.00919527
dnak	secy	0.640077	0.245	0.089308
dnak	tkt	0.234804	0.602	0.00965252
dnak	topa	0.25213	0.085	0.00929572
dnak	tpia	0.249084	0.385	0.00908144
dnak	tuf	0.268437	0.17	0.00914946
dnan	dnax	0.712669	0.304	0.215367
dnan	gyra	0.255315	0.032	0.00935243
dnan	gyrb	0.302508	0.135	0.00945271
dnan	murf	0.221546	0.259	0.0091573
dnan	nrde	0.31087	0.032	0.00973864
dnan	pcra	0.224403	0.044	0.00914555
dnan	pola	0.247557	0.05	0.00897023
dnan	polc	0.784265	0.283	0.307291
dnan	pyk	0.228206	0.185	0.00927321
dnan	reca	0.473898	0.286	0.0107892
dnan	recf	0.293285	0.107	0.00936258
dnan	rpoc	0.348873	0	0.00734779
dnan	thya	0.219535	0.218	0.00973279
dnax	infb	0.33095	0.099	0.00855371
dnax	pola	0.25	0.071	0.009
dnax	polc	0.341659	0.104	0.041077
dnax	pyk	0.220815	0	0.00734779
dnax	rpob	0.309	0.281	0.009
dnax	rpoc	0.348	0.05	0.009
dnax	ssb	0.237022	0.022	0.00734779
efp	fusa	0.326541	0.097	0.0103571
eno	fba	0.263254	0.084	0.0100306
eno	fusa	0.236726	0.384	0.00967476
eno	gapa	-	-	-
eno	gpmi	0.252051	0.07	0.00991451
eno	guab	0.299462	0.086	0.011117
eno	pfka	0.278508	0	0.00734779
eno	pgi	0.276293	0	0.00734779
eno	pgk	0.321551	0.15	0.00984868
eno	pyk	0.347678	0.023	0.0103065
eno	rny	0.239229	0.072	0.00994252
eno	tkt	0.250323	0.267	0.00984286
eno	tpia	0.268638	0.075	0.00961629
eno	zwf	0.313066	0.086	0.00945356
ezra	ftsa	0.744	0.472	0.478
ezra	ftsl	0.338	0.057	0.015
ezra	ftsz	0.61	0.304	0.255
ezra	gpsb	0.291	0.129	0.01
ezra	murg	0.512	0.132	0.016
ezra	smc	-	-	-
fabd	fabf	0.250006	0.028	0.00961378
fabd	fabg	0.242992	0.267	0.0101567
fabd	fabh	0.265437	0	0.00734779
fabd	fabk	0.234171	0.283	0.00937461
fabd	fabz	0.285448	0	0.00734779
fabd	plsx	0.241552	0.022	0.00734779
fabf	fabg	0.245818	0	0.00734779
fabf	fabh	0.225191	0.131	0.00939264
fabf	fabk	0.207719	0.023	0.00959025
fabf	fabz	0.253224	0	0.00734779
fabf	plsx	0.248974	0	0.00734779
fabf	plsy	0.275876	0.129	0.00945939
fabg	fabh	0.228525	0	0.00734779
fabg	ftsh	0.211597	0.019	0.0096651
fabg	infb	0.202	0.039	0.01
fabg	plsx	0.222889	0	0.00734779
fabg	tpia	0.183	0	0.007
fabh	fabk	0.238267	0.093	0.009317
fabh	fabz	0.279406	0	0.00734779
fabh	plsx	0.248438	0.022	0.00964072
fabk	fabz	0.254011	0.05	0.00958139
fabz	ffh	0.233	0.035	0.009
fabz	plsx	0.263466	0	0.00734779
fba	ftsz	0.293	0.182	0.01
fba	grol	0.306	0.363	0.01
fba	guab	0.297632	0.126	0.0101945
fba	pfka	0.216179	0	0.00734779
fba	pgi	0.234807	0	0.00734779
fba	pgk	0.244027	0.047	0.00958879
fba	rpob	0.340712	0	0.00734779
fba	rpoc	0.277	0.095	0.033
ffh	ftsy	0.730483	0.54	0.415594
ffh	guab	0.252457	0.055	0.00899573
ffh	gyra	0.313715	0.068	0.00921898
ffh	infb	0.281474	0.124	0.00887308
ffh	metk	0.331669	0.081	0.0125341
ffh	parc	0.2424	0.028	0.0101847
ffh	rpob	0.234	0.129	0.021
ffh	rpod	0.219	0.047	0.0104808
ffh	seca	0.305427	0.128	0.00850365
ffh	sece	0.42794	0.081	0.0111992
ffh	secy	0.223081	0.052	0.00879502
ffh	smc	0.265274	0.019	0.00734779
fni	ftsy	0.222228	0.528	0.00889595
fni	mvad	0.223	0.038	0.01
folb	folk	0.286109	0.064	0.00926332
folb	folp	0.36171	0.103	0.0158949
folc	folk	0.350964	0.131	0.0104774
folc	folp	0.273391	0.297	0.00941991
fole	rpob	0.312142	0	0.00734779
fole	rpoc	0.323809	0	0.00734779
fole	rpoz	0.218807	0.06	0.0104164
folk	folp	0.288482	0.116	0.00928617
folp	glmm	0.277107	0.304	0.0102731
folp	guab	0.271476	0.047	0.0115274
ftsa	ftsl	0.302912	0.094	0.023518
ftsa	ftsz	0.586698	0.273	0.0117929
ftsa	fusa	0.586755	0.161	0.139116
ftsa	gpsb	0.288383	0.045	0.0118142
ftsa	mrec	0.244537	0.082	0.00933636
ftsa	murc	0.242091	0.307	0.00965315
ftsa	murd	0.223944	0.143	0.00956984
ftsa	murg	0.250677	0.211	0.00950491
ftsa	nusg	0.305776	0.159	0.0114993
ftsa	tkt	0.274568	0.232	0.00979842
ftsa	tuf	0.268792	0.133	0.00949626
ftsh	grol	0.502823	0.156	0.0328271
ftsh	ssb	0.232145	0.05	0.00874167
ftsl	ftsz	0.294393	0.091	0.00978583
ftsy	pola	0.28277	0.129	0.00877904
ftsy	rpob	0.346218	0.063	0.00943021
ftsy	rpod	0.228012	0.052	0.00941057
ftsy	seca	0.281634	0.107	0.00887297
ftsy	sece	0.289984	0	0.00734779
ftsy	secy	0.272353	0.033	0.00887452
ftsy	smc	0.579917	0.215	0.00899804
ftsy	tsf	0.448045	0.076	0.0183054
ftsz	fusa	0.239989	0.049	0.00845338
ftsz	gpsb	0.282678	0.137	0.0105428
ftsz	gyra	0.246759	0.046	0.00917896
ftsz	gyrb	0.221571	0.066	0.00882084
ftsz	mrec	0.242563	0.126	0.0090518
ftsz	murc	0.370142	0.453	0.011488
ftsz	murd	0.227329	0.306	0.00949836
ftsz	murf	0.257971	0.51	0.00972692
ftsz	murg	0.254275	0.147	0.0088953
ftsz	parc	0.229388	0.066	0.00904752
ftsz	reca	0.225692	0.182	0.00932696
ftsz	seca	0.328387	0.064	0.0085342
ftsz	secy	0.323198	0.116	0.0110605
ftsz	sepf	0.230019	0.169	0.0109189
ftsz	tuf	0.211764	0.168	0.00968807
ftsz	uvra	-	-	-
fusa	gmk	0.261137	0.222	0.00922627
fusa	grol	0.245984	0.146	0.0102789
fusa	guaa	0.233344	0.021	0.00918874
fusa	infc	0.314117	0.101	0.0115516
fusa	map	0.24638	0.092	0.0088556
fusa	nrde	0.281556	0.147	0.00865261
fusa	nusg	0.475	0.085	0.014
fusa	pgk	0.261135	0.064	0.00941969
fusa	prfa	0.474938	0.235	0.00898374
fusa	rpoa	0.299	0.173	0.01
fusa	rpob	0.243	0.026	0.01
fusa	rpoc	0.324903	0.018	0.0094393
fusa	secy	0.37995	0.11	0.00921035
fusa	smpb	0.291	0.093	0.009
fusa	tsf	0.265869	0.168	0.00949221
fusa	tuf	0.218004	0.202	0.00882064
gapa	gmk	0.24	0.019	0.007
gapa	rpoc	0.295	0.039	0.007
glmm	glms	0.368843	0	0.00734779
glmm	glmu	0.381877	0.018	0.00734779
glmm	murb	0.267191	0.346	0.0118324
glmm	murc	0.309998	0.132	0.010532
glmm	murf	0.258	0.204	0.01
glmm	nusg	0.315	0.152	0.014
glmm	tkt	0.272	0.296	0.01
glmm	tpia	0.279	0.036	0.01
glms	glmu	0.304447	0.018	0.00734779
glms	grol	0.233	0.083	0.001
glms	guaa	0.239954	0.019	0.00734779
glms	murb	0.255004	0.339	0.00893944
glms	pgi	0.210734	0	0.00734779
glms	reca	0.251711	0.142	0.00946262
glmu	murc	0.235952	0.283	0.0092417
glmu	murd	0.261758	0.052	0.00941465
glmu	mure	0.240587	0.261	0.00951206
glmu	murf	0.223747	0.392	0.00868001
gmk	guaa	0.261468	0.129	0.0095583
gmk	murd	0.237565	0.162	0.00876663
gmk	nrde	0.315193	0.046	0.00873641
gmk	nrdf	0.235298	0.095	0.00913777
gmk	pria	0.257592	0.04	0.009
gmk	pyk	0.268451	0.027	0.0102864
gmk	pyrh	0.189188	0	0.00734779
gmk	rpoz	0.241596	0.098	0.0101352
gmk	tpia	0.216071	0.138	0.00902199
gpmi	guaa	0.225177	0.374	0.00900718
gpmi	pgi	0.214	0.094	0.024
gpmi	pgk	0.232	0.433	0.01
gpmi	rpob	0.252	0.043	0.009
gpmi	rpoc	0.291	0.019	0.009
gpsa	guab	0.283704	0.037	0.011568
gpsa	plsx	0.260607	0	0.00734779
gpsa	plsy	0.221295	0.321	0.00953334
gpsa	tarj	0.20333	0.104	0.00954686
gpsa	tpia	0.208142	0.043	0.00948386
gpsb	murc	0.304312	0.058	0.0105152
gpsb	pria	0.447458	0.113	0.00965214
gpsb	ptsi	0.290178	0.046	0.0086373
gpsb	recu	0.300782	0.066	0.0170365
grea	rpoa	0.225063	0.061	0.00896706
grea	rpob	0.225567	0.392	0.00925991
grea	rpoc	0.848615	0.488	0.244264
grea	rpoz	0.409099	0.145	0.00993877
grol	grpe	0.221893	0.033	0.00939392
grol	guaa	0.223529	0.036	0.0093942
grol	guab	0.238461	0.177	0.00907617
grol	gyrb	0.234475	0.2	0.00914067
grol	metk	0.280815	0.022	0.0100883
grol	pfka	0.240766	0.055	0.0098779
grol	pyk	0.246906	0.05	0.00920221
grol	reca	0.229122	0.098	0.00963888
grol	rpob	0.239646	0.034	0.0100288
grol	rpoc	0.31	0.033	0.009
grol	rpod	0.220822	0.022	0.00734779
grol	tuf	0.27401	0.057	0.0104844
grol	zwf	0.354251	0.095	0.00951708
guaa	guab	0.259491	0.068	0.0102743
guaa	infb	0.305058	0.263	0.00915213
guaa	nade	0.220319	0.055	0.00988615
guaa	pyrf	0.22252	0	0.00734779
guaa	pyrh	0.256051	0	0.00734779
guaa	rpob	0.234049	0.045	0.00954605
guaa	rpoc	0.332455	0	0.00734779
guaa	tkt	0.242253	0	0.00734779
guaa	tuf	0.233319	0.047	0.00938231
guab	pola	0.252455	0.155	0.00923086
guab	pyrf	0.275928	0.059	0.00999199
guab	rpoa	0.257505	0.15	0.0106933
guab	rpoc	0.317	0.091	0.009
guab	rpod	0.243	0.126	0.01
guab	tmk	0.340551	0.065	0.00969999
gyra	gyrb	0.599728	0.583	0.377108
gyra	liga	0.231742	0.483	0.00926533
gyra	metk	0.349	0.087	0.01
gyra	murf	0.236376	0.131	0.00927883
gyra	pare	0.594592	0.583	0.498134
gyra	reca	0.280612	0.036	0.00975552
gyra	recf	0.429401	0.256	0.0228325
gyra	rpob	-	-	-
gyra	seca	0.463	0.183	0.012
gyra	ssb	0.276665	0.035	0.00851126
gyra	walr	-	-	-
gyrb	infb	0.213368	0.136	0.00902221
gyrb	liga	0.209534	0.159	0.00900753
gyrb	metk	0.307091	0.067	0.0151225
gyrb	parc	0.583373	0.506	0.252839
gyrb	ppac	0.22677	0.078	0.0088726
gyrb	reca	0.223883	0.562	0.00957234
gyrb	recf	0.223587	0.27	0.00913602
gyrb	rpoa	0.231891	0.319	0.00941999
gyrb	rpob	0.229483	0.087	0.00911888
gyrb	rpoc	0.302286	0	0.00734779
gyrb	rpod	0.353688	0.141	0.00898512
gyrb	seca	0.393028	0.101	0.0111817
gyrb	smc	0.373874	0.157	0.00900787
hprk	ptsi	0.225613	0.235	0.00910436
infb	infc	0.203188	0.021	0.00868277
infb	nusa	0.249812	0.029	0.00975194
infb	pola	0.246555	0.047	0.00893026
infb	prfa	0.218166	0.044	0.00854955
infb	pyrh	0.375697	0.051	0.00932134
infb	rpob	0.282932	0.018	0.00734779
infb	rpoc	0.289	0.025	0.009
infb	secy	0.242599	0.038	0.00922066
infb	tsf	0.236047	0.021	0.00795257
infc	prfb	0.232193	0.038	0.0111249
infc	rpoc	0.332	0	0.007
infc	rpod	0.206399	0.02	0.00734779
infc	secy	0.449011	0.045	0.0215429
infc	tsf	0.197454	0.059	0.013076
ispd	ispe	0.281856	0.196	0.0105626
ispd	ispf	0.23612	0.056	0.00827654
ispd	ispg	0.223046	0.103	0.0090415
ispd	isph	0.279161	0.141	0.0113601
ispd	murc	0.244128	0.242	0.00874863
ispe	ispf	0.240681	0.071	0.00967338
ispe	ispg	0.236363	0.198	0.00966583
ispe	isph	0.323837	0.141	0.012128
ispf	ispg	0.205214	0	0.00734779
ispf	isph	0.283165	0.166	0.011233
ispf	metk	0.332285	0.032	0.00989549
ispf	murc	0.352848	0.048	0.0151652
ispg	isph	0.231543	0.093	0.00984436
liga	pcra	0.230534	0.057	0.00925216
mena	menb	0.390945	0.063	0.0145316
metk	parc	0.294678	0	0.00734779
metk	pare	0.274746	0.057	0.00942346
metk	pyrg	0.279665	0.037	0.00962518
metk	reca	0.281704	0.032	0.0149064
metk	tpia	0.216031	0.02	0.00734779
metk	tuf	0.297373	0.033	0.0129948
mray	mrec	0.330655	0.145	0.0101204
mray	murb	0.258368	0.144	0.00939086
mray	murc	0.396997	0.2	0.00938367
mray	murd	0.252593	0.105	0.010446
mray	mure	0.28755	0.114	0.00955529
mray	murf	0.346709	0.096	0.010871
mray	murg	0.306298	0.092	0.0125196
murb	murc	0.231842	0.618	0.00955299
murb	murd	0.317853	0.286	0.00927921
murb	mure	0.259873	0.435	0.00977921
murb	murf	0.248327	0.35	0.00982677
murb	murg	0.260829	0.554	0.00903047
murc	murd	0.218941	0.537	0.00941411
murc	mure	0.22832	0.226	0.00938051
murc	murf	0.243666	0.509	0.00942784
murc	murg	0.231534	0.314	0.00938957
murd	mure	0.225506	0.277	0.00919276
murd	murf	0.246004	0.306	0.00936471
murd	murg	0.235702	0.267	0.0090565
murd	muri	0.904452	0.515	0.873655
mure	murf	0.285181	0.054	0.00913272
mure	murg	0.255726	0.311	0.00933087
mure	upps	0.273276	0.09	0.00905639
murf	murg	0.289754	0.163	0.0101412
murf	parc	0.228475	0.023	0.00888563
murf	uvrb	0.245725	0.352	0.00904267
muri	nusg	0.487855	0.145	0.0101881
nadd	nade	0.205918	0.164	0.00954557
nrde	nrdf	0.856059	0.546	0.0809717
nrde	nrdi	0.731225	0.11	0.0236845
nrde	pola	0.260352	0.102	0.0090163
nrde	pyk	0.282275	0.053	0.00943599
nrde	tmk	0.30247	0.052	0.00928471
nrdf	nrdi	0.874513	0.283	0.765113
nrdf	pyk	0.280178	0.165	0.0104541
nrdf	tmk	0.244426	0.02	0.00887252
nusa	nusb	0.19588	0.334	0.0096249
nusa	nusg	0.211573	0.076	0.0101275
nusa	rpoa	0.177619	0.019	0.00734779
nusa	rpob	0.193194	0.05	0.00976359
nusa	rpoc	0.291945	0.026	0.00922886
nusa	rpod	0.223338	0.102	0.0116179
nusb	nusg	0.212273	0.064	0.0103813
nusb	rpoa	0.220998	0.075	0.00889983
nusb	rpob	0.346882	0.021	0.0119947
nusb	rpoc	0.30794	0	0.00734779
nusg	rpoa	0.242834	0.077	0.0105998
nusg	rpob	0.232059	0.043	0.0100613
nusg	rpoc	0.687862	0.199	0.415765
nusg	rpod	0.198974	0.102	0.00888381
nusg	sece	0.158178	0.033	0.0108107
nusg	tuf	0.656811	0.512	0.0110339
parc	pare	0.612682	0.613	0.398543
parc	reca	0.236	0.023	0.009
parc	seca	0.303815	0.297	0.00976469
parc	ssb	0.282468	0.041	0.0119251
parc	uvra	-	-	-
parc	walr	0.300562	0.086	0.00981414
pare	pola	0.289706	0.049	0.00916248
pare	ppac	0.226784	0.217	0.00935948
pare	reca	0.220196	0.505	0.00887649
pare	rpob	0.226761	0.123	0.00961549
pare	rpod	0.223245	0.101	0.0086228
pare	smc	0.317637	0.04	0.0102742
pcra	pola	0.669417	0.262	0.0924057
pcra	polc	0.545547	0.135	0.0121004
pcra	reca	0.247993	0.021	0.00923315
pcra	recf	0.715887	0.145	0.0364868
pcra	rpoa	0.375622	0.15	0.00918823
pcra	rpob	0.27155	0.047	0.00945487
pcra	rpoc	0.2945	0.069	0.00939021
pcra	smc	0.339091	0.056	0.00900802
pcra	topa	0.256052	0.17	0.00897736
pcra	uvra	-	-	-
pcra	uvrb	0.382212	0.268	0.0101909
pfka	pgi	0.254366	0	0.00734779
pfka	pgk	0.209123	0.023	0.00734779
pfka	pyk	0.221572	0	0.00734779
pfka	reca	0.21596	0	0.00734779
pfka	rny	0.19721	0	0.00734779
pfka	tkt	0.258542	0	0.00734779
pfka	tpia	0.211564	0	0.00734779
pgi	pgk	0.220542	0.123	0.00962079
pgi	pyk	0.253683	0.019	0.00734779
pgi	tarj	0.269497	0.018	0.00734779
pgi	tkt	0.249734	0	0.00734779
pgi	tpia	0.262731	0	0.00734779
pgi	zwf	0.218631	0.023	0.00931694
pgk	pola	0.325889	0.109	0.0113696
pgk	pyk	0.21432	0.039	0.00902334
pgk	rpob	0.211259	0.018	0.00734779
pgk	tkt	0.248031	0.665	0.00959397
pgk	tpia	0.276629	0.187	0.00924065
pgk	tuf	0.263172	0.378	0.0104754
plsx	plsy	0.260624	0.297	0.0100358
pola	polc	-	-	-
pola	prfb	0.322116	0.086	0.00929168
pola	pria	0.288288	0.117	0.00899524
pola	pyk	0.237993	0.114	0.0093492
pola	reca	0.266827	0.022	0.00909136
pola	recf	0.247018	0.369	0.00943191
pola	rpoa	0.24624	0.288	0.00924831
pola	rpob	0.271668	0.019	0.00734779
pola	rpoc	0.294002	0.021	0.00915978
pola	rpod	0.256381	0.054	0.00929164
pola	ruva	0.296281	0.023	0.00926729
pola	ruvb	-	-	-
pola	smc	-	-	-
pola	thya	0.255711	0.131	0.00869086
pola	tmk	0.278358	0.045	0.00955917
pola	topa	0.260242	0.05	0.0086602
pola	tpia	0.28559	0.156	0.010056
pola	tsf	0.758	0.185	0.01
pola	uvra	-	-	-
pola	uvrb	0.461709	0.224	0.0254647
pola	uvrc	0.275682	0.256	0.00904441
polc	pyk	0.307081	0.05	0.00930283
prfa	prfb	0.429379	0.131	0.0116078
prfb	seca	0.401772	0.082	0.0146201
pria	ssb	0.673443	0.278	0.0254525
pyk	rpoa	0.235212	0.029	0.00957818
pyk	rpob	0.237668	0	0.00734779
pyk	rpoc	0.286801	0	0.00734779
pyk	tkt	0.238492	0.192	0.00973495
pyk	tpia	0.224267	0.019	0.00977065
pyk	zwf	0.228898	0.034	0.00860273
pyrc	pyrf	0.286759	0.125	0.00975976
pyrf	pyrh	0.279991	0.034	0.0131398
pyrf	topa	0.318714	0.099	0.00920349
pyrg	pyrh	0.272824	0.018	0.00734779
pyrg	rpoa	0.25717	0.068	0.00905041
pyrg	rpob	0.245591	0.073	0.00956067
pyrg	rpoc	0.282498	0	0.007
pyrh	tsf	0.282695	0.206	0.010421
pyrh	upps	0.205141	0	0.00734779
reca	rpob	0.228152	0.04	0.00973062
reca	rpoc	0.318158	0	0.00734779
reca	rpod	0.454022	0.087	0.0104166
reca	ruva	0.271917	0.037	0.0118844
reca	ruvb	0.200978	0.093	0.00965098
reca	smc	0.217808	0	0.00734779
reca	tmk	0.240029	0.077	0.00975587
reca	topa	0.261658	0.048	0.00935736
rpoa	rpob	0.228596	0	0.00734779
rpoa	rpoc	0.797286	0.45	0.139358
rpoa	rpod	0.187374	0.018	0.00734779
rpoa	secy	0.245038	0.108	0.00984631
rpoa	topa	0.367783	0.131	0.0140212
rpoa	tsf	0.215308	0.051	0.00924958
rpob	rpoc	0.900177	0.536	0.622937
rpob	rpod	0.226994	0.05	0.0112339
rpob	rpoz	0.35619	0.022	0.0098768
rpob	seca	0.297	0	0.007
rpob	secy	0.482457	0.068	0.00945694
rpob	smpb	0.273593	0.05	0.0119085
rpob	trxa	0.215808	0.023	0.00970452
rpob	tsf	0.222392	0.067	0.00979431
rpob	tuf	0.210145	0.071	0.0100722
rpob	uvra	-	-	-
rpob	uvrb	0.346653	0.024	0.0092511
rpoc	rpod	0.777	0.652	0.33
rpoc	rpoz	0.859311	0.642	0.598
rpoc	secy	0.47948	0	0.00734779
rpoc	thya	0.290906	0.106	0.00900972
rpoc	topa	0.319772	0.085	0.00860653
rpoc	trxa	0.299375	0.019	0.00857956
rpoc	tuf	0.540602	0.167	0.0135312
rpoc	uvra	-	-	-
rpoc	uvrb	-	-	-
rpod	secy	-	-	-
ruva	ruvb	-	-	-
seca	sece	0.33377	0	0.00734779
seca	secy	0.727747	0.526	0.165114
sece	secy	0.824384	0.572	0.492987
secy	tsf	0.479654	0.273	0.00952029
smc	topa	-	-	-
ssb	topa	0.295747	0.108	0.0102179
sufb	sufc	0.901846	0.532	0.76113
sufb	sufd	0.906172	0.658	0.817894
sufb	sufs	0.268267	0.083	0.00869417
sufc	sufd	0.904314	0.54	0.732611
sufc	sufs	0.297625	0.197	0.0106683
sufd	sufs	0.273353	0.266	0.0093996
tagg	tagh	-	-	-
tarj	tpia	0.343419	0.074	0.00967707
thya	tmk	0.233739	0.178	0.00914253
tkt	tpia	0.290042	0.022	0.00937611
tkt	zwf	0.240435	0.601	0.00980289
tpia	zwf	0.282659	0.039	0.00980056
trxa	trxb	0.400772	0.185	0.0153106
tsf	tuf	0.889148	0.671	0.641032
tsf	upps	0.267154	0.063	0.0095339
uvra	uvrb	-	-	-
uvra	uvrc	-	-	-
uvrb	uvrc	0.610345	0.581	0.0238801
walk	walr	0.553	0.314	0.094

## Sheet: Random_Gram-positive_PPIs
Supplementary Data, File 1. List of randomly generated Gram-positive PPIs modeled by AF2. Protein1 and Protein2 are the two proteins involved in the binary interaction. For each protein pair, the ipTM, pDockQ and pDockQ2 scores corresponding to the best model is provided.
Protein1	Protein2	ipTM	pDockQ	min pDockQ2
acca	adk	0.491916	0.145	0.0226662
acca	ddl	0.293518	0.073	0.00989918
acca	fole	0.276689	0.176	0.0107879
acca	ispe	0.284313	0.191	0.00959272
acca	metk	0.329863	0.042	0.0108528
acca	mray	0.263234	0.049	0.00949393
acca	muri	0.226353	0.481	0.00984764
acca	rny	0.220515	0.058	0.00817454
acca	siga	0.209268	0.072	0.0100557
acca	tmk	0.272704	0.081	0.0102503
accb	coae	0.284688	0.165	0.018964
accb	dnak	0.372245	0.123	0.01
accb	dnax	0.253362	0.022	0.011
accb	gpmi	0.320174	0.103	0.00912224
accb	guaa	0.336693	0.065	0.0109738
accb	mura	0.515533	0.156	0.0180533
accb	murg	0.36855	0.11	0.00945446
accb	nade	0.634196	0.287	0.0790262
accb	pyrh	0.250047	0.075	0.010249
accb	trxb	0.252665	0.111	0.0150446
accb	ybey	0.736612	0.091	0.0697458
accc	liga	0.241423	0.289	0.00937876
accd	dnad	0.20875	0.048	0.0102389
accd	fabk	0.242293	0.052	0.00950006
accd	fole	0.215693	0	0.00734779
accd	ftsh	0.241777	0.062	0.00910028
accd	grea	0.227033	0.08	0.00964358
accd	mukb	0.280072	0.02	0.00734779
accd	murb	0.239455	0.231	0.010057
accd	mure	0.247568	0.285	0.0102015
accd	ssb	0.234426	0.071	0.00910195
accd	walr	0.23563	0.112	0.00938849
acka	clpx	0.338423	0.196	0.010926
acka	dnak	0.264839	0.11	0.0098925
acka	gmk	0.320143	0.068	0.0122635
acka	gyrb	0.219698	0.448	0.0100153
acka	mvad	0.272738	0.147	0.0122915
acka	pyk	0.383749	0.041	0.0144417
acka	pyrg	0.296658	0.048	0.00964999
acpp	daph	0.364632	0.076	0.0117407
acpp	dnab	0.618969	0.092	0.0525642
acpp	eno	0.360807	0.133	0.0149006
acpp	mvad	0.399059	0.073	0.0125947
acpp	rpoa	0.330924	0.056	0.00968843
acpp	sece	0.286889	0.065	0.0174327
acpp	upps	0.402296	0.156	0.0189858
acps	bira	0.310994	0.164	0.00892076
acps	eno	0.316434	0.161	0.0117307
acps	era	0.214101	0.26	0.0110648
acps	gapa	0.262056	0.05	0.00981444
acps	gmk	0.275114	0.179	0.00914671
acps	mena	0.36396	0.105	0.0124851
acps	metk	0.405669	0.073	0.0170649
acps	mura	0.300289	0.086	0.00953683
acps	ppac	0.20478	0	0.00734779
acps	pyrh	0.252335	0	0.00734779
acps	tpia	0.231353	0	0.00734779
acps	ybey	0.241858	0.263	0.00972682
adk	cdsa	0.258518	0.102	0.00910958
adk	mure	0.284874	0.421	0.00943402
adk	pfka	0.242615	0.118	0.00899709
adk	rnpa	0.264416	0.201	0.0109194
asd	atpd	0.240387	0.339	0.00967609
asd	folb	0.273965	0.03	0.0100331
asd	gyra	0.242055	0.299	0.00919979
asd	mray	0.244252	0.176	0.00951495
asd	sufs	0.215629	0	0.00734779
atpa	coae	0.267906	0.19	0.00901322
atpa	dnab	0.235719	0.133	0.00924499
atpa	fabk	0.349351	0.14	0.0091696
atpa	gpmi	0.709448	0.285	0.00988324
atpa	ppac	0.237491	0.054	0.00892457
atpd	ddl	0.300844	0.08	0.0101498
atpd	dnaa	0.411088	0.252	0.00947896
atpd	gyrb	0.246578	0.067	0.00937363
atpd	prfa	0.244525	0.059	0.0100089
atpd	tagg	0.525567	0.049	0.0232422
atpe	mrec	0.210971	0.037	0.0108071
atpe	murb	0.344886	0.025	0.0132175
atpe	recf	0.360721	0.03	0.0113415
atpe	rny	0.205977	0.019	0.00977586
atpf	coad	0.164877	0	0.00734779
atpg	der	0.226539	0.32	0.00907887
atpg	folc	0.288707	0.164	0.00994009
atpg	folk	0.285725	0.175	0.00962444
atpg	glmm	0.238705	0.174	0.00995451
atpg	guaa	0.232745	0.144	0.00879148
atpg	mrec	0.205205	0.146	0.00963351
atpg	murd	0.245684	0.139	0.00891738
atpg	sufd	0.57659	0.11	0.00931094
atpg	tkt	0.269261	0.034	0.00968207
atph	dnad	0.200345	0.108	0.00983243
atph	gapa	0.256477	0.131	0.00949115
atph	tmk	0.233701	0.195	0.00927122
bira	folb	0.313056	0.104	0.00961932
bira	liga	0.234665	0.202	0.0105201
bira	rsga	0.236162	0.082	0.00953391
cdsa	fabh	0.279814	0.103	0.0107148
cdsa	gpmi	0.240944	0.019	0.00734779
cdsa	murb	0.245979	0.127	0.0097598
cdsa	murt	0.24821	0.318	0.00912827
cdsa	tkt	0.313189	0.105	0.010256
clpx	daph	0.219547	0.205	0.00811026
clpx	dnae	0.297741	0.128	0.00893781
clpx	folb	0.240922	0.02	0.010588
clpx	gmk	0.341068	0.17	0.0156049
clpx	grea	0.250314	0.055	0.00897159
clpx	ispg	0.211418	0.215	0.00958242
clpx	menb	0.214391	0.022	0.00970054
clpx	pria	0.306234	0.248	0.0098114
clpx	rimm	0.306428	0.129	0.00948828
clpx	sufd	0.264452	0.093	0.00913673
cmk	fabz	0.193118	0.111	0.00953815
cmk	gpsa	0.257847	0.16	0.00971747
cmk	ispd	0.19189	0.252	0.0091716
cmk	pcra	0.249287	0.206	0.00922807
cmk	tuf	0.260193	0.087	0.00897946
coabc	der	0.204428	0.564	0.00969097
coabc	divib	0.192136	0.144	0.0095597
coabc	fusa	0.293546	0.286	0.0123178
coabc	muri	0.262244	0.2	0.01066
coabc	prfa	0.200993	0.068	0.00900148
coabc	pyrc	0.246847	0.095	0.00957758
coabc	rpob	0.195054	0.051	0.00897704
coabc	sufd	0.228824	0.542	0.00911769
coabc	upps	0.235491	0.024	0.00979627
coad	coad	0.223412	0.111	0.033
coad	ispg	0.244397	0.071	0.00917458
coad	nrde	0.354635	0.036	0.00927177
coad	sufs	0.280025	0.023	0.00734779
coad	tpia	0.233533	0.047	0.00974731
coae	coae	0.328903	0.136	0.00986891
coae	dnab	0.217564	0.046	0.00961995
coae	folk	0.281059	0.22	0.0106589
coae	guab	0.292387	0.16	0.00954536
coae	lysc	0.23176	0.314	0.00930016
coae	mvad	0.551142	0.326	0.011663
coae	nadd	0.311528	0.208	0.0101355
coae	rpoz	0.345155	0.183	0.0113519
coae	secy	0.34676	0.085	0.0120287
coae	sufd	0.311079	0.184	0.00962683
coq7	lysc	0.226435	0.134	0.0100591
daca	murb	0.2927	0.386	0.00956794
dapb	liga	0.389622	0.165	0.0104793
dape	mura	0.316763	0.177	0.00974242
dapf	dnab	0.245597	0.157	0.010257
dapf	dnad	0.23611	0.428	0.0106912
dapf	dnag	0.552825	0.33	0.0157503
dapf	era	0.258005	0.137	0.00946409
dapf	grea	0.69685	0.261	0.0185598
dapf	mrec	0.238231	0.138	0.0102843
dapf	muri	0.250372	0.366	0.0118871
dapf	parc	0.251265	0.135	0.00928387
dapf	prfa	0.212378	0.065	0.00938163
dapf	rimm	0.227415	0.118	0.00982681
dapf	rnpa	0.305931	0.169	0.010058
dapf	trxb	0.212878	0.267	0.00973676
dapf	zwf	0.243405	0.212	0.00940287
dapg	ddl	0.229808	0.058	0.00979498
dapg	fabg	0.188612	0	0.00734779
dapg	ftsy	0.213138	0.155	0.00884529
dapg	infa	0.266885	0.185	0.00989716
dapg	metk	0.279821	0.031	0.00934996
dapg	pria	0.256848	0.219	0.00929207
dapg	sece	0.295704	0.044	0.00979047
dapg	upps	0.300829	0.102	0.0135186
dapg	ybey	0.257914	0.172	0.00921783
daph	dnag	0.23679	0.164	0.0100005
daph	dnax	0.216253	0.103	0.00913953
daph	fabf	0.211392	0	0.00734779
daph	ftsa	0.295999	0.132	0.0109125
daph	mray	0.218048	0.026	0.00974305
daph	nade	0.208557	0.035	0.00986275
daph	nusa	0.194921	0.018	0.00734779
daph	nusb	0.320878	0.022	0.0132059
daph	pyrh	0.192444	0	0.00734779
daph	recf	0.277341	0.116	0.00942523
daph	sufb	0.23636	0.082	0.00967766
daph	tmk	0.180867	0	0.00734779
daph	upps	0.354968	0.18	0.0101378
ddl	dnab	0.216077	0.061	0.00944529
ddl	dnad	0.243503	0.052	0.00996573
ddl	dnai	0.248909	0.068	0.0116738
ddl	ftsa	0.288843	0.038	0.0127545
ddl	pfka	0.276772	0.061	0.00938731
ddl	zwf	0.405959	0.026	0.0105179
der	fabh	0.244995	0.319	0.00934537
der	infa	0.374625	0.066	0.0100629
der	pare	0.22706	0.091	0.00907127
der	zwf	0.254179	0.466	0.00983166
divib	fusa	0.404272	0.15	0.00899478
divib	glms	0.400271	0	0.00734779
divib	murf	0.242351	0.322	0.00891851
divib	nrde	0.324827	0.246	0.0100841
divib	parc	0.225727	0.03	0.00900925
divib	rpoc	0.305381	0.031	0.00934391
divib	sufd	0.474344	0.216	0.00918663
divib	trxa	0.347743	0.153	0.0142919
dnaa	fabk	0.24645	0.194	0.00972627
dnaa	folc	0.481443	0.162	0.0136528
dnaa	glmu	0.202247	0.048	0.0098848
dnaa	guaa	0.227724	0.295	0.00966037
dnaa	guab	0.251458	0.233	0.00962757
dnab	eno	0.254909	0.218	0.0101088
dnab	fabg	0.180946	0.018	0.00734779
dnab	guaa	0.220135	0.238	0.00962144
dnab	ispd	0.239017	0.201	0.00869942
dnab	nade	0.19288	0.449	0.0102555
dnab	pyk	0.218703	0.02	0.00933077
dnac	engb	0.235907	0.116	0.00948496
dnac	fabh	0.220605	0.037	0.00956285
dnac	fba	0.212284	0.166	0.00909055
dnac	gpmi	0.23271	0.242	0.00962584
dnac	gpsa	0.231005	0.024	0.00953974
dnac	grea	0.243707	0.188	0.00907971
dnac	infa	0.331497	0.051	0.00948284
dnac	nadd	0.197978	0.299	0.00871935
dnac	pgsa	0.23982	0.113	0.00999041
dnac	rpe	0.203513	0.1	0.00992443
dnac	secy	0.317948	0.09	0.0109287
dnac	sufb	0.258432	0.067	0.00888286
dnac	tarj	0.227505	0.218	0.00942664
dnac	zwf	0.270398	0.392	0.00919892
dnad	fabg	0.22971	0.125	0.00961782
dnad	ftsl	0.294444	0.09	0.0141102
dnad	fusa	0.326135	0.178	0.0117649
dnad	glmu	0.22082	0.054	0.0101814
dnad	liga	0.342695	0.135	0.0115648
dnad	metk	0.272075	0.036	0.0112845
dnad	murd	0.251113	0.073	0.00990614
dnad	mure	0.256022	0.094	0.0100219
dnad	nrdf	0.289587	0.147	0.0110237
dnad	pgsa	0.221034	0.03	0.0111491
dnad	siga	0.201897	0.035	0.00812938
dnad	topa	0.265855	0.115	0.0080431
dnad	tpia	0.189941	0.105	0.00986237
dnad	upps	0.395307	0.075	0.00919386
dnae	dnai	0.368832	0.075	0.0125335
dnae	fabh	0.30327	0.293	0.00959663
dnae	fabk	0.747948	0.244	0.271143
dnae	fabz	0.353605	0.051	0.00933207
dnae	fole	0.293826	0.019	0.00965086
dnae	pfka	0.280977	0.022	0.00940202
dnae	rsga	0.707822	0.132	0.00953414
dnae	sece	0.352509	0.021	0.00944886
dnae	sepf	0.319806	0.03	0.00975657
dnag	dnai	0.21566	0.231	0.01
dnag	folb	0.577864	0.069	0.00922739
dnag	glmm	0.265041	0.202	0.0107854
dnag	grol	0.229514	0.151	0.0089865
dnag	parc	0.238961	0.044	0.009
dnag	pfka	0.202428	0.022	0.00777962
dnag	sepf	0.25994	0.121	0.00938548
dnai	dnax	0.3281	0.113	0.00926418
dnai	fba	0.275691	0.169	0.0125157
dnai	gmk	0.260476	0.056	0.0095122
dnai	rpoz	0.227097	0.05	0.00897336
dnai	ybey	0.227692	0.266	0.00902819
dnaj	mukf	0.207014	0.12	0.00932444
dnak	infc	0.568535	0.14	0.0238167
dnak	mure	0.387934	0.11	0.009
dnak	murt	0.322754	0.22	0.0102643
dnak	plsx	0.759383	0.149	0.432812
dnak	ppac	0.274636	0.168	0.00962932
dnak	walr	0.463891	0.19	0.0100492
dnan	fabg	0.239355	0.023	0.011
dnan	fabk	0.255716	0.054	0.00952932
dnan	fole	0.252221	0.024	0.00964134
dnan	hprk	0.212651	0.244	0.00942134
dnan	infa	0.402237	0.189	0.0102521
dnan	liga	0.369187	0.147	0.00949803
dnan	murb	0.261596	0.393	0.0104855
dnan	sece	0.285678	0.023	0.0115979
dnax	folb	0.2211	0.013	0.01
dnax	mena	0.230779	0.148	0.0100838
dnax	mvad	0.21078	0.094	0.00926127
dnax	nade	0.1913	0	0.00734779
dnax	pcra	0.245353	0.056	0.00917476
dnax	zwf	0.261612	0.185	0.0106886
efp	gpmi	0.315715	0.246	0.00949183
efp	gyrb	0.291423	0.066	0.00981984
efp	rnpa	0.395862	0.126	0.0198445
efp	rpoz	0.745927	0.312	0.0134805
efp	sece	0.24541	0.074	0.0136859
efp	sufs	0.263494	0.027	0.00966426
efp	topa	0.29049	0.065	0.00872891
engb	fole	0.236308	0.07	0.00911573
engb	ftsa	0.565667	0.229	0.0164031
engb	guaa	0.25831	0.13	0.00938383
engb	liga	0.264258	0.194	0.00929257
engb	nrde	0.342728	0.095	0.00929299
engb	nrdf	0.273737	0.124	0.00965251
engb	ppac	0.263405	0.138	0.00854416
eno	fabg	0.254462	0	0.00734779
eno	gpsb	0.346095	0.052	0.0268803
eno	grpe	0.280841	0.303	0.0111335
eno	ispg	0.239286	0.077	0.00982863
eno	nrde	0.330069	0.272	0.00981852
eno	rpoz	0.300248	0.186	0.00981207
eno	rsga	0.270586	0.088	0.0103555
eno	sufc	0.256933	0.5	0.00957002
eno	tsf	0.277202	0.067	0.0105248
era	ftsa	0.359855	0.215	0.0100309
era	ftsl	0.352565	0.12	0.00967956
era	mura	0.275109	0.181	0.0092217
era	muri	0.319174	0.138	0.0100203
era	nadd	0.210862	0.181	0.00876904
era	nrde	0.31381	0.159	0.009426
era	rpoc	0.552091	0.041	0.0177265
ezra	sufc	0.649311	0.173	0.0105461
fabd	ftsa	0.249098	0.086	0.00974317
fabd	gyrb	0.25471	0.228	0.00967096
fabd	mray	0.26244	0.05	0.010385
fabd	murc	0.265087	0.405	0.00976269
fabd	pcra	0.302282	0.099	0.00879114
fabd	pgk	0.286188	0.347	0.00979031
fabd	rimm	0.31883	0.124	0.0154857
fabd	sufb	0.253089	0.182	0.00996732
fabf	fba	0.212766	0	0.00734779
fabf	fusa	0.332293	0.056	0.0131758
fabf	gyra	0.221804	0	0.00734779
fabf	muri	0.218856	0.078	0.00989726
fabf	pria	0.252452	0.168	0.00988883
fabf	pyrh	0.22076	0.022	0.00974255
fabf	rpe	0.288686	0	0.00734779
fabf	tsf	0.253746	0.22	0.0100033
fabg	ftsz	0.267508	0.46	0.0100421
fabg	groel	0.284141	0.065	0.00800382
fabg	infa	0.362156	0.178	0.0142587
fabg	ispf	0.234942	0	0.00734779
fabg	murd	0.228009	0.101	0.00956199
fabg	pgi	0.232414	0	0.00734779
fabg	recu	0.199589	0.25	0.00933239
fabh	fba	0.22005	0.03	0.00939821
fabh	folk	0.312084	0.146	0.00997696
fabh	gyrb	0.223338	0.342	0.00933393
fabh	ispg	0.210203	0.299	0.00935837
fabh	murd	0.228655	0.383	0.0094142
fabh	murg	0.25266	0.077	0.00938601
fabh	rimm	0.316225	0.107	0.00999681
fabh	sece	0.314801	0.036	0.012274
fabi	mrec	0.223953	0.097	0.00884269
fabk	infa	0.355092	0.129	0.0101742
fabk	ispe	0.684557	0.182	0.126571
fabk	pcra	0.237102	0.123	0.00934268
fabk	plsx	0.2312	0.019	0.00734779
fabk	pria	0.365132	0.21	0.00905595
fabk	rnpa	0.269735	0.188	0.00962031
fabk	tarj	0.226774	0.205	0.00950866
fabz	gapa	0.249754	0	0.00734779
fabz	grea	0.272776	0.041	0.0102799
fabz	grol	0.287968	0.029	0.0110549
fabz	guab	0.299109	0.063	0.0109238
fabz	pyrg	0.264397	0	0.00734779
fabz	topa	0.321944	0.019	0.00734779
fba	ftsa	0.419779	0.157	0.0109576
fba	rsga	0.217768	0.121	0.00918041
fba	smc	0.264504	0.033	0.010733
fba	sufs	0.23704	0.019	0.00734779
ffh	ftsl	0.377736	0.126	0.0194867
ffh	gyrb	0.418973	0.108	0.0102722
fni	fusa	0.239176	0.228	0.00981916
fni	gmk	0.276927	0.053	0.00970377
fola	murc	0.306234	0.326	0.00958878
folb	glmm	0.35575	0.032	0.0170362
folb	ispg	0.279104	0.077	0.0109082
folb	mukb	0.270873	0	0.00734779
folb	nadd	0.2447	0.072	0.00939873
folc	fusa	0.238576	0.287	0.00921058
folc	mrec	0.306338	0.188	0.00941032
folc	rimm	0.341876	0.169	0.0102571
folc	rpe	0.314227	0.213	0.00932499
folc	rpoa	0.270055	0.087	0.0119099
folc	tuf	0.48656	0.067	0.0418275
fole	fole	0.485453	0.276	0.0115617
fole	gpsb	0.194214	0.027	0.0151365
fole	nrdf	0.283101	0.163	0.0105322
fole	pare	0.24627	0.068	0.00877685
fole	pfka	0.224902	0.018	0.00734779
folk	infa	0.368318	0.068	0.0116822
folk	infc	0.584153	0.226	0.0195093
folk	liga	0.241122	0.139	0.00882519
folk	sece	0.219487	0.032	0.0093618
folk	tuf	0.342637	0.102	0.0103361
folp	mrec	0.231936	0.148	0.00911472
folp	murf	0.257853	0.2	0.00924688
folp	topa	0.305604	0.184	0.00976655
ftsa	glms	0.323022	0.084	0.0112053
ftsa	guaa	0.54967	0.103	0.00942547
ftsa	nrde	0.310785	0.091	0.0103371
ftsa	rsga	0.261555	0.153	0.00962404
ftsa	zwf	0.281383	0.133	0.011233
ftse	lysc	0.243771	0.051	0.0091415
ftsh	ftsl	0.365616	0.054	0.0165026
ftsh	fusa	0.224596	0.03	0.00910232
ftsh	tmk	0.243081	0.094	0.010413
ftsh	zwf	0.377402	0.115	0.0109334
ftsl	groes	0.235694	0.046	0.00876783
ftsl	mrec	0.378725	0.065	0.0105008
ftsl	murf	0.304604	0.077	0.00942527
ftsl	mvad	0.338831	0.068	0.0121565
ftsl	reca	0.327504	0.065	0.0158686
ftsy	glmu	0.214739	0.466	0.00941071
ftsy	grea	0.265646	0.238	0.0105783
ftsy	grpe	0.234201	0.05	0.00916231
ftsy	ispd	0.249052	0.145	0.00874006
ftsy	murd	0.327283	0.343	0.00953974
ftsy	prfa	0.30589	0.048	0.0128118
ftsy	siga	0.230219	0.037	0.00983807
ftsz	pare	0.27939	0.363	0.00924616
ftsz	sufd	0.608368	0.222	0.0678195
fusa	pgsa	0.293664	0.07	0.00905351
fusa	plsy	0.322314	0.146	0.00929712
fusa	zwf	0.626805	0.293	0.00959872
gapa	murc	0.220801	0.154	0.00916734
gapa	nrde	0.452058	0.254	0.00949384
gapa	rpob	0.195562	0	0.00734779
gapa	ssb	0.424976	0.217	0.0984094
gapa	zwf	0.239652	0.046	0.00970777
glmm	infb	0.25568	0.186	0.0100219
glmm	nrdi	0.300563	0.38	0.00949301
glmm	prfa	0.24363	0.202	0.00886822
glmm	tarj	0.439423	0.022	0.0122772
glms	guab	0.309801	0.131	0.00927854
glms	ppac	0.224301	0.022	0.00947364
glms	sufb	0.323495	0	0.00734779
glms	topa	0.267479	0.135	0.00941863
glmu	grol	0.276858	0.025	0.0108518
glmu	ispf	0.321462	0	0.00734779
glmu	mena	0.371677	0.028	0.0201226
glmu	rnpa	0.255701	0.018	0.00971985
glmu	sufd	0.220997	0.161	0.00916706
gmk	groel	0.286756	0.218	0.00948394
gmk	ispf	0.244204	0.171	0.00903671
gmk	pfka	0.260239	0	0.00734779
gmk	pgk	0.29761	0.315	0.00912822
gmk	plsx	0.239137	0.084	0.00944547
gmk	sece	0.24891	0.046	0.00862203
gmk	zwf	0.278158	0.22	0.0088928
gpmi	groel	0.24182	0.318	0.00955177
gpmi	muri	0.296184	0.229	0.00946498
gpmi	ruva	0.270744	0.037	0.0080469
gpmi	sece	0.316744	0.027	0.00843994
gpmi	sufd	0.254599	0.076	0.00992798
gpmi	sufs	0.238852	0.413	0.00961488
gpsa	ispe	0.225613	0.346	0.00959781
gpsa	pgi	0.267592	0	0.00734779
gpsa	polc	0.313721	0.093	0.00914941
gpsa	rpoz	0.376748	0.089	0.013465
gpsa	sufd	0.310395	0.266	0.0102936
gpsb	ppac	0.292573	0.079	0.00992546
gpsb	prfa	0.297393	0.062	0.016929
gpsb	pyk	0.246671	0.019	0.00908624
grea	groes	0.295162	0.218	0.0090079
grea	hprk	0.210537	0.137	0.00867218
grea	nadd	0.296398	0.133	0.0101444
grea	seca	0.313808	0.033	0.0090121
groes	murt	0.45918	0.121	0.00911702
groes	pare	0.297126	0.036	0.00828368
groes	pgi	0.299107	0.078	0.0104778
groes	rpoz	0.628346	0.229	0.0249465
groes	sufc	0.404155	0.074	0.0138348
grol	ssb	0.265277	0.074	0.0101109
grpe	gyra	0.274776	0.044	0.0087978
guaa	hprk	0.245878	0.061	0.00917697
guab	gyrb	0.235424	0.192	0.00857597
guab	ispd	0.300453	0.081	0.00936843
guab	murc	0.262492	0.215	0.00888746
guab	murt	0.297739	0.055	0.00914394
guab	tarj	0.278008	0.075	0.00971419
gyra	ispe	0.562197	0.217	0.0106754
gyra	murg	0.278118	0.037	0.00985874
gyra	pgk	0.28049	0.12	0.00910107
gyra	ppac	0.242394	0.021	0.00882116
gyrb	ispe	0.286362	0.164	0.0099009
gyrb	murb	0.258198	0.278	0.00943868
gyrb	pare	0.606605	0.637	0.203074
gyrb	pgsa	0.301415	0.063	0.00935719
gyrb	prfa	0.226806	0.131	0.00990351
gyrb	ruva	0.236765	0.033	0.00895493
gyrb	sufc	0.259952	0.11	0.00914725
gyrb	topa	0.249515	0.136	0.00857593
hemh	mrdb	0.284905	0.092	0.00839291
hola	mura	0.247186	0.15	0.0093917
hola	murd	0.249782	0.293	0.00993948
hprk	nrdf	0.275487	0.142	0.0105874
imp	mukb	0.263627	0.018	0.00734779
infa	nade	0.291377	0.118	0.0106767
infc	pgsa	0.184734	0.019	0.00734779
iscs	mrda	0.276448	0.424	0.00931458
ispd	ybey	0.275803	0.156	0.0107005
ispd	zwf	0.337228	0.032	0.0096883
ispe	metk	0.235854	0.347	0.00937631
ispe	murd	0.25633	0.379	0.00970474
ispe	reca	0.234805	0.128	0.0095163
ispe	rsga	0.228412	0.089	0.00969072
ispe	ruvb	0.219281	0.228	0.00937709
ispe	sece	0.307886	0.027	0.00955583
ispe	secy	0.24766	0.159	0.00945448
ispe	smc	0.241874	0.03	0.00893524
ispf	nadd	0.262974	0.018	0.00734779
ispf	pfka	0.253647	0	0.00734779
ispf	rsga	0.550272	0.075	0.0250348
ispf	sufs	0.266139	0	0.00734779
ispf	tuf	0.294309	0.188	0.00955297
isph	liga	0.273335	0.159	0.00982007
isph	seca	0.386574	0.05	0.0127734
isph	sufb	0.265787	0.239	0.0109351
lepb	murc	0.257658	0.499	0.00915373
lepb	rho	0.268068	0.137	0.00969472
lepb	yidc	0.410136	0.19	0.0116927
lexa	lysc	0.260484	0.257	0.00902541
liga	mrdb	0.338609	0.1	0.0103795
liga	plsx	0.238663	0.034	0.00922465
liga	prfa	0.389526	0.08	0.00922877
liga	tarj	0.215133	0.164	0.00934057
liga	tsf	0.256414	0.344	0.00916927
liga	ubid	0.22378	0.559	0.00935778
lysc	murd	0.24148	0.313	0.00987911
mena	pyk	0.254901	0.069	0.0100284
mena	seca	0.340892	0.068	0.0104388
mena	sufb	0.280746	0.089	0.0101757
mena	sufs	0.287426	0.182	0.00951623
menb	ssb	0.247749	0	0.00734779
menb	sufc	0.193785	0.066	0.0097994
metk	mrdb	0.323283	0.039	0.0152202
metk	murt	0.331015	0.058	0.0116721
metk	nrde	0.386738	0.034	0.010247
metk	pyrc	0.247014	0.429	0.00957894
metk	topa	0.257912	0.038	0.00953227
metk	upps	0.276019	0.146	0.0100674
metk	ybey	0.285052	0.157	0.0105402
mray	ppac	0.216611	0.018	0.00734779
mray	pria	0.290927	0.059	0.00946225
mray	sufc	0.379053	0.108	0.012747
mrda	purb	0.313578	0.072	0.00923243
mrda	rpoc	0.380803	0.034	0.0088401
mrdb	mukb	0.307011	0.019	0.00734779
mrdb	pare	0.232833	0.154	0.00931969
mrdb	ubig	0.264636	0.044	0.00841447
mreb	secd	0.237249	0.286	0.0100678
mreb	sece	0.404496	0.038	0.0219673
mrec	rsga	0.224176	0.078	0.00944621
mukf	seca	0.31224	0.047	0.00930445
mura	murb	0.32116	0.221	0.0084047
mura	upps	0.310729	0.148	0.00943698
murb	parc	0.28978	0.254	0.00855403
murb	pyk	0.23877	0.095	0.00905425
murc	mvad	0.255188	0.123	0.0111728
murc	sufd	0.247542	0.154	0.00903069
murc	tmk	0.286997	0.193	0.00930712
murc	ybey	0.418324	0.226	0.0105648
murd	murd	0.244025	0.209	0.00950664
murd	plsx	0.228882	0.385	0.00922169
murd	pyrf	0.290116	0.123	0.00997124
murd	thil	0.234731	0.202	0.00931593
murd	tmk	0.265731	0.225	0.00957545
murd	trxb	0.239461	0.318	0.00928244
mure	pyrh	0.305075	0.118	0.010001
mure	tpia	0.241918	0.134	0.0096143
mure	tsf	0.260562	0.211	0.00935479
murf	pgk	0.587371	0.175	0.029067
murf	ppac	0.22578	0.211	0.00932445
murf	pria	0.243293	0.501	0.00923281
murf	rpoz	0.397786	0.132	0.0151783
murf	sufd	0.24656	0.178	0.00916877
murf	ybey	0.322205	0.153	0.00925611
murg	pcra	0.254178	0.211	0.00849111
murg	plsy	0.356622	0.184	0.0210113
murg	polc	0.332972	0.27	0.00922246
murg	pyrh	0.262399	0.101	0.0146487
murg	tmk	0.243494	0.122	0.00920618
murg	zwf	0.263129	0.127	0.00919381
muri	parc	0.256276	0.069	0.00902025
muri	sece	0.270377	0.098	0.0119204
muri	sufs	0.290076	0.146	0.0103663
muri	topa	0.319089	0.132	0.00898706
murt	sufs	0.235349	0.159	0.00877712
murt	tmk	0.281255	0.15	0.00997014
mvad	ptsi	0.247935	0.539	0.00938044
mvad	rny	0.250298	0.048	0.00938204
nadd	parc	0.298829	0.105	0.00892244
nadd	pgi	0.26	0.184	0.00894516
nadd	rpoa	0.303583	0.07	0.00934896
nadd	siga	0.23279	0.117	0.00888184
nadd	sufd	0.455753	0.165	0.0126273
nadd	tpia	0.210276	0.162	0.0101748
nadd	zwf	0.248532	0.157	0.00951987
nade	secy	0.243235	0.081	0.0106275
nade	walr	0.211369	0.189	0.00955542
nrde	reca	0.380604	0.07	0.0096764
nrde	upps	0.670571	0.128	0.0761992
nrdf	pria	0.329668	0.295	0.0113434
nrdf	tarj	0.20492	0.201	0.00867779
nrdf	tsf	0.367931	0.049	0.0107601
nrdi	parc	0.258007	0.064	0.00942616
nrdi	pfka	0.278033	0.032	0.0101199
nrdi	plsy	0.40188	0.119	0.027017
nrdi	pyk	0.246101	0.224	0.00897129
nrdi	tarj	0.395498	0.166	0.0139583
nusa	sece	0.218401	0	0.00734779
nusb	prfb	0.455955	0.063	0.0104956
nusg	smpb	0.214853	0.084	0.0121702
nusg	thya	0.247563	0.173	0.0107536
parc	recf	0.378561	0.024	0.0137868
parc	rsga	0.305925	0.063	0.0100109
parc	secy	0.303118	0	0.00734779
pare	plsx	0.46612	0.034	0.00891973
pare	prfa	0.225248	0.455	0.00937085
pare	sepf	0.3133	0.037	0.00820201
pare	walr	0.259422	0.079	0.00913456
pcra	smpb	0.325709	0.048	0.00923518
pcra	tmk	0.264135	0.104	0.00961966
pcra	tsf	0.257897	0.112	0.00983951
pfka	prfb	0.198948	0.06	0.00956671
pfka	upps	0.216765	0.185	0.00949106
pgi	recu	0.279119	0	0.00734779
pgi	rny	0.220341	0.074	0.00974608
pgi	smpb	0.324738	0.16	0.00966639
pgi	tsf	0.292312	0.189	0.0108161
pgk	prfa	0.334017	0.172	0.00859464
pgk	rpe	0.275996	0.16	0.0101691
pgk	siga	0.309795	0.057	0.0107695
pgk	tarj	0.244663	0.627	0.00904129
pgk	tmk	0.293679	0.286	0.00987903
pgsa	tagg	0.262251	0.134	0.00975467
plsx	prfa	0.255987	0.251	0.0126575
plsx	tagg	0.387398	0.051	0.00943143
plsx	tpia	0.255275	0.054	0.0100172
plsx	tsf	0.251923	0.057	0.00856022
pola	sufd	0.263282	0.04	0.00906184
ppac	pyrg	0.227919	0.055	0.00906505
ppac	topa	0.273144	0.334	0.00950817
prfa	rny	0.285351	0.032	0.00834467
prfa	tpia	0.234136	0.082	0.0100285
prfa	trxa	0.58007	0.065	0.0296222
prfb	tpia	0.207134	0.239	0.0098769
prfb	uvrb	0.32709	0.151	0.00937754
pria	tarj	0.280569	0.228	0.00962963
pria	topa	0.247105	0.564	0.00931101
ptsi	pyrc	0.238452	0.422	0.00956123
ptsi	rpoz	0.488814	0.098	0.0128332
pyrc	ruvb	0.27831	0.164	0.00966844
pyrf	sepf	0.232576	0.045	0.00944963
pyrg	tuf	0.292848	0.323	0.00903397
reca	thya	0.267345	0.115	0.00990527
recf	uvrc	0.207527	0.09	0.00953509
recu	rpoz	0.385032	0	0.00734779
rimm	rpe	0.292625	0.093	0.0100922
rimm	sufc	0.274827	0.044	0.0104898
rimm	zwf	0.304369	0.137	0.00936129
rny	tagg	0.27287	0.048	0.00950134
rpe	rpoz	0.271719	0.106	0.00992898
rpe	secy	0.229646	0.114	0.0107395
rpoa	sufc	0.202406	0.021	0.00734779
rpoa	tagg	0.202199	0.023	0.0101476
rpoa	tpia	0.204633	0.045	0.00982866
rpoc	ssb	0.375533	0.02	0.00807744
rpoz	sece	0.138334	0.029	0.0127924
rsga	sufs	0.25841	0.091	0.00862436
rsga	tarj	0.240727	0.137	0.00962223
ruva	smc	0.237847	0	0.00734779
ruva	sufs	0.333118	0.49	0.00964294
sece	sufd	0.318765	0.025	0.0140574
sece	tkt	0.360889	0.02	0.0103257
sece	walk	0.250877	0.02	0.00923699
secy	siga	0.381983	0.023	0.0121762
secy	ssb	0.260502	0.064	0.00945247
secy	tarj	0.224983	0.059	0.00995909
secy	zwf	0.242524	0.268	0.00955631
smc	zwf	0.27811	0.341	0.00942902
sufb	tpia	0.233892	0.037	0.00914489
sufc	zwf	0.293338	0.151	0.00981831
sufd	zwf	0.30423	0.172	0.00954692
sufs	tmk	0.276227	0.195	0.00963968
sufs	tpia	0.23547	0.064	0.00946664
sufs	tsf	0.328521	0.284	0.0097734
tagg	tpia	0.22292	0.09	0.00943442
tmk	ybey	0.303649	0.107	0.00910855
tpia	tsf	0.246578	0.134	0.0095183

## Sheet: Synthetically_lethal
Supplementary Data, File 1. List of selected synthetically lethal interactions from the Mslar database (Zhu et al., 2023). Protein1 and Protein2 are the two proteins involved in the binary interaction. For each protein pair, the ipTM, pDockQ and pDockQ2 scores corresponding to the best model is provided.
Protein1	Protein2	ipTM	pDockQ	pDockQ2
acee	ilvb	0.286401	0,021	0.0164203
acee	leuc	0.262951	0,085	0.0133358
acka	glta	0.205976	0,238	0.00963751
aroe	hisi	0.438466	0,443	0.0104438
aroE	yrdB	0.322899	0,221	0.015134
bgla	pgi	0.285842	0,698	0.00958987
cysc	cysp	0.212153	0.24	0.00953563
cysp	ssue	0.381626	0,056	0.0146359
gadb	proa	0.428008	0	0.00734779
gcvh	glya	0.465671	0,116	0.0129405
gcvp	glya	0.264015	0,198	0.00890113
gcvt	glya	0.228313	0,316	0.00962725
glnA	glnH	0.237466	0,179	0.00911688
gltA	pta	0.236187	0,022	0.00992224
gltA	zwf	0.236682	0,056	0.0123655
guaa	lysa	0.295965	0,049	0.00971641
hisb	xtha	0.230177	0,118	0.00954325
hisi	ilvb	0.25016	0,019	0.00734779
metl	thra	0.439596	0,466	0.239182
nadA	pncB	0.621773	117	0.00880428
nuog	pura	0.63413	19	0.00734779
pura	reca	0.28107	0,276	0.0100245
pyrd	upp	0.209999	0,095	0.0104382
pyri	thra	0.228198	0,108	0.0107701
rodz	yhcb	0.247206	0,084	0.02049
trpd	yjji	0.3728	0,254	0.00935013
upp	pyri	0.177259	0,207	0.0103506
yhcf	ytfl	0.279219	0,144	0.00935266
