# Supplementary material for: Structural assembly of the bacterial essential interactome
Source: eLife. 2024 Jan 16;13:e94919. doi: 10.7554/eLife.94919 (PMC10863985; doi:10.7554/eLife.94919)
Supplement: Supplementary file 1. — The listed complexes were not included in the training dataset of AF and share <30% sequence identity with all models deposited in the PDB. [file elife-94919-supp1.xlsx]

## Sheet: Sheet1
PDB_ID	ipTM	TM_score	DockQ	I-RMSD
6ZH1	0.835	0.818	0.742	1.199
6ZHT	0.767	0.947	0.289	4.737
7ACW	0.846	0.862	0.903	0.835
7AL7	0.623	0.613	0.914	0.604
7B0W	0.868	0.956	0.769	1.354
7B2I	0.937	0.866	0.161	10.184
7B56	0.888	0.945	0.514	2.885
7BHF	0.738	0.886	0.012	17.267
7BN3	0.826	0.866	0.929	0.584
7D6Y	0.301	0.813	0.008	17.748
7DG5	0.768	0.828	0.581	2.335
7DNN	0.886	0.87	0.572	2.832
7E1S	0.901	0.964	0.715	1.45
7E50	0.896	0.64	0.906	0.786
7E5B	0.921	0.977	0.867	0.754
7EGS	0.806	0.982	0.853	0.87
7ENH	0.256	0.813	0.043	10.726
7EQX	0.888	0.783	0.825	1.171
7EQZ	0.936	0.995	0.945	0.548
7ESY	0.904	0.811	0.865	0.74
7F0U	0.938	0.911	0.021	13.166
7F28	0.95	0.977	0.894	0.789
7FDO	0.841	0.824	0.924	0.636
7FGM	0.553	0.969	0.149	9.932
7FIW	0.88	0.952	0.855	0.901
7G83	0.934	0.957	0.783	1.638
7JZQ	0.858	0.985	0.946	0.523
7M4M	0.922	0.415	0.519	3.027
7MMS	0.903	0.9	0.648	2.261
7MNI	0.846	0.78	0.697	2.143
7MO0	0.886	0.903	0.759	1.449
7N0E	0.843	0.752	0.643	1.943
7NA9	0.367	0.894	0.154	7.464
7NAM	0.654	0.952	0.206	5.778
7NFQ	0.391	0.904	0.381	3.128
7NI3	0.968	0.984	0.961	0.405
7OHI	0.816	0.976	0.826	0.78
7OPB	0.92	0.989	0.944	0.501
7OXY	0.963	0.921	0.917	0.544
7OZT	0.666	0.852	0.014	14.366
7P99	0.731	0.779	0.546	2.168
7PG5	0.904	0.939	0.713	1.877
7PJH	0.874	0.768	0.776	1.262
7PK4	0.932	0.976	0.778	1.084
7PU4	0.915	0.855	0.735	1.724
7Q5V	0.902	0.936	0.805	1.11
7Q83	0.706	0.695	0.303	14.058
7QFB	0.925	0.963	0.929	0.535
7QGF	0.737	0.606	0.732	1.387
7QNP	0.349	0.977	0.011	16.944
7R49	0.867	0.959	0.803	0.944
7R73	0.305	0.775	0.021	10.856
7R86	0.402	0.986	0.031	9.835
7RT7	0.936	0.9	0.909	0.63
7S7J	0.842	0.967	0.826	1.043
7S7R	0.44	0.906	0.015	12.705
7SCW	0.898	0.89	0.911	0.591
7SOL	0.944	0.951	0.859	0.83
7SZC	0.934	0.883	0.92	0.597
7TCX	0.928	0.98	0.627	3.079
7THQ	0.876	0.95	0.525	2.442
7TXY	0.913	0.977	0.92	0.503
7TZH	0.4	0.914	0.086	13.146
7U0T	0.676	0.774	0.037	17.98
7UBX	0.274	0.944	0.011	20.079
7UBZ	0.894	0.991	0.791	1.237
7UCC	0.779	0.735	0.603	2.035
7UL2	0.729	0.612	0.044	9.839
7V4Y	0.898	0.944	0.213	14.673
7V8E	0.657	0.964	0.091	9.897
7V8F	0.834	0.905	0.664	1.718
7VCR	0.934	0.938	0.927	0.558
7VF3	0.381	0.912	0.025	11.574
7VKB	0.935	0.783	0.694	3.246
7VLJ	0.933	0.985	0.851	1.171
7VNI	0.852	0.887	0.805	1.054
7VRC	0.888	0.601	0.903	0.683
7VVB	0.827	0.146	0.824	1.142
7VW6	0.928	0.92	0.787	1.177
7WKO	0.846	0.815	0.828	1.141
7WQQ	0.915	0.855	0.981	0.225
7WR3	0.859	0.58	0.413	4.352
7WR6	0.243	0.857	0.076	11.483
7WRS	0.845	0.96	0.669	0.709
7X2J	0.224	0.9	0.011	13.867
7X5E	0.729	0.745	0.791	1.027
7XEY	0.88	0.979	0.543	2.53
7XGE	0.916	0.956	0.912	0.581
7XKY	0.922	0.924	0.874	0.802
7XLD	0.333	0.592	0.539	1.768
7XOI	0.942	0.845	0.944	0.487
7XVK	0.746	0.93	0.468	2.357
7Y6B	0.899	0.955	0.82	1.182
7YK3	0.904	0.91	0.667	1.717
7YLS	0.93	0.968	0.874	0.963
7YTA	0.779	0.848	0.793	1.434
7YTU	0.789	0.63	0.737	1.643
7Z72	0.407	0.895	0.075	9.39
7ZH4	0.89	0.953	0.859	1.041
7ZMV	0.268	0.66	0.062	10.643
7ZPY	0.967	0.91	0.905	0.79
7ZRQ	0.894	0.864	0.767	1.81
8A82	0.949	0.866	0.929	0.634
8ADB	0.86	0.834	0.504	2.97
8AE4	0.425	0.985	0.046	11.823
8AKO	0.881	0.833	0.815	1.119
8ALK	0.42	0.933	0.046	14.246
8AOK	0.563	0.957	0.436	2.331
8ARC	0.841	0.828	0.698	1.85
8B2N	0.907	0.993	0.933	0.485
8B4O	0.943	0.986	0.038	14.789
8BFJ	0.907	0.939	0.448	4.617
8BJ8	0.966	0.993	0.959	0.41
8C3L	0.836	0.804	0.824	1.005
8CK5	0.883	0.789	0.929	0.531
8DC0	0.797	0.893	0.877	0.698
8DML	0.888	0.916	0.84	1.071
8DMS	0.47	0.92	0.108	6.552
8DSO	0.27	0.878	0.049	12.811
8DTN	0.482	0.914	0.091	9.006
8DY5	0.276	0.944	0.033	10.042
8E0E	0.921	0.858	0.622	2.824
8EGW	0.647	0.848	0.512	2.997
8EHE	0.912	0.948	0.577	3.255
8EJM	0.875	0.982	0.887	0.884
8ENB	0.872	0.819	0.695	1.943
8FN8	0.295	0.933	0.33	3.434
8GAK	0.807	0.769	0.697	1.027
8GM4	0.733	0.826	0.793	1.135
8GZX	0.315	0.957	0.271	4.072
8H3X	0.848	0.888	0.803	1.129
8HLN	0.843	0.973	0.011	13.692
8I2F	0.896	0.94	0.895	0.681
8I5V	0.929	0.958	0.932	0.593
8IJ9	0.806	0.95	0.414	2.888
8JTK	0.289	0.976	0.041	18.305
8ORN	0.768	0.86	0.646	1.86
8PFC	0.823	0.896	0.797	1.307
8ST7	0.783	0.953	0.602	2.306
8ST8	0.777	0.957	0.453	2.722
