# Supplementary figures and images for: Structural assembly of the bacterial essential interactome
Source: eLife journal article supplement (doi:10.7554/elife.94919), 2024-01-16

AccB-BirA

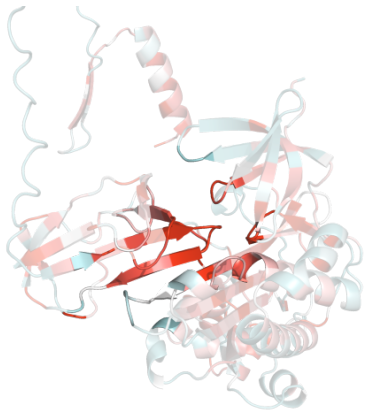

AccABCD

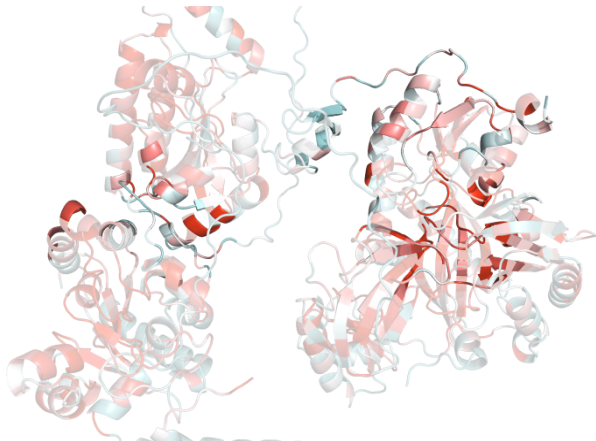

FabG-AcpP

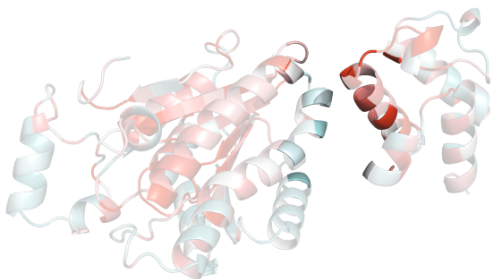

FabI-AcpP

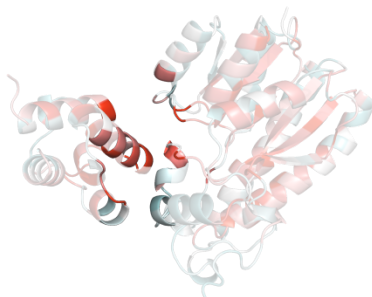

GlmU-AcpP

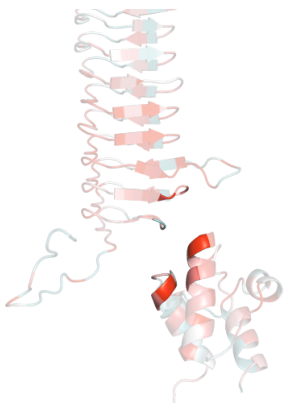

LpxA-AcpP

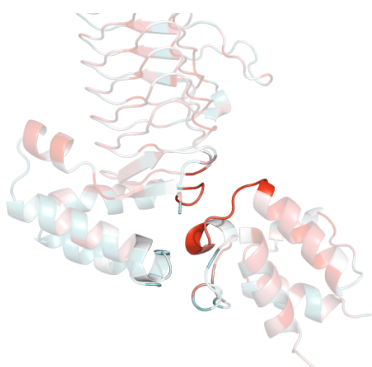

LpxD-AcpP

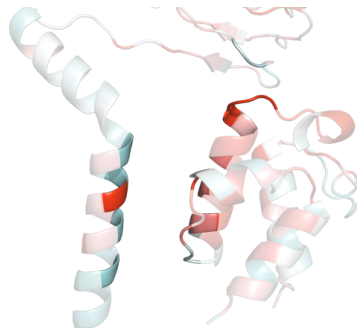

Supplement: supp [file elife_poa_e94919_Figure_1_figure_supplement_3.pdf › elife_poa_e94919_Figure_1_figure_supplement_3.pdf]

LolA-LolB

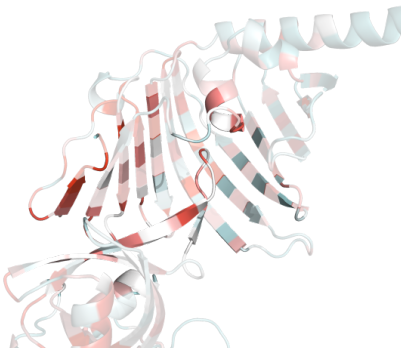

LolA-LolC

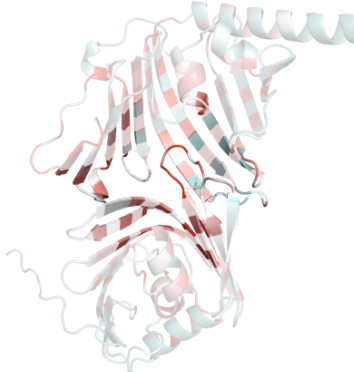

DnaN-PolA

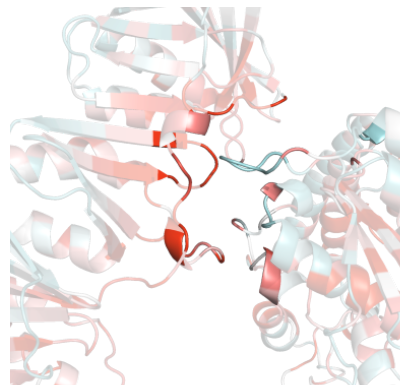

FtsE-FtsX

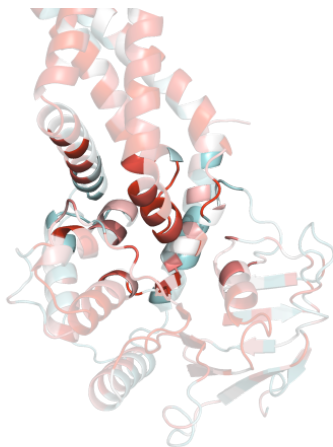

FtsQLBK

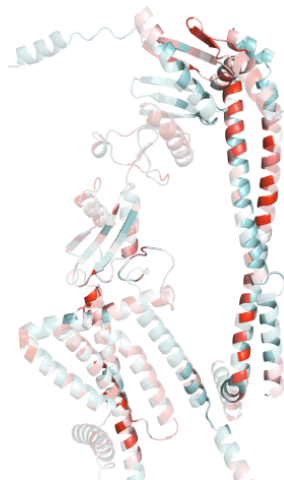

DnaA-DnaA

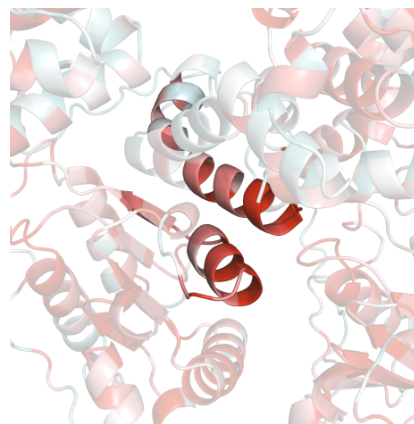

DnaB-DnaC

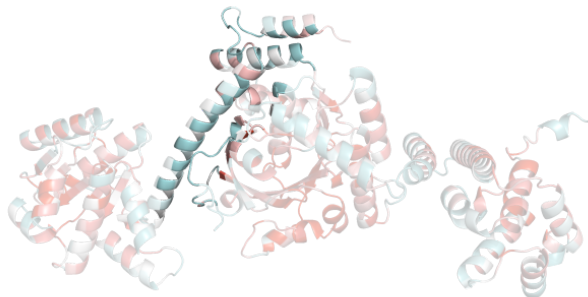

DnaB-DnaI

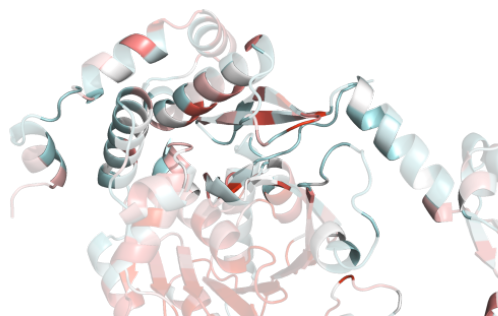

Supplement: supp [file elife_poa_e94919_Figure_1_figure_supplement_4.pdf › elife_poa_e94919_Figure_1_figure_supplement_4.pdf]

FolP-GyrA

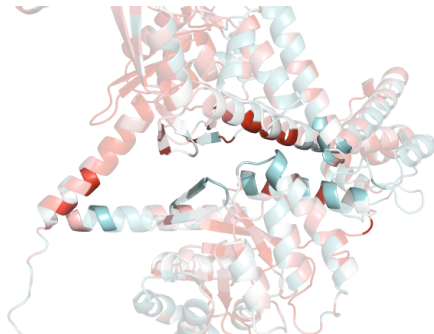

GyrA-GyrB

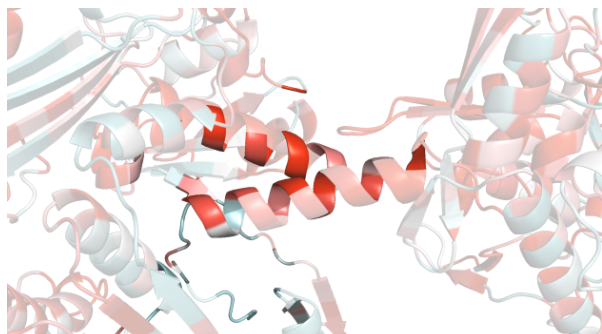

NrdE-NrdF

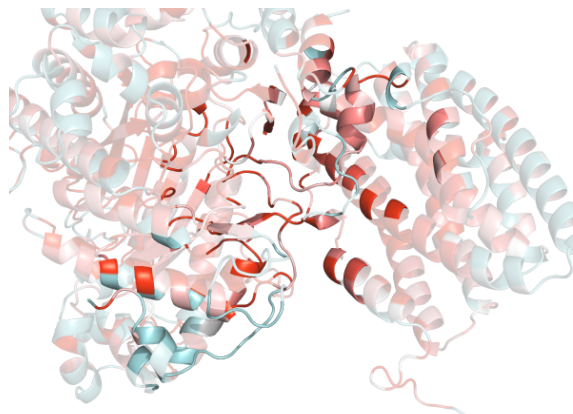

Ubi metabolome

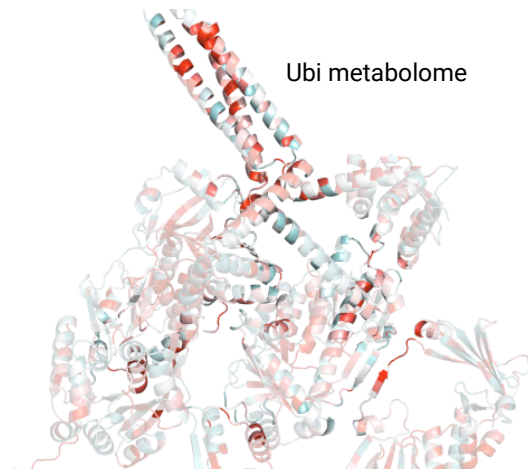

Sec complex

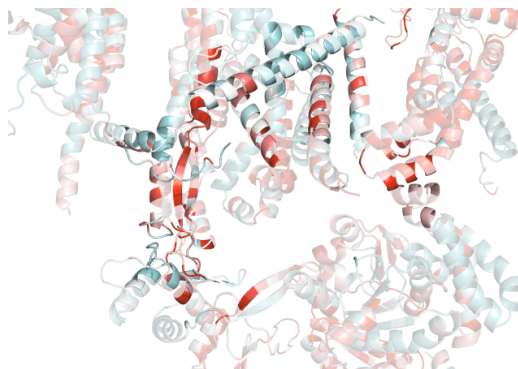

Elongasome

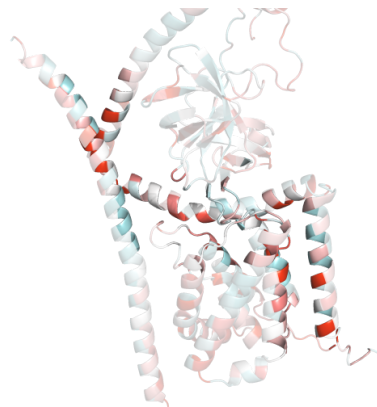

Supplement: supp [file elife_poa_e94919_Figure_1_figure_supplement_5.pdf › elife_poa_e94919_Figure_1_figure_supplement_5.pdf]

**a**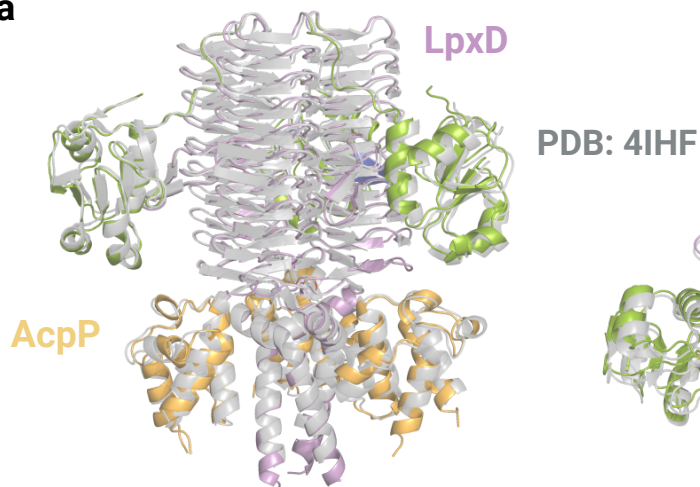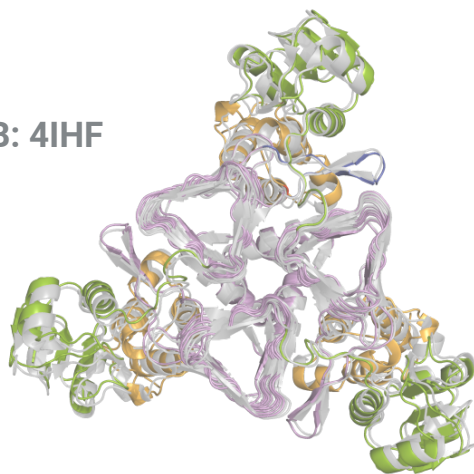**b**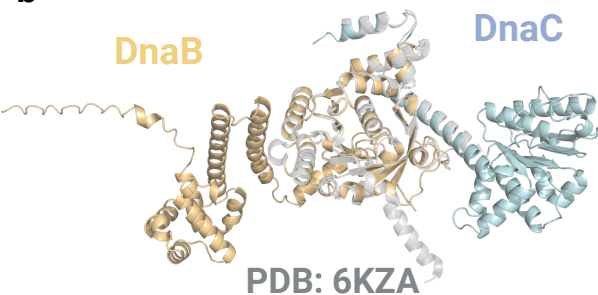**d**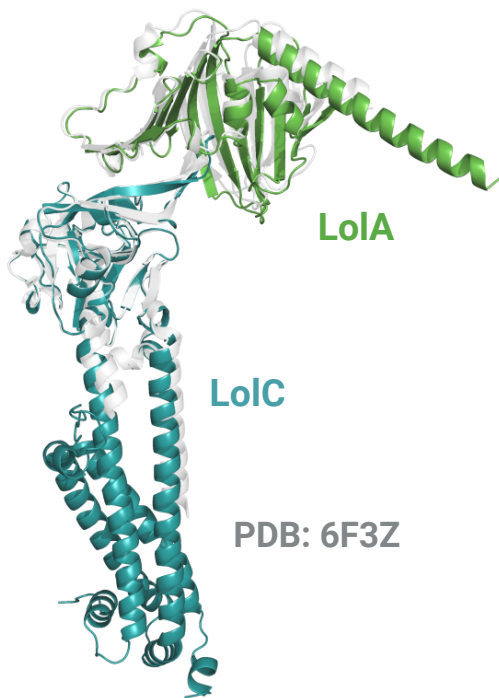**c**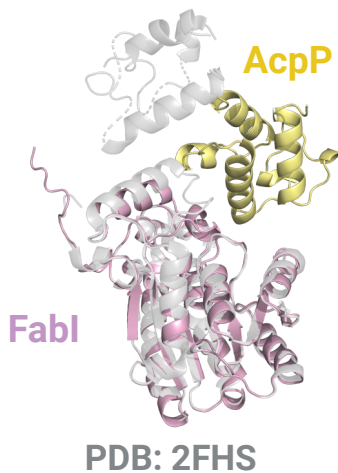

Supplement: supp [file elife_poa_e94919_Figure_2_figure_supplement_1.pdf › elife_poa_e94919_Figure_2_figure_supplement_1.pdf]

**a**

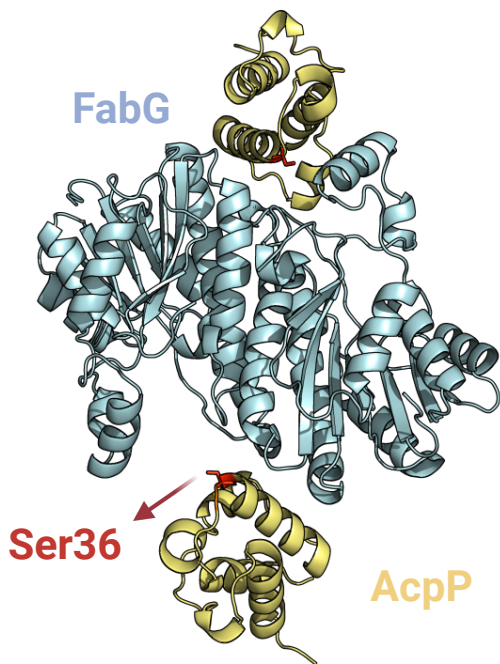

**b**

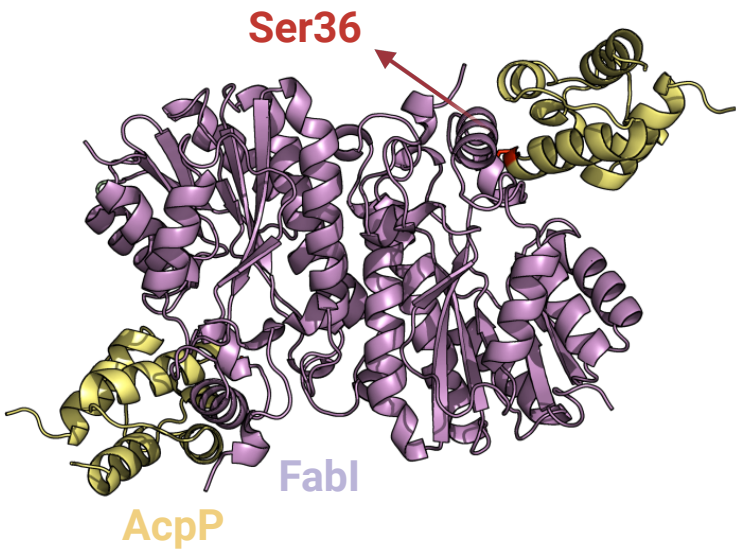

Supplement: supp [file elife_poa_e94919_Figure_3_figure_supplement_1.pdf › elife_poa_e94919_Figure_3_figure_supplement_1.pdf]

**a**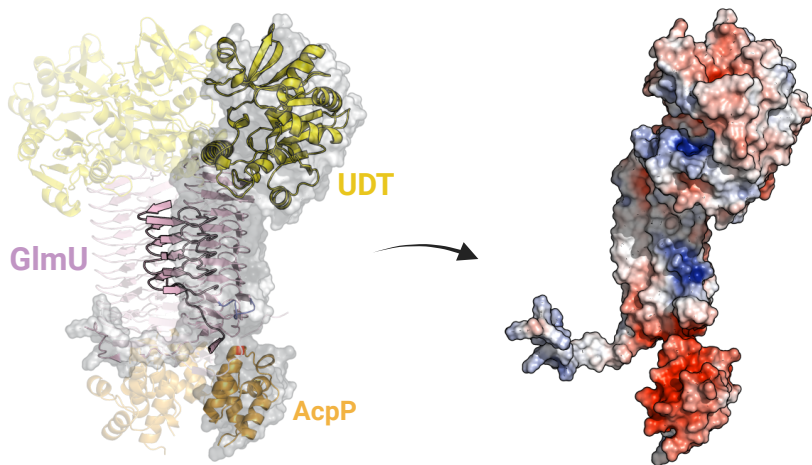**b**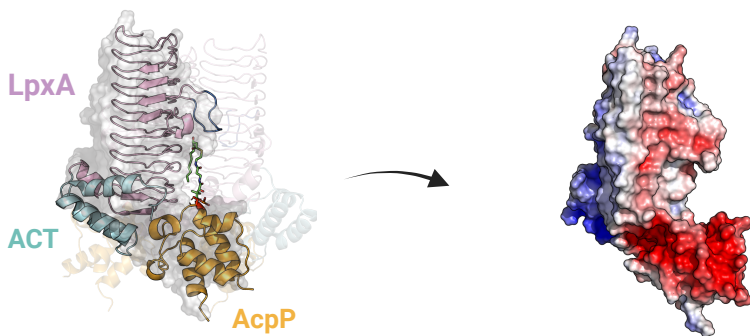**c**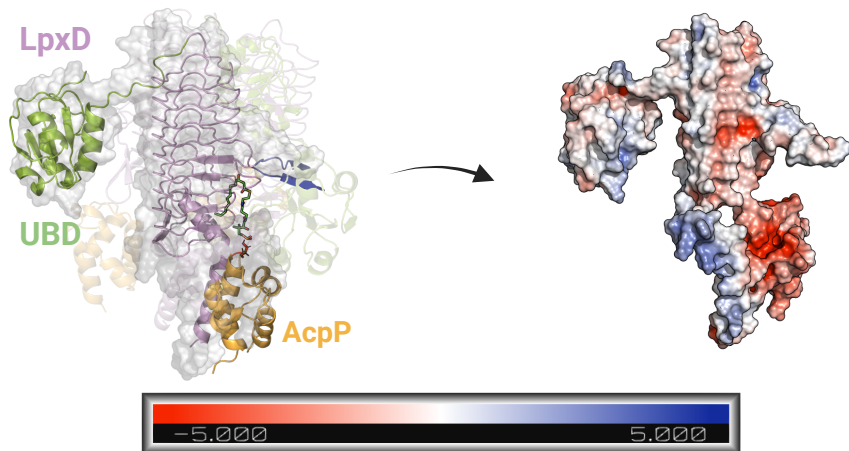

Supplement: supp [file elife_poa_e94919_Figure_4_figure_supplement_1.pdf › elife_poa_e94919_Figure_4_figure_supplement_1.pdf]

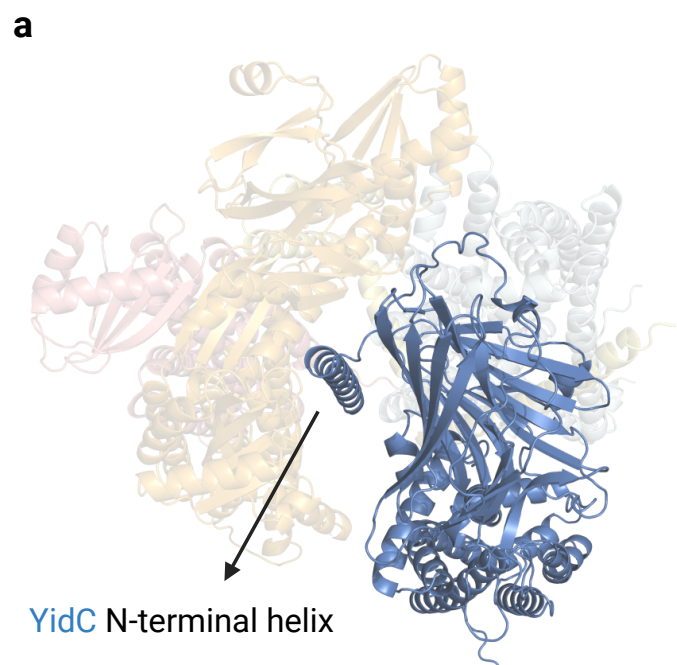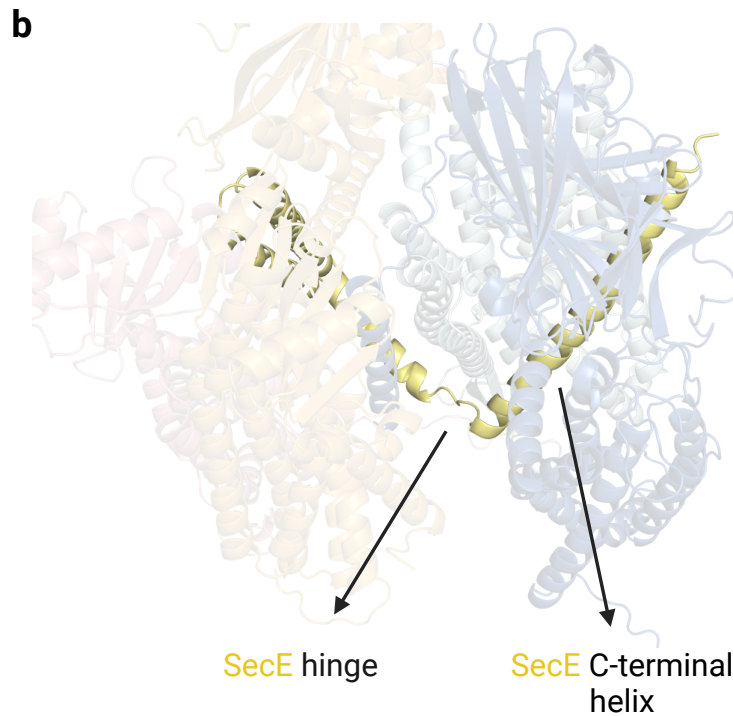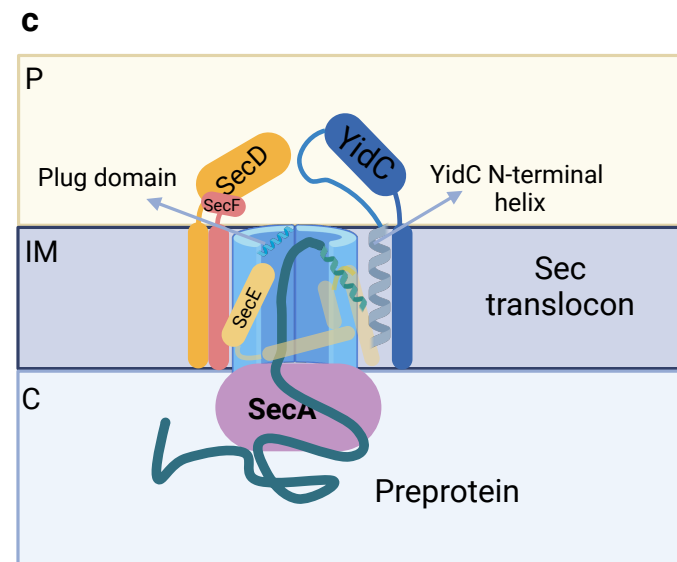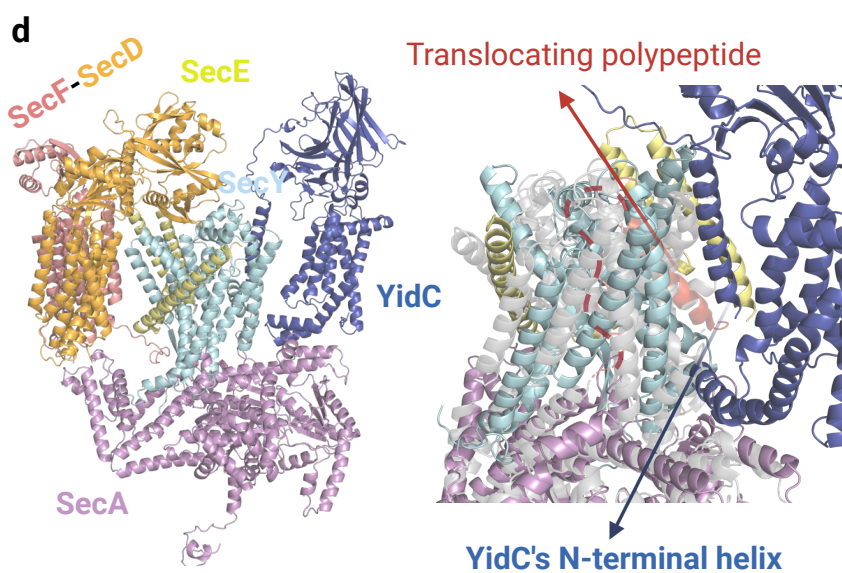

Supplement: supp [file elife_poa_e94919_Figure_6_figure_supplement_1.pdf › elife_poa_e94919_Figure_6_figure_supplement_1.pdf]

**a**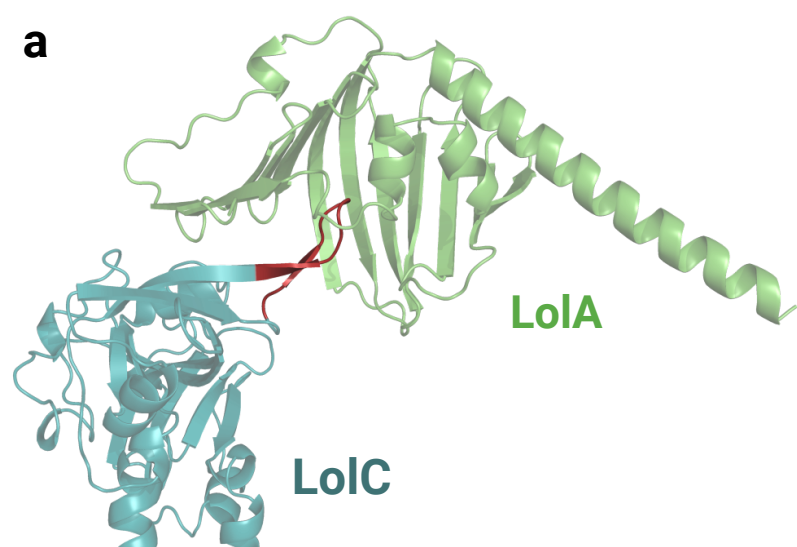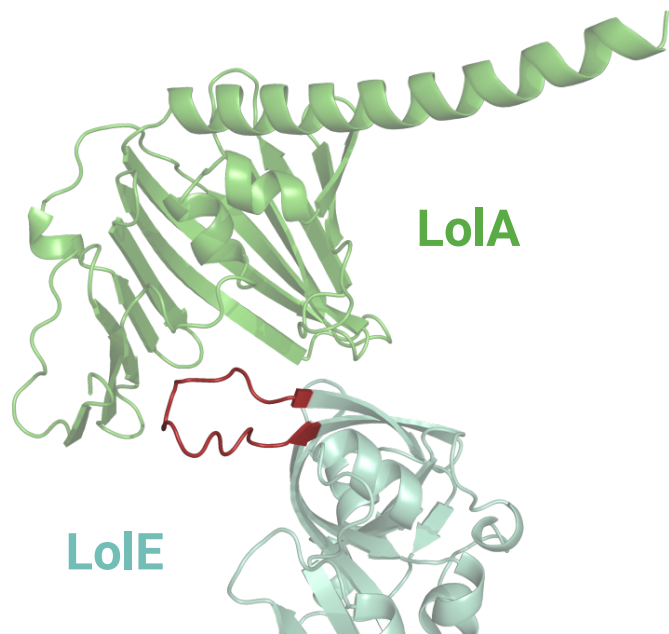**b****LolB**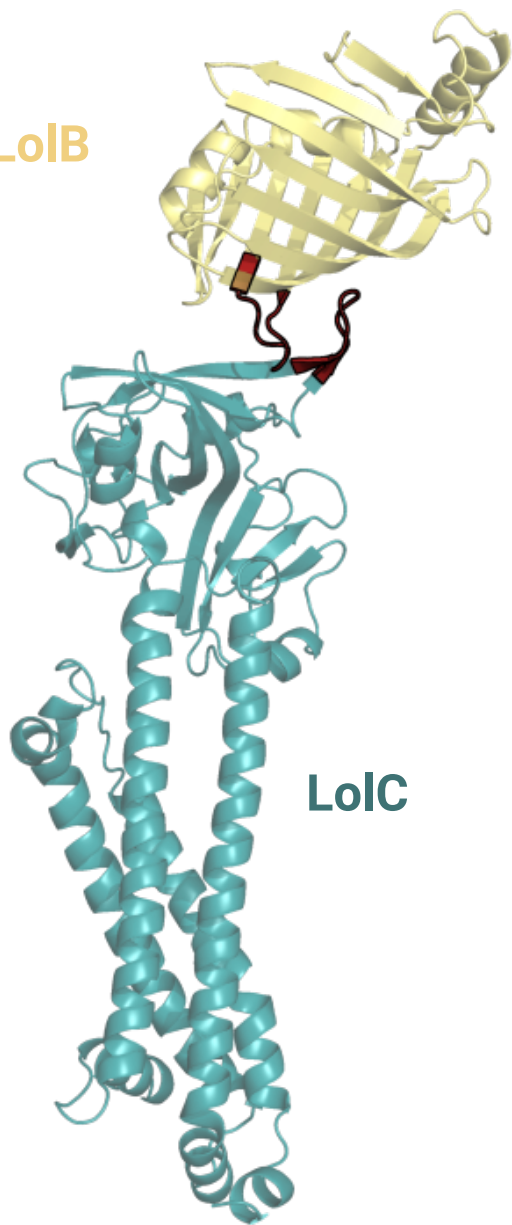

Supplement: supp [file elife_poa_e94919_Figure_7_figure_supplement_1.pdf › elife_poa_e94919_Figure_7_figure_supplement_1.pdf]

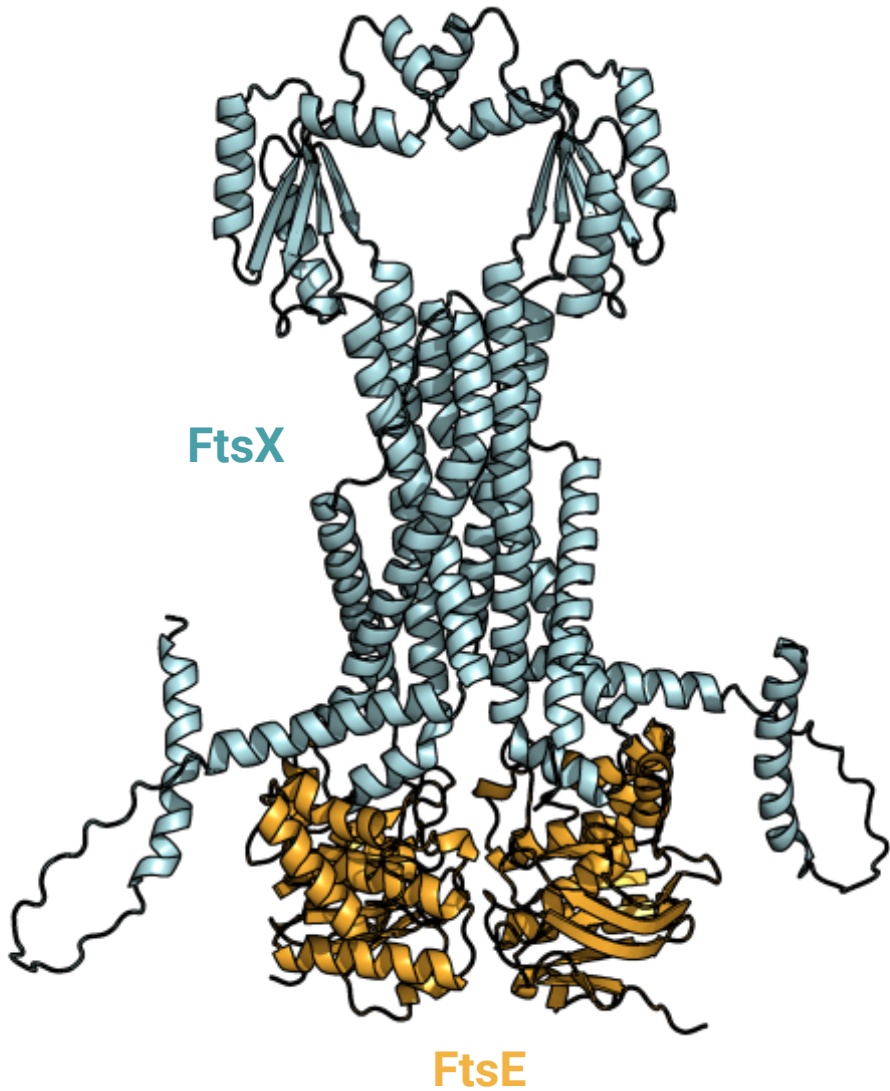

Supplement: supp [file elife_poa_e94919_Figure_8_figure_supplement_1.pdf › elife_poa_e94919_Figure_8_figure_supplement_1.pdf]

Front view

Divisome  
Fts<sup>QLBW</sup>INA

Lateral view

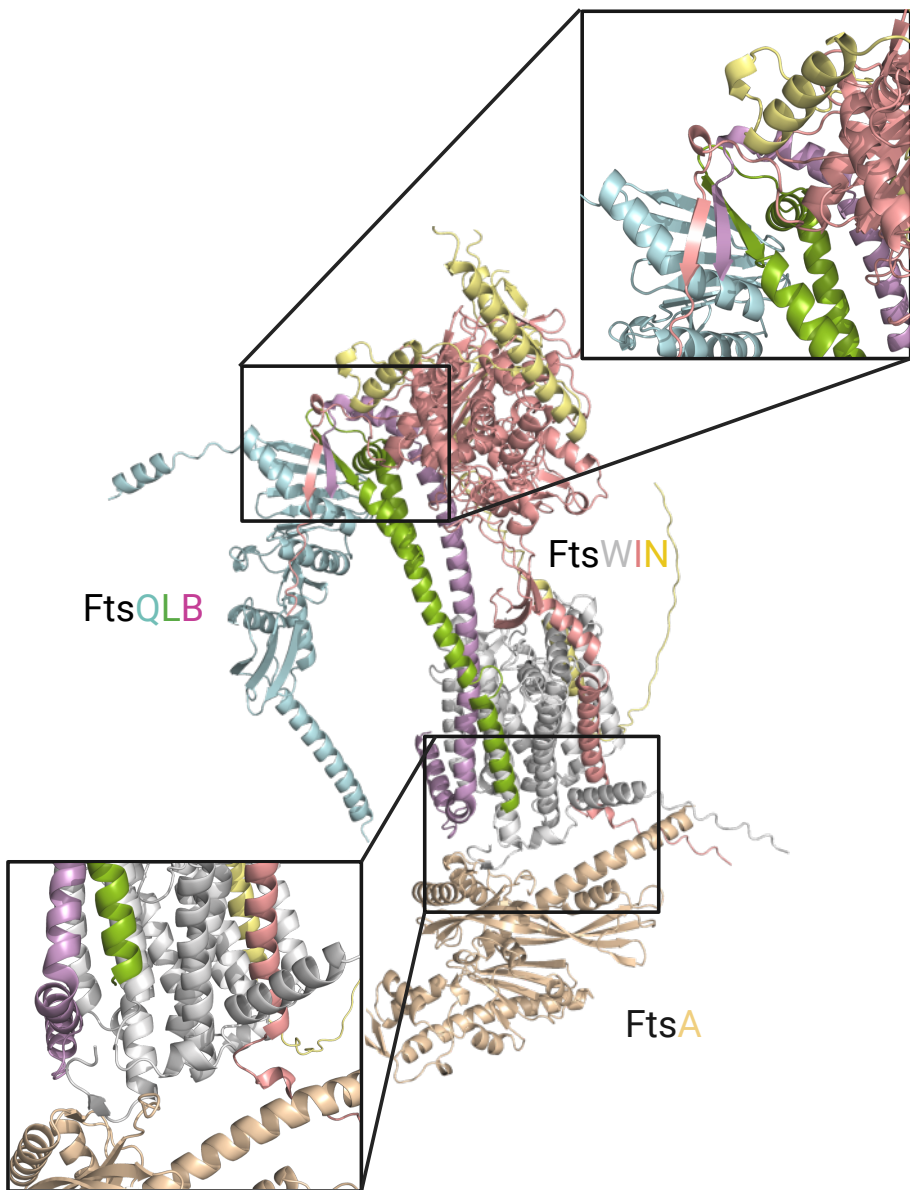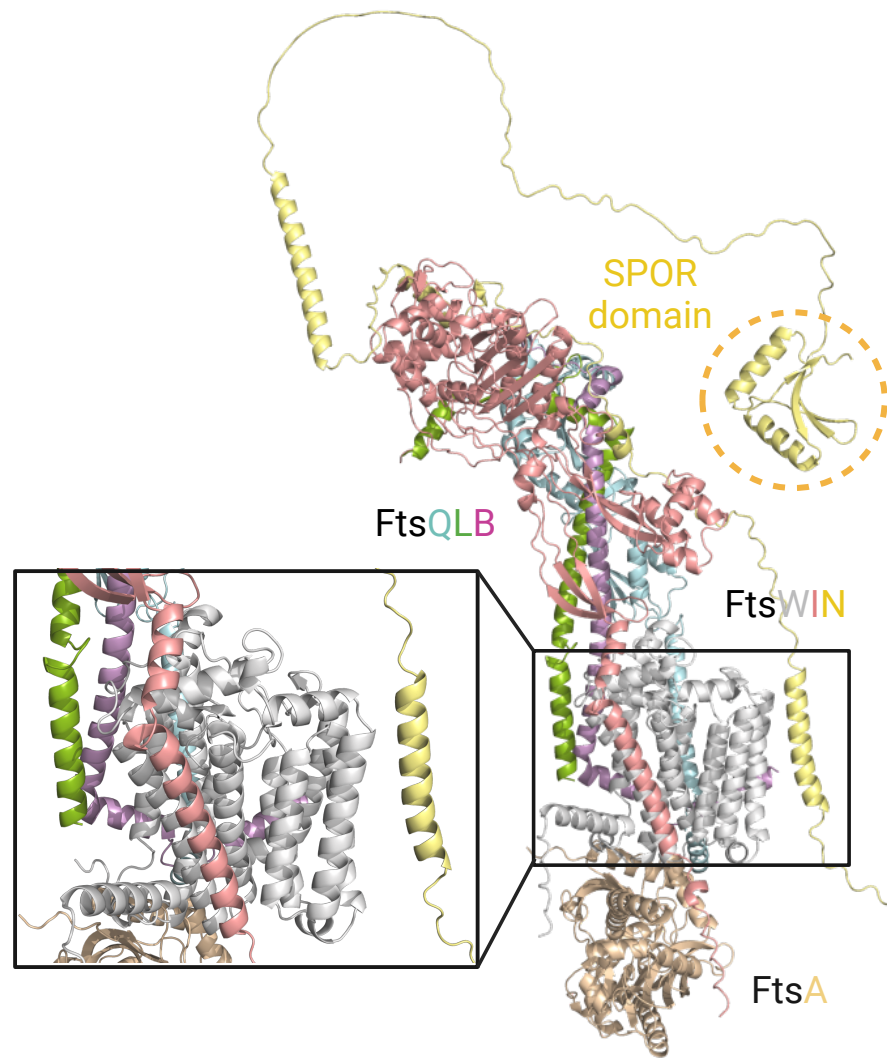

Supplement: supp [file elife_poa_e94919_Figure_8_figure_supplement_2.pdf › elife_poa_e94919_Figure_8_figure_supplement_2.pdf]

Front view

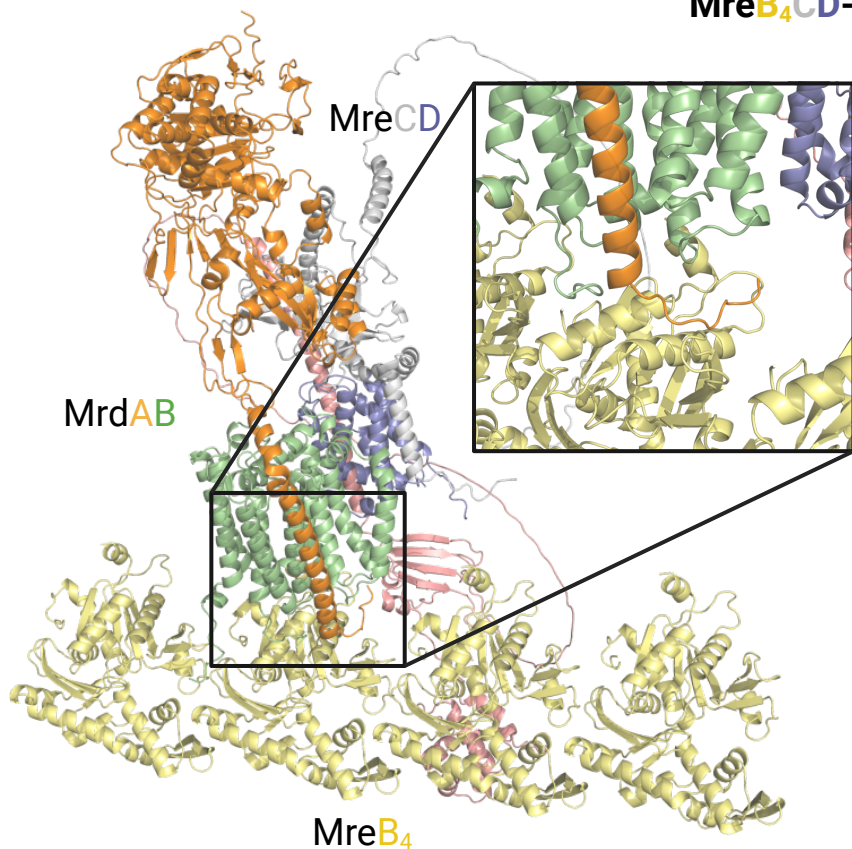

Elongasome  
MreB<sub>4</sub>CD-RodZ-MrdAB

Lateral view

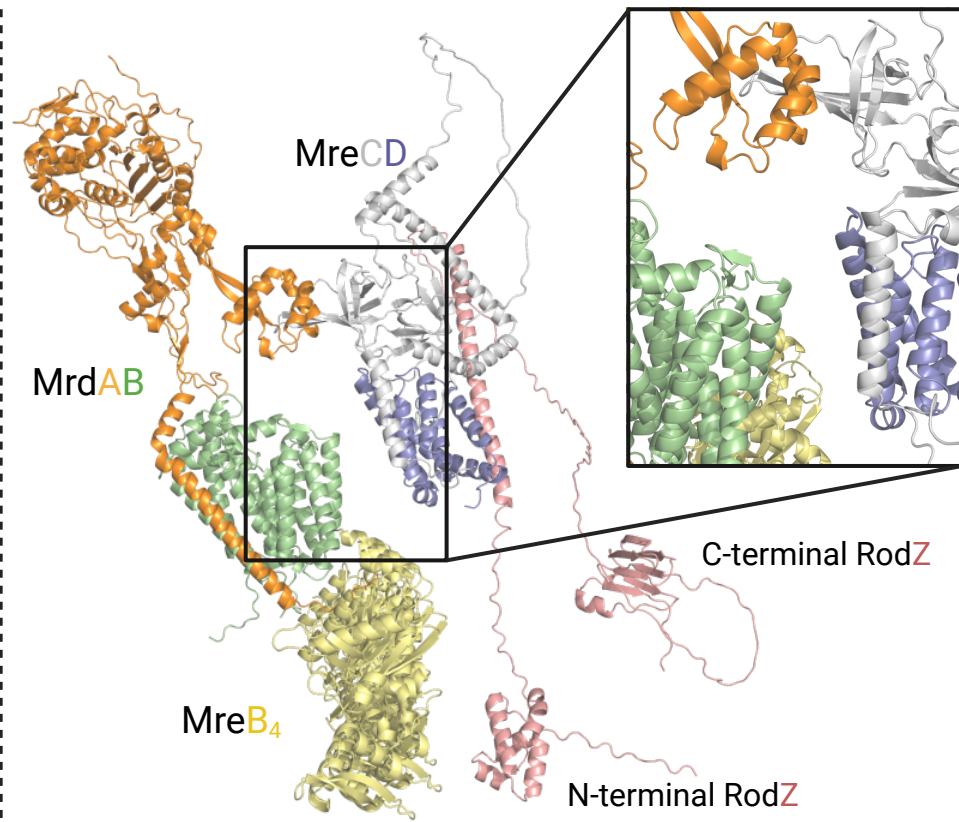

Supplement: supp [file elife_poa_e94919_Figure_8_figure_supplement_3.pdf › elife_poa_e94919_Figure_8_figure_supplement_3.pdf]

Domain I-II

Domain III

Domain IV

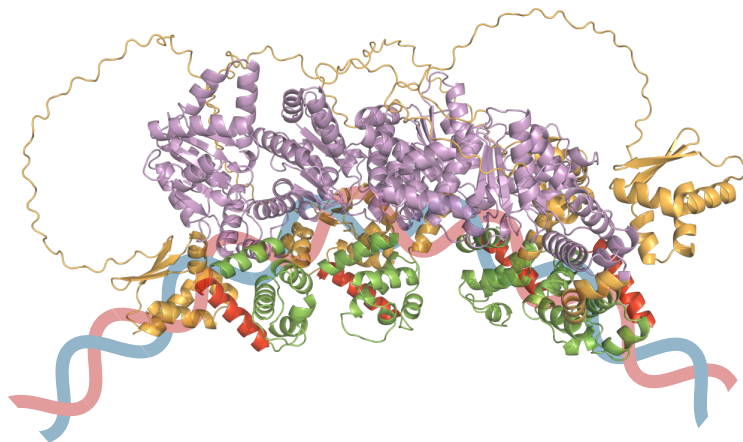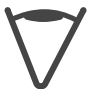

Helix-turn-helix motif

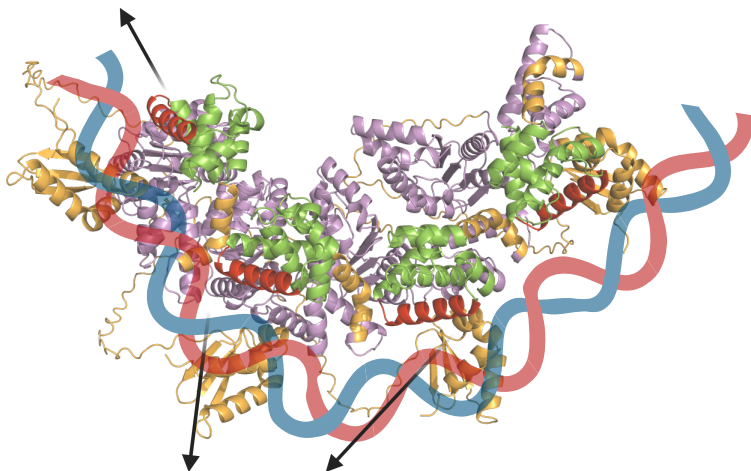

Major groove DnaA box

Supplement: supp [file elife_poa_e94919_Figure_9_figure_supplement_1.pdf › elife_poa_e94919_Figure_9_figure_supplement_1.pdf]
